# Supplementary material for: Real-time DNA barcoding in a rainforest using nanopore sequencing: opportunities for rapid biodiversity assessments and local capacity building
Source: PubMed Central journal article supplement (PMC5905381; doi:10.1093/gigascience/giy033), 2018-04-02

# GigaScience

## Real-time DNA barcoding in a rainforest using nanopore sequencing: opportunities for rapid biodiversity assessments and local capacity building

--Manuscript Draft--

|                                                      |                                                                                                                                                                                                                                                                                                                                                                                                                                                                                                                                                                                                                                                                                                                                                                                                                                                                                                                                                                                                                                                                                                                                                                                                                                                                                                                                                                                                                                                                                                                                                                                                                                                                                                                                                                                                                                                                                                                                                                                                                                                                                                                    |                    |
|------------------------------------------------------|--------------------------------------------------------------------------------------------------------------------------------------------------------------------------------------------------------------------------------------------------------------------------------------------------------------------------------------------------------------------------------------------------------------------------------------------------------------------------------------------------------------------------------------------------------------------------------------------------------------------------------------------------------------------------------------------------------------------------------------------------------------------------------------------------------------------------------------------------------------------------------------------------------------------------------------------------------------------------------------------------------------------------------------------------------------------------------------------------------------------------------------------------------------------------------------------------------------------------------------------------------------------------------------------------------------------------------------------------------------------------------------------------------------------------------------------------------------------------------------------------------------------------------------------------------------------------------------------------------------------------------------------------------------------------------------------------------------------------------------------------------------------------------------------------------------------------------------------------------------------------------------------------------------------------------------------------------------------------------------------------------------------------------------------------------------------------------------------------------------------|--------------------|
| <b>Manuscript Number:</b>                            | GIGA-D-17-00345R1                                                                                                                                                                                                                                                                                                                                                                                                                                                                                                                                                                                                                                                                                                                                                                                                                                                                                                                                                                                                                                                                                                                                                                                                                                                                                                                                                                                                                                                                                                                                                                                                                                                                                                                                                                                                                                                                                                                                                                                                                                                                                                  |                    |
| <b>Full Title:</b>                                   | Real-time DNA barcoding in a rainforest using nanopore sequencing: opportunities for rapid biodiversity assessments and local capacity building                                                                                                                                                                                                                                                                                                                                                                                                                                                                                                                                                                                                                                                                                                                                                                                                                                                                                                                                                                                                                                                                                                                                                                                                                                                                                                                                                                                                                                                                                                                                                                                                                                                                                                                                                                                                                                                                                                                                                                    |                    |
| <b>Article Type:</b>                                 | Research                                                                                                                                                                                                                                                                                                                                                                                                                                                                                                                                                                                                                                                                                                                                                                                                                                                                                                                                                                                                                                                                                                                                                                                                                                                                                                                                                                                                                                                                                                                                                                                                                                                                                                                                                                                                                                                                                                                                                                                                                                                                                                           |                    |
| <b>Funding Information:</b>                          | National Geographic Society (W412-15)                                                                                                                                                                                                                                                                                                                                                                                                                                                                                                                                                                                                                                                                                                                                                                                                                                                                                                                                                                                                                                                                                                                                                                                                                                                                                                                                                                                                                                                                                                                                                                                                                                                                                                                                                                                                                                                                                                                                                                                                                                                                              | Mr Aaron Pomerantz |
| <b>Abstract:</b>                                     | <p><b>Background</b><br/>Advancements in portable scientific instruments provide promising avenues to expedite field work in order to understand the diverse array of organisms that inhabit our planet. Here, we tested the feasibility for in situ molecular analyses of endemic fauna using a portable laboratory fitting within a single backpack, in one of the world's most imperiled biodiversity hotspots: the Ecuadorian Chocó rainforest. We utilized portable equipment, including the MinION nanopore sequencer (Oxford Nanopore Technologies) and the miniPCR (miniPCR), to perform DNA extraction, PCR amplification and real-time DNA barcoding of reptile specimens in the field.</p> <p><b>Findings</b><br/>We demonstrate that nanopore sequencing can be implemented in a remote tropical forest to quickly and accurately identify species using DNA barcoding, as we generated consensus sequences for species resolution with an accuracy of &gt;99% in less than 24 hours after collecting specimens. The flexibility of our mobile laboratory further allowed us to generate sequence information at Universidad Tecnológica Indoamérica in Quito for rare, endangered, and undescribed species. This includes the recently re-discovered Jambato toad, which was thought to be extinct for 28 years. Sequences generated on the MinION required as little as 30 reads to achieve high accuracy relative to Sanger sequencing and with further multiplexing of samples, nanopore sequencing can become a cost-effective approach for rapid and portable DNA barcoding.</p> <p><b>Conclusions</b><br/>Overall, we establish how mobile laboratories and nanopore sequencing can help to accelerate species identification in remote areas to aid in conservation efforts and be applied to research facilities in developing countries. This opens up possibilities for biodiversity research by promoting local research capacity building, teaching laymen and students about the environment, tackling wildlife crime or by promoting conservation via research focused eco-tourism.</p> |                    |
| <b>Corresponding Author:</b>                         | Aaron Pomerantz<br>University of California Berkeley<br>UNITED STATES                                                                                                                                                                                                                                                                                                                                                                                                                                                                                                                                                                                                                                                                                                                                                                                                                                                                                                                                                                                                                                                                                                                                                                                                                                                                                                                                                                                                                                                                                                                                                                                                                                                                                                                                                                                                                                                                                                                                                                                                                                              |                    |
| <b>Corresponding Author Secondary Information:</b>   |                                                                                                                                                                                                                                                                                                                                                                                                                                                                                                                                                                                                                                                                                                                                                                                                                                                                                                                                                                                                                                                                                                                                                                                                                                                                                                                                                                                                                                                                                                                                                                                                                                                                                                                                                                                                                                                                                                                                                                                                                                                                                                                    |                    |
| <b>Corresponding Author's Institution:</b>           | University of California Berkeley                                                                                                                                                                                                                                                                                                                                                                                                                                                                                                                                                                                                                                                                                                                                                                                                                                                                                                                                                                                                                                                                                                                                                                                                                                                                                                                                                                                                                                                                                                                                                                                                                                                                                                                                                                                                                                                                                                                                                                                                                                                                                  |                    |
| <b>Corresponding Author's Secondary Institution:</b> |                                                                                                                                                                                                                                                                                                                                                                                                                                                                                                                                                                                                                                                                                                                                                                                                                                                                                                                                                                                                                                                                                                                                                                                                                                                                                                                                                                                                                                                                                                                                                                                                                                                                                                                                                                                                                                                                                                                                                                                                                                                                                                                    |                    |
| <b>First Author:</b>                                 | Aaron Pomerantz                                                                                                                                                                                                                                                                                                                                                                                                                                                                                                                                                                                                                                                                                                                                                                                                                                                                                                                                                                                                                                                                                                                                                                                                                                                                                                                                                                                                                                                                                                                                                                                                                                                                                                                                                                                                                                                                                                                                                                                                                                                                                                    |                    |
| <b>First Author Secondary Information:</b>           |                                                                                                                                                                                                                                                                                                                                                                                                                                                                                                                                                                                                                                                                                                                                                                                                                                                                                                                                                                                                                                                                                                                                                                                                                                                                                                                                                                                                                                                                                                                                                                                                                                                                                                                                                                                                                                                                                                                                                                                                                                                                                                                    |                    |
| <b>Order of Authors:</b>                             | Aaron Pomerantz<br>Nicolás Peñafiel<br>Alejandro Arteaga                                                                                                                                                                                                                                                                                                                                                                                                                                                                                                                                                                                                                                                                                                                                                                                                                                                                                                                                                                                                                                                                                                                                                                                                                                                                                                                                                                                                                                                                                                                                                                                                                                                                                                                                                                                                                                                                                                                                                                                                                                                           |                    |

|                                                |                                                                                                                                                                                                                                                                                                                                                                                                                                                                                                                                                                                                                                                                                                                                                                                                                                                                                                                                                                                                                                                                                                                                                                                                                                                                                                                                                                                                                                                                                                                                                                                                                                                                                                                                                                                                                                                                                                                                                                                                                                                                                                                                                                                                                                                                                                                                                                                                                                                                                                                                                                                                                                                                                                                                                                                                                                                                                                                                                                                                                                                                                                                                                                                                                                                                                                                                                                                                                                |
|------------------------------------------------|--------------------------------------------------------------------------------------------------------------------------------------------------------------------------------------------------------------------------------------------------------------------------------------------------------------------------------------------------------------------------------------------------------------------------------------------------------------------------------------------------------------------------------------------------------------------------------------------------------------------------------------------------------------------------------------------------------------------------------------------------------------------------------------------------------------------------------------------------------------------------------------------------------------------------------------------------------------------------------------------------------------------------------------------------------------------------------------------------------------------------------------------------------------------------------------------------------------------------------------------------------------------------------------------------------------------------------------------------------------------------------------------------------------------------------------------------------------------------------------------------------------------------------------------------------------------------------------------------------------------------------------------------------------------------------------------------------------------------------------------------------------------------------------------------------------------------------------------------------------------------------------------------------------------------------------------------------------------------------------------------------------------------------------------------------------------------------------------------------------------------------------------------------------------------------------------------------------------------------------------------------------------------------------------------------------------------------------------------------------------------------------------------------------------------------------------------------------------------------------------------------------------------------------------------------------------------------------------------------------------------------------------------------------------------------------------------------------------------------------------------------------------------------------------------------------------------------------------------------------------------------------------------------------------------------------------------------------------------------------------------------------------------------------------------------------------------------------------------------------------------------------------------------------------------------------------------------------------------------------------------------------------------------------------------------------------------------------------------------------------------------------------------------------------------------|
|                                                | Lucas Bustamante                                                                                                                                                                                                                                                                                                                                                                                                                                                                                                                                                                                                                                                                                                                                                                                                                                                                                                                                                                                                                                                                                                                                                                                                                                                                                                                                                                                                                                                                                                                                                                                                                                                                                                                                                                                                                                                                                                                                                                                                                                                                                                                                                                                                                                                                                                                                                                                                                                                                                                                                                                                                                                                                                                                                                                                                                                                                                                                                                                                                                                                                                                                                                                                                                                                                                                                                                                                                               |
|                                                | Frank Pichardo                                                                                                                                                                                                                                                                                                                                                                                                                                                                                                                                                                                                                                                                                                                                                                                                                                                                                                                                                                                                                                                                                                                                                                                                                                                                                                                                                                                                                                                                                                                                                                                                                                                                                                                                                                                                                                                                                                                                                                                                                                                                                                                                                                                                                                                                                                                                                                                                                                                                                                                                                                                                                                                                                                                                                                                                                                                                                                                                                                                                                                                                                                                                                                                                                                                                                                                                                                                                                 |
|                                                | Luis A Coloma                                                                                                                                                                                                                                                                                                                                                                                                                                                                                                                                                                                                                                                                                                                                                                                                                                                                                                                                                                                                                                                                                                                                                                                                                                                                                                                                                                                                                                                                                                                                                                                                                                                                                                                                                                                                                                                                                                                                                                                                                                                                                                                                                                                                                                                                                                                                                                                                                                                                                                                                                                                                                                                                                                                                                                                                                                                                                                                                                                                                                                                                                                                                                                                                                                                                                                                                                                                                                  |
|                                                | César Barrio-Amorós                                                                                                                                                                                                                                                                                                                                                                                                                                                                                                                                                                                                                                                                                                                                                                                                                                                                                                                                                                                                                                                                                                                                                                                                                                                                                                                                                                                                                                                                                                                                                                                                                                                                                                                                                                                                                                                                                                                                                                                                                                                                                                                                                                                                                                                                                                                                                                                                                                                                                                                                                                                                                                                                                                                                                                                                                                                                                                                                                                                                                                                                                                                                                                                                                                                                                                                                                                                                            |
|                                                | David Salazar-Valenzuela                                                                                                                                                                                                                                                                                                                                                                                                                                                                                                                                                                                                                                                                                                                                                                                                                                                                                                                                                                                                                                                                                                                                                                                                                                                                                                                                                                                                                                                                                                                                                                                                                                                                                                                                                                                                                                                                                                                                                                                                                                                                                                                                                                                                                                                                                                                                                                                                                                                                                                                                                                                                                                                                                                                                                                                                                                                                                                                                                                                                                                                                                                                                                                                                                                                                                                                                                                                                       |
|                                                | Stefan Prost                                                                                                                                                                                                                                                                                                                                                                                                                                                                                                                                                                                                                                                                                                                                                                                                                                                                                                                                                                                                                                                                                                                                                                                                                                                                                                                                                                                                                                                                                                                                                                                                                                                                                                                                                                                                                                                                                                                                                                                                                                                                                                                                                                                                                                                                                                                                                                                                                                                                                                                                                                                                                                                                                                                                                                                                                                                                                                                                                                                                                                                                                                                                                                                                                                                                                                                                                                                                                   |
| <b>Order of Authors Secondary Information:</b> |                                                                                                                                                                                                                                                                                                                                                                                                                                                                                                                                                                                                                                                                                                                                                                                                                                                                                                                                                                                                                                                                                                                                                                                                                                                                                                                                                                                                                                                                                                                                                                                                                                                                                                                                                                                                                                                                                                                                                                                                                                                                                                                                                                                                                                                                                                                                                                                                                                                                                                                                                                                                                                                                                                                                                                                                                                                                                                                                                                                                                                                                                                                                                                                                                                                                                                                                                                                                                                |
| <b>Response to Reviewers:</b>                  | <p>Reviewer reports:</p> <p>Reviewer #1: The authors show us the possibility of real time DNA barcoding by utilizing a few portable laboratory fittings, especially the MinION sequencing platform, which is one of several sequencers that is small enough to be portable for field work. As the authors may aware that several studies have already published in respect to such interests, e. g. Michele et al, Plos One, 2017, on site DNA barcoding by nanopore sequencing.</p> <p>In addition, the authors may want to conduct some extra analyses and show more details of their results to reach several of their main conclusions. For example:</p> <p>1. It asked a lot of work to figure out how many samples on earth have been proceeded in current study, which of them have been processed in field? Have all of them conducted PCR aiming at 3 targeted amplicons? All the information can be easily and succinctly demonstrated in one table.</p> <p>Thank you for the suggestion, we have added a supplementary table that includes all samples from the two runs. This should make it much easier for readers to see what sequencing was performed.</p> <p>2. By subsampling analysis, the authors tried to say a minimum 30 reads are enough to produce reliable barcode sequences, however, the cytb has got &gt; 30 reads while failed to achieve the final consensus sequence. The other markers can also conduct subsampling of 30 reads at least. In addition, the high throughput sequencing platforms are more sensitive and can generate reads for PCR amplicons albeit no clear band via gel electrophoresis. So, the authors should offer more evidences to say that "none of the reads actually belongs to CytB".</p> <p>We blasted all reads and added the results to the manuscript. The analysis showed that we only retrieved 0 to ~3 reads for cytB for all samples. We think that the PCR settings, while working well for 16S, did not perform as well for cytB, and have discussed this in the text.</p> <p>3. The sequencing and Bioinformatics section in supplementary information contains quite a lot valuable information that can help readers better understand current study, the authors may want to move some of the key info to main text. The authors may want to provide details in the form of a table regarding to, for example, how many reads obtained for each marker of each species, the number left after quality filtering, their corresponding length distribution, et al.</p> <p>We moved the supplementary sections into the main manuscript, and shortened some sections to reduce the length and make it easier to read. We also added % of endogenous DNA barcode reads and % of adapters to the Supplementary table.</p> <p>4. The authors tried to attribute the higher error rate of ND4 to contamination. Nanopore reads have extremely high error rate, especially for 1D reads, so it won't be a surprise for me if the reads got a top hit to another taxonomic group on NCBI. So, it is better to blast the ND4 reads of another species, e.g. Gecko 2 in your study, to NCBI to see what you can get before reaching the conclusion of contamination. BTW, I suppose you constructed 1D library rather than 2D, please provide such info in your text.</p> <p>We blasted ND4 for all species against NCBI, we moved that information from the</p> |

Supplementary to the main manuscript. As can be seen in the new Supplementary table, the Gecko 1 ND4 reads have a much lower % of endogenous ND4 reads when compared to the viper sample (10% compared to 70%).

5. ANGSD -dofasta algorithm would not introduce indel to references, which can be one of the reasons why some of your reference-based consensus sequences contained more errors. The authors may want to compare the references, angsd-based consensus and their corresponding sanger sequences to see whether the discrepancies between each other will engender such bias.

In many cases we found the differences to be insertions of >2 bp compared to the Sanger sequence. In general, mapping approaches show a reference bias, especially for longer indels, but we did not find any of those in our sequenced samples.

6. Fig. 2: the 2 options share the same "read mapping to consensus" that can be merged. Plus, it would be better to provide more details of the denovo method, for example, did you choose the assemblies containing the highest number of reads as candidate consensus? If so, one of the subsampling set 4 (1000 reads, table S3) of gecko 1 got its assembly with only 1 read, what's your criteria for the following selection? And the authors also mentioned that "While the CytB de novo assembly did not succeed (no two reads assembled together)". Did the authors adopt exact same criteria all through?

We changed Supplementary Figure 2. We also added the requested info to the methods.

7. The second sequencing run at UTI generated quite a few adapter dimmers, how about that in the first run? Have you checked that? The information provided in Fig. S1 is quite bewildering, what does the length represent for, 710 bp and 54 bp? Also, what does the red rectangle represent for? Plus, what's the length of adapters, can they be filtered out in the very first step.

We removed Supplementary Figure 1, and added the info to the new Supplementary table. We used filtering using size to establish the % of adapters. So, yes it could be used for filtering, but since the adapter sequences are removed in the processing anyway, it should not matter whether they are removed or not.

8. When the authors talked about cost, not all your amplicons have been successfully sequenced, so \$45 per barcode is far from correct estimation. and higher demultiplexing (>300) means less reads generated for each index, which will inevitably lead to higher error rate. The authors may want to tone down this part. In addition, several studies have tried to get individual barcoding at low cost using Miseq and Hiseq platform, you may want to add them in your citation, for example, Shokralla S, Porter TM, Gibson JF et al. Massively parallel multiplex DNA sequencing for specimen identification using an Illumina MiSeq platform. *Sci Rep* 2015;5.

Meier R, Wong W, Srivathsan A et al. \$1 DNA barcodes for reconstructing complex phenomes and finding rare species in specimen-rich samples. *Cladistics* 2016;32(1):100-10.

Liu, S., Yang, C., Zhou, C., & Zhou. Filling reference gaps via assembling DNA barcodes using high-throughput sequencing - moving toward barcoding the world. *GigaScience*, 2017; 1-8.

We have incorporated this additional information to the manuscript. Since we only sequenced a small subset of the total bases of what the MinION can produce there is no issue with low coverage for multiplexing > 300bp. New flow cells reliably produce > 10Gb of output, so comparable output to the MiSeq. We added information on Illumina barcoding to the text.

Lines 195 - 196: it would be better to provide the length of targeted amplicons here.

Line 227: What's CS control?

Line 292: Fig. S4 ?

Line 473: please provide ratio at the same time

|                                                                                                                                                                                                                                                                                                                                                                                                                                    |                                                                                                                                                                                                                                                                                                                                                                                                                                                                                                                                                                                                                                                                                                                                                                                                                                                                                                                                                                                                                                                                                                                                                                                                                                                                                                                                                                                                                                                                                                                                                                                                                                                                                                                                                                                                                                                                                                                                                                                                                                                                                                                                                                                                                                                                                                                                                                                                                                                                       |
|------------------------------------------------------------------------------------------------------------------------------------------------------------------------------------------------------------------------------------------------------------------------------------------------------------------------------------------------------------------------------------------------------------------------------------|-----------------------------------------------------------------------------------------------------------------------------------------------------------------------------------------------------------------------------------------------------------------------------------------------------------------------------------------------------------------------------------------------------------------------------------------------------------------------------------------------------------------------------------------------------------------------------------------------------------------------------------------------------------------------------------------------------------------------------------------------------------------------------------------------------------------------------------------------------------------------------------------------------------------------------------------------------------------------------------------------------------------------------------------------------------------------------------------------------------------------------------------------------------------------------------------------------------------------------------------------------------------------------------------------------------------------------------------------------------------------------------------------------------------------------------------------------------------------------------------------------------------------------------------------------------------------------------------------------------------------------------------------------------------------------------------------------------------------------------------------------------------------------------------------------------------------------------------------------------------------------------------------------------------------------------------------------------------------------------------------------------------------------------------------------------------------------------------------------------------------------------------------------------------------------------------------------------------------------------------------------------------------------------------------------------------------------------------------------------------------------------------------------------------------------------------------------------------------|
|                                                                                                                                                                                                                                                                                                                                                                                                                                    | <p>Additional suggestions/questions addressed in text.</p> <p>Reviewer #2: Pomerantz et al describe the use of portable nanopore sequencing to assess biodiversity and identify animal species. The paper describes a consequential advance in that portable biodiversity assessment offers a powerful tool for conservation, research and education. I consider the approach of the authors rigorous and the presentation of data and advance made clear.</p> <p>My major concern is that the paper spends approximately 250 out of the 600 lines in the main body of the manuscript discussing the broader implications of the work described, rather than the work itself. Evidently, this is an important element of a discussion section, but the narrative developed from ca. line 350 towers over the actual work performed. Many areas of this narrative are speculative: an important role of the discussion is to evaluate the work performed itself, placing it into context, rather than flagging all the possible areas of potential use, or cost implications (which will likely change rapidly) I would strongly recommend that the results and discussion are separated, and that the discussion is condensed significantly, to strengthen its focus on the results, their limitations and interpretations - before a briefer subsection of the discussion deals with the broader interest areas. This is likely to necessitate a substantial rewrite of the results/discussion section.</p> <p>We have moved the results from the Supplementary to the main text, thank you for the suggestion. We have also condensed parts of the text, including in the introduction and discussion.</p> <p>Figure 1 is of contextual interest only and is not required to understand the advance presented. It should be removed or merged with Figure 2, which is generally illustrative of the research process.</p> <p>Genbank data is listed as pending - thanks for making it available for review.</p> <p>Minor comments.<br/> L116: Minor point: Not necessarily a standard laptop computer. The specification of laptop according to Oxford Nanopore Technologies is very high, constraining accessibility.<br/> L121: Snowdonia National Park, Wales<br/> L123-126: this can be updated to include bacterial ID on the ISS.<br/> L278: Should this read Results &amp; Discussion?</p> <p>Additional suggestions have been incorporated in the text.</p> |
| <b>Additional Information:</b>                                                                                                                                                                                                                                                                                                                                                                                                     |                                                                                                                                                                                                                                                                                                                                                                                                                                                                                                                                                                                                                                                                                                                                                                                                                                                                                                                                                                                                                                                                                                                                                                                                                                                                                                                                                                                                                                                                                                                                                                                                                                                                                                                                                                                                                                                                                                                                                                                                                                                                                                                                                                                                                                                                                                                                                                                                                                                                       |
| <b>Question</b>                                                                                                                                                                                                                                                                                                                                                                                                                    | <b>Response</b>                                                                                                                                                                                                                                                                                                                                                                                                                                                                                                                                                                                                                                                                                                                                                                                                                                                                                                                                                                                                                                                                                                                                                                                                                                                                                                                                                                                                                                                                                                                                                                                                                                                                                                                                                                                                                                                                                                                                                                                                                                                                                                                                                                                                                                                                                                                                                                                                                                                       |
| Are you submitting this manuscript to a special series or article collection?                                                                                                                                                                                                                                                                                                                                                      | No                                                                                                                                                                                                                                                                                                                                                                                                                                                                                                                                                                                                                                                                                                                                                                                                                                                                                                                                                                                                                                                                                                                                                                                                                                                                                                                                                                                                                                                                                                                                                                                                                                                                                                                                                                                                                                                                                                                                                                                                                                                                                                                                                                                                                                                                                                                                                                                                                                                                    |
| <p><b>Experimental design and statistics</b></p> <p>Full details of the experimental design and statistical methods used should be given in the Methods section, as detailed in our <a href="#">Minimum Standards Reporting Checklist</a>. Information essential to interpreting the data presented should be made available in the figure legends.</p> <p>Have you included all the information requested in your manuscript?</p> | Yes                                                                                                                                                                                                                                                                                                                                                                                                                                                                                                                                                                                                                                                                                                                                                                                                                                                                                                                                                                                                                                                                                                                                                                                                                                                                                                                                                                                                                                                                                                                                                                                                                                                                                                                                                                                                                                                                                                                                                                                                                                                                                                                                                                                                                                                                                                                                                                                                                                                                   |

|                                                                                                                                                                                                                                                                                                                                                                                                                                                                                                                                                         |     |
|---------------------------------------------------------------------------------------------------------------------------------------------------------------------------------------------------------------------------------------------------------------------------------------------------------------------------------------------------------------------------------------------------------------------------------------------------------------------------------------------------------------------------------------------------------|-----|
| <p><b>Resources</b></p> <p>A description of all resources used, including antibodies, cell lines, animals and software tools, with enough information to allow them to be uniquely identified, should be included in the Methods section. Authors are strongly encouraged to cite <a href="#">Research Resource Identifiers</a> (RRIDs) for antibodies, model organisms and tools, where possible.</p> <p>Have you included the information requested as detailed in our <a href="#">Minimum Standards Reporting Checklist</a>?</p>                     | Yes |
| <p><b>Availability of data and materials</b></p> <p>All datasets and code on which the conclusions of the paper rely must be either included in your submission or deposited in <a href="#">publicly available repositories</a> (where available and ethically appropriate), referencing such data using a unique identifier in the references and in the “Availability of Data and Materials” section of your manuscript.</p> <p>Have you have met the above requirement as detailed in our <a href="#">Minimum Standards Reporting Checklist</a>?</p> | Yes |

1  
2  
3  
4  
5  
6  
7  
8  
9  
10  
11  
12  
13  
14  
15  
16  
17  
18  
19  
20  
21  
22  
23  
24  
25  
26  
27  
28  
29  
30  
31  
32  
33  
34  
35  
36  
37  
38  
39  
40  
41  
42  
43  
44  
45  
46  
47  
48  
49  
50  
51  
52  
53  
54  
55  
56  
57  
58  
59  
60  
61  
62  
63  
64  
65

1 **Real-time DNA barcoding in a rainforest using nanopore sequencing:**  
2 **opportunities for rapid biodiversity assessments and local capacity building**

3  
4 **Aaron Pomerantz<sup>1,\*</sup>, Nicolás Peñafiel<sup>2</sup>, Alejandro Arteaga<sup>3-5</sup>, Lucas Bustamante<sup>5</sup>,**  
5 **Frank Pichardo<sup>5</sup>, Luis A. Coloma<sup>6</sup>, César L. Barrio-Amorós<sup>7</sup>, David Salazar-**  
6 **Valenzuela<sup>2</sup>, Stefan Prost<sup>1,8,\*</sup>**

7  
8 <sup>1</sup> Department of Integrative Biology, University of California, Berkeley, CA, USA

9 <sup>2</sup> Centro de Investigación de la Biodiversidad y Cambio Climático (BioCamb) e  
10 Ingeniería en Biodiversidad y Recursos Genéticos, Facultad de Ciencias de Medio  
11 Ambiente, Universidad Tecnológica Indoamérica, Machala y Sabanilla, Quito, Ecuador

12 <sup>3</sup> *Richard Gilder Graduate School, American Museum of Natural History, New York,*  
13 *USA*

14 <sup>4</sup> *Department of Herpetology, American Museum of Natural History, New York, USA*

15 <sup>5</sup> Tropical Herping, Quito, Ecuador

16 <sup>6</sup> Centro Jambatu de Investigación y Conservación de Anfibios, Fundación Otonga,  
17 Quito, Ecuador

18 <sup>7</sup> Doc Frog Expeditions, Uvita, Costa Rica

19 <sup>8</sup> Program for Conservation Genomics, Department of Biology, Stanford University,  
20 Stanford, CA, USA

21 \* Corresponding authors: [Pomerantz\\_aaron@berkeley.edu](mailto:Pomerantz_aaron@berkeley.edu) (A. Pomerantz) and  
22 [stprost@stanford.edu](mailto:stprost@stanford.edu) (S. Prost)

1  
2  
3  
4 24 Aaron Pomerantz: [pomerantz\\_aaron@berkeley.edu](mailto:pomerantz_aaron@berkeley.edu); Nicolás Peñafiel:  
5  
6 25 [nicolaspennafielloaiza@gmail.com](mailto:nicolaspennafielloaiza@gmail.com); Alejandro Arteaga: [aarteaga@amnh.org](mailto:aarteaga@amnh.org); Lucas  
7  
8  
9 26 Bustamante: [lucmat21@gmail.com](mailto:lucmat21@gmail.com); Frank Pichardo: [frankpichardo@gmail.com](mailto:frankpichardo@gmail.com); Luis A.  
10  
11 27 Coloma: [coloma.l@gmail.com](mailto:coloma.l@gmail.com); César L. Barrio-Amorós: [cesarlba@yahoo.com](mailto:cesarlba@yahoo.com); David  
12  
13  
14 28 Salazar-Valenzuela: [davidsalazarv@gmail.com](mailto:davidsalazarv@gmail.com); Stefan Prost:  
15  
16 29 [stefan.prost@berkeley.edu](mailto:stefan.prost@berkeley.edu)  
17  
18

## 19 30 **Abstract**

## 21 31

## 23 32 **Background**

24 33 Advancements in portable scientific instruments provide promising avenues to expedite  
25  
26 34 field work in order to understand the diverse array of organisms that inhabit our  
27  
28  
29 35 planet. Here, we tested the feasibility for *in situ* molecular analyses of endemic fauna  
30  
31 36 using a portable laboratory fitting within a single backpack, in one of the world's most  
32  
33 37 imperiled biodiversity hotspots: the Ecuadorian Chocó rainforest. We utilized portable  
34  
35  
36 38 equipment, including the MinION nanopore sequencer (Oxford Nanopore Technologies)  
37  
38 39 and the miniPCR (miniPCR), to perform DNA extraction, PCR amplification and real-  
39  
40 40 time DNA barcoding of reptile specimens in the field.  
41  
42  
43  
44  
45  
46  
47

## 48 42 **Findings**

49  
50 43 We demonstrate that nanopore sequencing can be implemented in a remote tropical  
51  
52 44 forest to quickly and accurately identify species using DNA barcoding, as we generated  
53  
54 45 consensus sequences for species resolution with an accuracy of >99% in less than 24  
55  
56  
57 46 hours after collecting specimens. The flexibility of our mobile laboratory further allowed  
58  
59  
60  
61  
62  
63  
64  
65

1  
2  
3  
4  
5  
6  
7  
8  
9  
10  
11  
12  
13  
14  
15  
16  
17  
18  
19  
20  
21  
22  
23  
24  
25  
26  
27  
28  
29  
30  
31  
32  
33  
34  
35  
36  
37  
38  
39  
40  
41  
42  
43  
44  
45  
46  
47  
48  
49  
50  
51  
52  
53  
54  
55  
56  
57  
58  
59  
60  
61  
62  
63  
64  
65

us to generate sequence information at Universidad Tecnológica Indoamérica in Quito for rare, endangered, and undescribed species. This includes the recently re-discovered Jambato toad, which was thought to be extinct for 28 years. Sequences generated on the MinION required as little as 30 reads to achieve high accuracy relative to Sanger sequencing and with further multiplexing of samples, nanopore sequencing can become a cost-effective approach for rapid and portable DNA barcoding.

**Conclusions**

Overall, we establish how mobile laboratories and nanopore sequencing can help to accelerate species identification in remote areas to aid in conservation efforts and be applied to research facilities in developing countries. This opens up possibilities for biodiversity research by promoting local research capacity building, teaching laymen and students about the environment, tackling wildlife crime or by promoting conservation via research focused eco-tourism.

**Keywords**

Nanopore sequencing, portable, DNA barcoding, biodiversity, field-based, real-time

**Data Description**

**Background**

Biodiversity is defined as the variety of life found on Earth, including variation in genes, species, and ecosystems. While about 1.9 million species have been described to date,



1  
2  
3  
4 70 there are an estimated 5-30 million species in total on the planet, with most of the  
5  
6  
7 71 diversity contained within tropical rainforests [1], [2], [3]. For instance, Ecuador, despite  
8  
9 72 its small size of 283,561 km<sup>2</sup> (roughly 1.5% of South America), is one of the most  
10  
11 73 biologically diverse countries in the world [4], [5]. Biodiversity is fundamentally important  
12  
13  
14 74 to natural and agro-ecosystems; it provides humans with an array of foods and  
15  
16 75 materials, contributes to medical discoveries, furnishes the economy, and supports  
17  
18  
19 76 ecological services that make life on our planet possible [6]. Today species are going  
20  
21 77 extinct at an accelerated rate because of environmental changes caused by human  
22  
23  
24 78 activities including habitat loss, spread of non-native species, pollution, and climate  
25  
26 79 change [7], [8]. All of these threats have put a serious strain on the diversity of species  
27  
28  
29 80 on Earth.

30  
31 81 In the past decade, an ever-growing body of readily accessible knowledge, coupled  
32  
33  
34 82 with new tools in molecular genetics and bioinformatics, have resulted in species being  
35  
36 83 described with greater accuracy, in greater detail, and with additional information to  
37  
38  
39 84 morphological differences. As a result of this increase in quality and content, desirable  
40  
41 85 as it is, the actual process of species description has become slower, while the rate at  
42  
43 86 which species are being lost to extinction has become faster. For many groups of  
44  
45  
46 87 animals, species delimitation can be challenging using solely morphological  
47  
48 88 characteristics [9], [10], and can be improved by incorporating molecular data [11], [12].  
49  
50  
51 89 This is relevant for the conservation of threatened animals because programs or laws  
52  
53 90 can be implemented more effectively when the existence of a species or population is  
54  
55  
56 91 formally described. DNA barcoding, which is a diagnostic technique that utilizes short  
57  
58 92 conserved DNA sequences, has become a popular tool for a variety of studies including  
59  
60  
61  
62  
63  
64  
65

1  
2  
3  
4 93 species identification and molecular phylogenetic inference [13], [14], [15]. Ongoing  
5  
6 94 initiatives, such as 'Barcode of Life' ([www.barcodeoflife.org](http://www.barcodeoflife.org)), seek to identify species  
7  
8  
9 95 and create large-scale reference databases via diagnostic DNA sequences using a  
10  
11 96 standardized approach to accelerate taxonomic progress.

12  
13  
14 97         While projects utilizing standard molecular markers have grown in popularity in  
15  
16 98 the last decade, a fundamental challenge remains in transporting biological material to a  
17  
18  
19 99 site that can carry out the DNA sequencing. Furthermore, complex and overwhelming  
20  
21 100 regulations can impede biological research in biodiverse countries, and can make it  
22  
23 101 challenging to export material out of the country of origin [16], [17]. Additionally, many  
24  
25 102 research institutions in developing parts of the world do not have access to conventional  
26  
27 103 sequencing technologies within the country, further limiting identification options. This is  
28  
29 104 the case for Ecuador, where most laboratories ship their samples internationally to be  
30  
31 105 sequenced, often creating a delay of weeks to months between tissue collection and the  
32  
33 106 availability of the sequence data. Performing genetic analyses on site or at a nearby  
34  
35 107 facility within the country can help to avoid project delays and decrease the risk of  
36  
37 108 sample quality decline associated with extensive transport. Now it has become possible  
38  
39 109 to take portable lab equipment to remote regions, perform *in situ* experiments, and  
40  
41 110 obtain genetic information relevant for biological studies and conservation policies in  
42  
43 111 real-time.

## 44 45 46 112 47 48 113 **Portable Sequencing**

49  
50  
51 114 The MinION (Oxford Nanopore Technologies) is a recently developed nanopore-based  
52  
53 115 DNA sequencing platform. This technology has several advantages over traditional  
54  
55  
56  
57  
58  
59  
60  
61  
62  
63  
64  
65

1  
2  
3  
4  
5  
6  
7  
8  
9  
10  
11  
12  
13  
14  
15  
16  
17  
18  
19  
20  
21  
22  
23  
24  
25  
26  
27  
28  
29  
30  
31  
32  
33  
34  
35  
36  
37  
38  
39  
40  
41  
42  
43  
44  
45  
46  
47  
48  
49  
50  
51  
52  
53  
54  
55  
56  
57  
58  
59  
60  
61  
62  
63  
64  
65

sequencing technologies, including long-read output, low initial startup costs relative to other commercial sequencers, portability, and rapid real-time analysis (reviewed by [18], [19]). Due to its small size (10 x 3.2 x 2 cm), light weight (90 grams) and ease of power and data transfer (a single USB connection to a standard laptop computer), the MinION has emerged as a valuable tool for portable sequencing projects. This device has been applied in remote sites outside of conventional labs including West Africa to monitor the 2014-2015 Ebola outbreak [20] and Brazil for Zika virus outbreak surveillance [21], [22]. It has also been applied in the Antarctic to sequence microbial communities [23], [24], in Tanzania to sequence frog DNA [25], and in Snowdonia National Park, Wales, for shotgun genomic sequencing of closely-related plant species [26]. The MinION has even been run aboard the International Space Station to evaluate performance off-Earth [27], however, the sequencing runs were performed using DNA libraries pre-prepared in a standard laboratory environment, whereas preparing samples outside of a lab with limited infrastructure presents additional challenges. Indeed, nanopore sequencing appears to hold promise for a variety of molecular experiments in the field.

Scientists have mused over the possibility of a portable method for DNA barcoding for over a decade [28], [15] and in this study our goal was to determine if the steps involved in barcoding, including real-time sequencing with the MinION, could be carried out entirely during a field expedition. We specifically targeted DNA barcodes with existing reference databases because they are the standard approach in molecular biodiversity studies, and allowed us to rapidly produce genetic data for the identification of several animal taxa by multiplexing. Our field site was situated in a remote tropical rainforest and did not offer the commodities of a sophisticated laboratory environment,

1  
2  
3  
4  
5  
6  
7  
8  
9  
10  
11  
12  
13  
14  
15  
16  
17  
18  
19  
20  
21  
22  
23  
24  
25  
26  
27  
28  
29  
30  
31  
32  
33  
34  
35  
36  
37  
38  
39  
40  
41  
42  
43  
44  
45  
46  
47  
48  
49  
50  
51  
52  
53  
54  
55  
56  
57  
58  
59  
60  
61  
62  
63  
64  
65

139 including consistent power sources or internet access. We assessed the feasibility for *in*  
140 *situ* genetic sequencing of reptiles and amphibians for rapid species identification, using  
141 a portable laboratory fitting within a single backpack, at one of the world's most  
142 imperiled biodiversity hotspots, the Ecuadorian Chocó rainforest (Fig. 1). We  
143 demonstrate that portable DNA amplicon sequencing with the MinION allows rapid,  
144 accurate, and efficient determination at the species level under remote tropical  
145 environmental conditions, as well as quick turnaround time for DNA barcodes of  
146 undescribed and threatened species at a research facility within the country.

**Analyses**

**Site, sampling, digital photos, tissue collection**

151 We performed all field-based research in the Canandé Reserve (Fig. 1, 0.52993 N,  
152 79.03541 W, 594 m), a 2000 ha. protected area, owned by Jocotoco Foundation  
153 (<http://www.fjocotoco.org/canandeacute1.html>) in Esmeraldas province, northwestern  
154 Ecuador. The reserve is located in the Chocó ecoregion and is approximately 6 hours  
155 by car, depending on road conditions, from the city of Quito. The majority of organisms  
156 sampled in this study were located by space-constrained visual examination of ground-  
157 level substrates [1]. The remaining individuals were detected by turning over logs,  
158 rocks, and other surface objects. All specimens included in the genetic analyses were  
159 morphologically identified based on [2] and [3]. The sample (a tadpole, CJ 7191) of  
160 *Atelopus ignescens* was provided by the Museum of Centro Jambatu, Ecuador and was  
161 preserved in ethanol 95%. We took vouchers for all samples collected and processed in

1  
2  
3  
4  
5  
6  
7  
8  
9  
10  
11  
12  
13  
14  
15  
16  
17  
18  
19  
20  
21  
22  
23  
24  
25  
26  
27  
28  
29  
30  
31  
32  
33  
34  
35  
36  
37  
38  
39  
40  
41  
42  
43  
44  
45  
46  
47  
48  
49  
50  
51  
52  
53  
54  
55  
56  
57  
58  
59  
60  
61  
62  
63  
64  
65

162 the field. These were deposited at the Museo de Zoología of the Universidad  
163 Tecnológica Indoamérica (MZUTI 5375 *Bothriechis schlegelii*, MZUTI 5383  
164 *Lepidoblepharis aff. grandis*. (Gecko 1), MZUTI 5384 *Lepidoblepharis aff. buchwaldi*.  
165 (Gecko 2)).

**Portable laboratory equipment and set-up**

168 The main items for portable laboratory equipment included the following: two MinION  
169 devices, a USB 3.0 cable, three SpotON flow cells (R9.5, Oxford Nanopore  
170 Technologies (ONT)), one miniPCR thermocycler (miniPCR), and a benchtop centrifuge  
171 (USA Scientific), as well as standard laboratory pipettes and sample racks (Fig. 2,  
172 Supplementary Figure 3). The MinKNOW offline software (ONT) required for operation  
173 of the MinION was installed and ran on a Windows Vaio Sony laptop with an external  
174 SSD drive (VisionTek, 240GB). All heat block and temperature cycling steps were  
175 performed using the miniPCR machine, which is a portable thermo-cycler weighing 0.45  
176 kg. The miniPCR was programmed via an application on the laptop and powered by an  
177 external battery (PowerAdd). The total amount of equipment could fit in one carry-on  
178 backpack; a full list of laboratory hardware is provided as Supplementary Table 1.  
179 Reagents for sequencing required frozen transport from the US, which was attained by  
180 use of packaging with cold packs in a Styrofoam box and was later transferred to a  
181 plastic cool box with further cold packs upon arrival to Quito, Ecuador. MinION flow cells  
182 require storage at +2-8°C and were therefore transferred in a food storage container  
183 with chilled cold packs. At the field site, reagents and supplies were stored inside a local  
184 refrigerator and freezer.

1  
2  
3  
4  
5  
6  
7  
8  
9  
10  
11  
12  
13  
14  
15  
16  
17  
18  
19  
20  
21  
22  
23  
24  
25  
26  
27  
28  
29  
30  
31  
32  
33  
34  
35  
36  
37  
38  
39  
40  
41  
42  
43  
44  
45  
46  
47  
48  
49  
50  
51  
52  
53  
54  
55  
56  
57  
58  
59  
60  
61  
62  
63  
64  
65

185

186 **Molecular techniques**

187 Genomic DNA was extracted from fresh blood or tissue samples stored in 95% ethanol  
188 using either the DNeasy Blood & Tissue Kit (Qiagen, Hilden, Germany) according to  
189 manufacturer's protocol and eluted in 100 µl ddH<sub>2</sub>O or a modified salt precipitation  
190 method based on the Puregene DNA purification kit (Gentra Systems) that involved  
191 cellular lysis with SDS and proteinase K, protein precipitation using guanidine  
192 isothiocyanate, and DNA precipitation by isopropanol. Tools for manipulating and lysing  
193 tissues were sterilized with a flame in between processing samples. We amplified the  
194 following mitochondrial DNA fragments: 16S gene using primers 16Sar-L and 16Sbr-H-  
195 R from [4], CytB gene using primers L14910 and H16064 developed by [5], and the  
196 gene coding for subunit 4 of the NADH dehydrogenase with primers ND4 developed by  
197 [6]. All PCR primers contained universal tailed sequences for the Oxford Nanopore  
198 Technologies barcoding kit (Supplementary Table 2). We used the ONT PCR Barcoding  
199 Kit that allows up to 12 different libraries (barcodes 1-12) to be combined and loaded  
200 onto a single flow cell at the same time. PCR reactions contained approximately 1 µl of  
201 PCR product, 2.5 µl 10X PCR buffer, 1 µl 25mM MgCl<sub>2</sub>, 200 µM dNTP mix, 0.2 µM of  
202 each primer and 0.25 Platinum Taq DNA Polymerase (Thermo Fisher Scientific) in a 25  
203 µL total volume. All samples for the first PCR run were amplified on the same miniPCR  
204 under the following settings: initial denaturation: 94°C for 2 minutes, 35 cycles of  
205 denaturation at 94°C for 45 seconds, annealing at 56°C for 60 seconds extension for  
206 72°C for 60 seconds, and a final extension of 72°C for 120 seconds. Then a second  
207 round of PCR was carried out, including 2 µl of ONT PCR Barcode, 2 µL of first-round

1  
2  
3  
4  
5  
6  
7  
8  
9  
10  
11  
12  
13  
14  
15  
16  
17  
18  
19  
20  
21  
22  
23  
24  
25  
26  
27  
28  
29  
30  
31  
32  
33  
34  
35  
36  
37  
38  
39  
40  
41  
42  
43  
44  
45  
46  
47  
48  
49  
50  
51  
52  
53  
54  
55  
56  
57  
58  
59  
60  
61  
62  
63  
64  
65

208 PCR product, 41 µl H<sub>2</sub>O, and 50 µl PCR reaction mix (0.5 µl Taq DNA polymerase, 1 µl  
209 dNTP mix, 2 µl MgCl<sub>2</sub>, 41 µL H<sub>2</sub>O). The second round of PCR barcode conditions  
210 were modified based on ONT protocol for the Platinum Taq polymerase used in this  
211 study as follows: initial denaturation at 95°C for 3 minutes, 15 cycles of denaturation at  
212 95°C for 15 seconds, annealing at 62°C for 15 seconds, extension at 72°C for 60  
213 seconds, and final extension at 72°C for 120 seconds. For verification of samples  
214 sequenced in the field, PCR products were subsequently cleaned with Exonuclease I and  
215 Alkaline Phosphatase (Illustra ExoProStar by GE Healthcare) at the Universidad  
216 Tecnológica Indoamérica (UTI) in Quito and sent to Macrogen Inc (Korea) for Sanger  
217 sequencing. All PCR products were sequenced on an ABI3730XL sequencer in both  
218 forward and reverse directions with the same primers that were used for amplification.  
219 The created sequences were deposited in GenBank (and will be available upon  
220 publication). All original Sanger and MinION generated consensus sequences can be  
221 found in Additional File 1.

222

**MinION sequencing**

223 DNA library preparation was carried out according to the 1D PCR barcoding amplicons  
224 SQK-LSK108 protocol (Oxford Nanopore Technologies). Barcode DNA products were  
225 pooled with 5 µl of DNA CS (a positive control provided by ONT) and an end-repair was  
226 performed (NEB-Next Ultra II End-prep reaction buffer and enzyme mix, New England  
227 Biolabs), then purified using AMPure XP beads. Adapter ligation and tethering was then  
228 carried out with 20 µl Adapter Mix (ONT) and 50 µl of NEB Blunt/TA ligation Master Mix  
229 (New England Biolabs). The adapter ligated DNA library was then purified with AMPure

1  
2  
3  
4  
5  
6  
7  
8  
9  
10  
11  
12  
13  
14  
15  
16  
17  
18  
19  
20  
21  
22  
23  
24  
25  
26  
27  
28  
29  
30  
31  
32  
33  
34  
35  
36  
37  
38  
39  
40  
41  
42  
43  
44  
45  
46  
47  
48  
49  
50  
51  
52  
53  
54  
55  
56  
57  
58  
59  
60  
61  
62  
63  
64  
65

231 beads, followed by the addition of Adapter Bead binding buffer (ONT), and finally eluted  
232 in 15 µl of Elution Buffer (ONT). Each R9 flow cell was primed with 1000 µl of a mixture  
233 of Fuel Mix (Oxford Nanopore Technologies) and nuclease-free water. Twelve  
234 microliters of the amplicon library was diluted in 75 µL of running buffer with 35 µL RBF,  
235 25.5 uL LLB, and 2.5 µL nuclease-free water and then added to the flow cell via the  
236 SpotON sample port. The “NC\_48Hr\_sequencing\_FLO-MIN107\_SQK-  
237 LSK108\_plus\_Basecaller.py” protocol was initiated using the MinION control software,  
238 MinKNOW (offline version provided by ONT).

240 **Bioinformatics**

241 The commands used can be found in the Supplementary Materials and Methods  
242 section.  
243 To retrieve the nucleotide sequences from raw signal data generated by the MinKNOW  
244 software, we used Albacore 1.2.5 (<https://github.com/dvera/albacore>) for base calling  
245 and de-multiplexing of the ONT barcodes. The FAST5 files were then converted to fastq  
246 files using Nanopolish [7]; (<https://github.com/jts/nanopolish>). We then filtered the raw  
247 reads for quality (score of >13) and read length (> 200bp) using Nanofilt  
248 (<https://github.com/wdecoster/nanofilt>), and generated consensus sequences using both  
249 reference-based mapping and *de novo* assembly. For the reference-based mapping we  
250 used BWA 0.7.15 [8]; (<https://github.com/lh3/bwa/releases>) to align the reads to the  
251 reference, samtools 1.3 [9] to process the mapping file, and ANGSD [10], to call the  
252 consensus sequence. The *de novo* assembly of each amplicon was carried out using  
253 Canu [11], (<https://canu.readthedocs.io>), with parameters fitting for our application. Given



1  
2  
3  
4 254 that we used short amplicons for the assembly we set the minimum read length to  
5  
6 255 200bp and the minimum overlap to 50bp. We subsequently extracted the consensus  
7  
8  
9 256 sequences using tgStoreDump. After the consensus calling (for both methods) we  
10  
11 257 mapped the reads back to the consensus sequence (using BWA mem and samtools as  
12  
13  
14 258 described above) and polished the sequencing using Nanopolish [7]. Adapters were  
15  
16 259 removed using Cutadapt [12]. The consensi were then aligned to the Sanger sequences  
17  
18  
19 260 of the same amplicons to investigate the quality of the consensus sequences generated  
20  
21 261 from MinION reads using SeaView [13] and AliView [14]. Sanger sequencing reads  
22  
23  
24 262 were edited and assembled using Geneious R10 software [15] and mapping files  
25  
26 263 inspected by eye using Tablet [16].  
27

28  
29 264 We further tested the impact of coverage on the consensus accuracy by  
30  
31 265 randomly subsampling three sets of 30, 100, 300 and 1,000 reads, respectively for the  
32  
33 266 eyelash palm pitviper and gecko 1. Subsampling was performed with famas  
34  
35  
36 267 (<https://github.com/andreas-wilm/famas>). These sets were assembled *de novo* and  
37  
38 268 processed using the same approach we used for the full data sets (see above).  
39

40  
41 269 We then created species alignments for all barcodes (using sequences obtained  
42  
43 270 from Genbank; accession numbers can be found in the phylogenetic tree  
44  
45 271 reconstructions in the Supplementary material). We inferred the best substitution model  
46  
47  
48 272 using jModelTest [17] and reconstructed their phylogenetic trees using the maximum  
49  
50 273 likelihood approach implemented in Mega 5 [18] with 1,000 bootstrap replicates (for  
51  
52 274 bioinformatics workflow see Fig. 3). The output tree files including the Genbank  
53  
54  
55 275 Accession Numbers are provided in the supplementary material.  
56

57 276  
58  
59  
60  
61  
62  
63  
64  
65

## Results

On July 11, 2017, we arrived at the field site at approximately 1500 hours and collected reptile and amphibian samples from 2000 to 2300 hours. Next, back at the field station, we extracted DNA and performed PCR amplification for 16S, CytB, and ND4 genes. On July 12, the PCR barcodes were pooled, the library was prepared, and then sequencing was initiated at approximately 1600 hours on a flow cell using the offline MinKNOW software, generating 16,663 reads after approximately two hours. The MinKNOW software was then paused in order to assess the reads generated. Within 24 hours of collecting reptiles and amphibians in the Ecuadorian Chocó, we successfully generated consensus sequences for 16S and ND4 genes of an eyelash palm pitviper (*Bothriechis schlegelii*) and 16S for the dwarf gecko (*Lepidoblepharis* sp.; gecko 1). The CytB gene was not successfully sequenced, which was later confirmed at UTI's lab by lack of PCR product on a gel (Supplementary Table 3, Supplementary Figure 4). The field-generated sequence data was analyzed that evening on a laptop using a number of open source and custom-developed bioinformatic workflows (see Materials and Methods). Phylogenetic trees generated using the nanopore sequences and previously generated reference database yielded accurate species identification (Fig. 3 and Fig. 4).

Upon returning to UTI's lab in Quito, we created one additional DNA barcode library with new samples. With our remaining flow cell, we were interested in quickly generating genetic information for (a) additional specimens that were collected during our field expedition (gecko 2), (b) undescribed snake species collected the week before our expedition (Genera: *Dipsas* and *Sibon*), (c) an endangered species that would have

1  
2  
3  
4  
5  
6  
7  
8  
9  
10  
11  
12  
13  
14  
15  
16  
17  
18  
19  
20  
21  
22  
23  
24  
25  
26  
27  
28  
29  
30  
31  
32  
33  
34  
35  
36  
37  
38  
39  
40  
41  
42  
43  
44  
45  
46  
47  
48  
49  
50  
51  
52  
53  
54  
55  
56  
57  
58  
59  
60  
61  
62  
63  
64  
65

300 been difficult to export out of the country (Jambato toad), (d) a rare species lacking  
301 molecular data (Guayaquil blind snake), and (e) combinations of barcoded samples  
302 through multiplexing (for the eyelash palm pitviper and gecko 1).

303           Initially, this second sequencing run appeared to perform well. However, after  
304 using Albacore to demultiplex the reads, we determined the adapter ligation enzyme  
305 likely degraded because the output primarily consisted of adapter sequences  
306 (Supplementary Figure 1, Supplementary Table 1). Nevertheless, we were able to  
307 generate consensus sequences for 16S of the Jambato toad, the two *Dipsas* species,  
308 the dwarf gecko, and the Guayaquil blind snake (Fig. 3 and Fig. 4).

309           The pore count of the flow cells appeared to be unaffected by travel conditions,  
310 as indicated by the multiplexer (MUX) scan, an ONT program that performs a quality  
311 check by assessing flow cell active pore count. The first run in the field had an initial  
312 MUX scan of 478, 357, 177, and 31, for a total of 1,043 active pores and after  
313 approximately two hours of sequencing the flow cell generated 16,484 reads. The  
314 second flow cell ran at UTI had a MUX scan of 508, 448, 277, and 84, for total of 1,317  
315 active pores and the run produced 21,636 reads within two hours. This is notable since  
316 this run was performed 8 days after arriving in Ecuador and the flow cell was stored at  
317 suboptimal conditions on site and during travel. The presence or absence of PCR  
318 product and size was later determined by gel electrophoresis and quantified by a  
319 Quantus Fluorometer (Promega) at UTI. Amplification for 16S and ND4 was successful  
320 for all samples, but amplification of CytB was unsuccessful, perhaps due to suboptimal  
321 PCR settings, as samples were run concurrently due to the limitation and time-  
322 constraint of having only one miniPCR machine available (Supplementary Figure 4).

1  
2  
3  
4  
5  
6  
7  
8  
9  
10  
11  
12  
13  
14  
15  
16  
17  
18  
19  
20  
21  
22  
23  
24  
25  
26  
27  
28  
29  
30  
31  
32  
33  
34  
35  
36  
37  
38  
39  
40  
41  
42  
43  
44  
45  
46  
47  
48  
49  
50  
51  
52  
53  
54  
55  
56  
57  
58  
59  
60  
61  
62  
63  
64  
65

323 While the ONT protocol calls for equimolar ratios of pooled PCR product, we did not  
324 have an accurate way of quantifying DNA in the field and as such had an  
325 overrepresentation of 16S sequences, likely due to PCR bias. On future field  
326 expeditions, an inexpensive device such as the bluegel DNA electrophoresis (produced  
327 by miniPCR) can be used to assess DNA and PCR products.

328

**Sequencing and Bioinformatics**

*Eyelash Palm Pitviper (Bothriechis schlegelii)*

331 The eyelash palm pitviper (*B. schlegelii*) is an iconic venomous pitviper species found in  
332 mesic forests of Central and northwestern South America [3]. One individual was  
333 captured on the evening of the 11th of July 2017 and sequenced on the MinION the  
334 following evening. We obtained 3,696 reads for the 16S fragment, 65 reads for CytB,  
335 and 94 for ND4. The 16S reads showed an average length of 655bp including the  
336 sequencing adapters. The best contig created by Canu was based on 55 reads, to  
337 which 3,695 reads mapped for the polishing step. The consensus sequence was 501bp  
338 and showed a 100% nucleotide match to the respective Sanger sequence. For this  
339 species, we did not find any differences between the *de novo* and the reference-based  
340 mapping consensus sequences (generated by mapping against a reference from the  
341 same species). The individual clusters with all other *B. schlegelii* and *B. supraciliaris*  
342 (considered by some authors to be conspecific with *B. schlegelii*) sequences in the  
343 phylogenetic tree (Fig. 4A). While the CytB *de novo* assembly did not succeed (no two  
344 reads assembled together), the best supported contig for ND4 (864bp) was based on 50

1  
2  
3  
4  
5  
6  
7  
8  
9  
10  
11  
12  
13  
14  
15  
16  
17  
18  
19  
20  
21  
22  
23  
24  
25  
26  
27  
28  
29  
30  
31  
32  
33  
34  
35  
36  
37  
38  
39  
40  
41  
42  
43  
44  
45  
46  
47  
48  
49  
50  
51  
52  
53  
54  
55  
56  
57  
58  
59  
60  
61  
62  
63  
64  
65

345 sequences and achieved an accuracy of 99.4% after polishing (using 95 reads that  
346 mapped to the *de novo* consensus).

347

348 *Dwarf Geckos (Genus: Lepidoblepharis)*

349 Dwarf geckos (genus: *Lepidoblepharis*) are small bodied leaf litter geckos found in  
350 Central and South America. Dwarf geckos can be difficult to identify in the field and it is  
351 suspected that there are several cryptic species within this genus in Ecuador. We  
352 captured two individuals on the evening of the 11th of July 2017, and because the two  
353 geckos differed in the shape and size of the dorsal scales (Fig. 3B) and were difficult to  
354 confidently identify by morphological characters, we decided to investigate them further  
355 with DNA barcoding.

356

357 *Gecko 1 (Lepidoblepharis aff. grandis)*

358 Gecko 1 was included in the first sequencing run in the field. We obtained 4,834 reads  
359 for the 16S fragment, 63 reads for CytB, and 76 for ND4. The consensus sequence  
360 (522bp) for this individual showed a 100% nucleotide match to the respective Sanger  
361 sequence. We then performed reference-based mapping using *L. xanthostigma*  
362 (Genbank accession: KP845170) as a reference and the resulting consensus had  
363 99.4% accuracy. We found three insertions compared to the Sanger and the *de novo*  
364 consensus sequences (position 302: G and 350-351: AA). Next we attempted  
365 assemblies for CytB and ND4. While the assembly for the CytB reads failed, we were  
366 able to assemble the ND4 reads. However, the polished consensus sequence showed a  
367 relatively high error rate compared to the Sanger sequence (92.1% accuracy). We then

1  
2  
3  
4  
5  
6  
7  
8  
9  
10  
11  
12  
13  
14  
15  
16  
17  
18  
19  
20  
21  
22  
23  
24  
25  
26  
27  
28  
29  
30  
31  
32  
33  
34  
35  
36  
37  
38  
39  
40  
41  
42  
43  
44  
45  
46  
47  
48  
49  
50  
51  
52  
53  
54  
55  
56  
57  
58  
59  
60  
61  
62  
63  
64  
65

368 blasted all ND4 reads against NCBI. For ND4 we found 8 sequences to blast to ND4  
369 from squamates, 4 to 16S (3 to a viper and 1 to a gecko), 3 to the positive control, 10  
370 very short hits (negligible hits), and 46 to find no blast hit. Interestingly, while only 8  
371 reads were hits for ND4 from squamates, 72 reads mapped to the consensus of the *de*  
372 *novo* assembly. The higher error rate can thus be explained by the fact that contaminant  
373 reads were used to assemble and correct consensus. The *de novo* assembled  
374 consensus showed an accuracy of 91.7% compared to 92.1% for the polished  
375 sequence.

376  
377 *Gecko 2 (Lepidoblepharis aff. buchwaldi)*

378 Gecko 2 was included in the second sequencing run at UTI. We generated 325 reads  
379 (for more information see discussion on the possible issue with the adapter ligation  
380 enzyme). After filtering for read quality and assembly, we found the best contig to be  
381 supported by 30 reads. Out of the 325 barcoded reads, we found 308 to map to the  
382 consensus. After running Nanopolish, we found it to match 98.4% to the Sanger  
383 sequence. All of the observed differences were indels (mostly 1 bp, but also one 4 bp  
384 indel; positions: 15, 23, 217 and 250-253, respectively, Fig. 4B). Positions 15 and 23  
385 show an A in the reference, which is not found in the nanopore consensus (filtered or  
386 unfiltered, and polished or not polished). Position 217 is a C in the Sanger reference.  
387 None of the consensi for the nanopore data showed the C. This error can potentially be  
388 explained as it lies within a 6 bp cytosine homopolymer (see Lu et al., 2016).  
389 Interestingly, we saw only a 1bp mismatch instead of the 4bp indel at position 250-253  
390 in the filtered, but not polished nanopore consensus sequence. After polishing all

1  
2  
3  
4  
5  
6  
7  
8  
9  
10  
11  
12  
13  
14  
15  
16  
17  
18  
19  
20  
21  
22  
23  
24  
25  
26  
27  
28  
29  
30  
31  
32  
33  
34  
35  
36  
37  
38  
39  
40  
41  
42  
43  
44  
45  
46  
47  
48  
49  
50  
51  
52  
53  
54  
55  
56  
57  
58  
59  
60  
61  
62  
63  
64  
65

391 sequences (filtered or unfiltered) showed the 4bp indel. We next applied reference  
392 based mapping (same protocol and reference as for gecko 1). The resulting consensus  
393 sequence showed an accuracy of 97.9%. Phylogenetic tree reconstruction shows that  
394 gecko 1 and gecko 2 are clearly two distinct species (see Fig. 4B).

395  
396 *Jambato toad (Atelopus ignescens)*

397 Laboratory processing and sequencing for *Atelopus ignescens* was carried out in the  
398 lab at UTI using a preserved tadpole sample. We obtained 503 reads for this species.  
399 The best supported *de novo* assembled contig was based on 56 reads. We then  
400 mapped the reads back to this contig for the polishing step, which resulted in 491  
401 mapped reads. However, while the total coverage was 434x for the segment, the  
402 average coverage was only 212x. The discrepancy can be explained by a high  
403 percentage of reads that exclusively consisted of adapter sequences (probably caused  
404 by inefficient adapter ligation; see Discussion section; Supplementary Figure 1). The  
405 resulting sequence fits 100% to the respective Sanger sequence (Fig. 4C). We next  
406 used the reference-based approach to construct a consensus sequence, using *Atelopus*  
407 *hoogmoedi* (Genbank accession: EU672974) as a reference and the consensus  
408 achieved an accuracy of 100% after polishing. The phylogenetic tree reconstruction  
409 clusters our sequence with samples described as *A. sp. aff. ignescens*.

410  
411 *Guayaquil blind snake (Trilepida guayaquilensis)*

412 The Guayaquil blind snake (*Trilepida guayaquilensis*) belongs to the family of Slender  
413 blind snakes (Leptotyphlopidae). This family is found in North and South America, Asia,

1  
2  
3  
4  
5  
6  
7  
8  
9  
10  
11  
12  
13  
14  
15  
16  
17  
18  
19  
20  
21  
22  
23  
24  
25  
26  
27  
28  
29  
30  
31  
32  
33  
34  
35  
36  
37  
38  
39  
40  
41  
42  
43  
44  
45  
46  
47  
48  
49  
50  
51  
52  
53  
54  
55  
56  
57  
58  
59  
60  
61  
62  
63  
64  
65

414 and Africa. They are fossorial snakes adapted to life underground. The Guayaquil blind  
415 snake was only known from one individual described in 1970 and is endemic to Ecuador  
416 [19]. For a second specimen collected by Jose Vieira on March 03, 2016 at Pacoche,  
417 province of Manabi, Ecuador (S1.0677 W80.88169 323m), we obtained 756 sequences.  
418 However, many of those reads were adapter sequences. The Canu *de novo* assembled  
419 sequence was generated from 16 reads. We then mapped 740 reads back to this  
420 consensus. After polishing the consensus sequence matched 100% of the Sanger  
421 generated sequence (Fig. 5A; 516bp consensus length). We further investigated the  
422 accuracy of reference based mapping for this species. We used *Trilepida macrolepis*  
423 (Genbank accession: GQ469225) as a reference, which is suspected to be a close  
424 relative of *T. guayaquilensis*. However, the resulting consensus sequence had a lower  
425 accuracy (97.7%) compared to the *de novo* assembled consensus (100%). Our  
426 sequence is sister to the clade comprising *Trilepida macrolepis* and all *Rena* species in  
427 the phylogenetic tree.

428  
429 *Dipsas snakes (Genus: Dipsas)*

430 *Dipsas* are non-venomous New World colubrid snakes that are found in Central and  
431 South America (Cadle 2005). Here we included two specimens collected one week prior  
432 to our expedition.

433  
434 *Dipsas oreas* (MZUTI 5418)

435 We generated 779 reads for *Dipsas oreas* (MZUTI5418). The best supported contig of  
436 the Canu *de novo* assembly (498bp consensus length) was based on 59 reads and



1  
2  
3  
4 437 matched the corresponding Sanger sequence to 99% after polishing (Fig. 5B). Three  
5  
6  
7 438 out of 5 mismatches were indels in poly-A stretches (position: 185, 287, 411). The  
8  
9 439 remaining two mismatches are a C to G at position 469 and a T to A at position 489 for  
10  
11 440 the nanopore compared to the Sanger sequence. Interestingly, the reference-based  
12  
13  
14 441 consensus sequence (using *Dipsas* sp., GenBank accession: KX283341 as a  
15  
16 442 reference) matched the Sanger sequence to 99.4% after polishing. We generated 816  
17  
18  
19 443 reads for the CytB barcode. However, *de novo* assembly was not successful as only  
20  
21 444 three reads blasted to CytB. However, the lengths of the hits were insignificant. Two  
22  
23  
24 445 sequences blasted to 16S, one blasted to a Dipsadine snake and one to *Atelopus*. One  
25  
26 446 read belonged to the positive control and 53 showed insignificantly short hits.  
27  
28

29 447

30

31

32 448

#### *Dipsas oreas* (MZUTI 5415)

33

34 449

We generated 487 reads for *Dipsas* (MZUTI 5415). Sequences with a quality score of

35

36

37 450

>13 were retained resulting in 193 sequences. The best supported contig of the Canu

38

39 451

*de novo* assembly was based on 59 reads (498bp consensus length). After polishing

40

41 452

the consensus sequence matched the corresponding Sanger sequence to 98.9% (Fig.

42

43 453

5B). The first two mismatches are typical nanopore errors, namely indels in poly-A

44

45 454

stretches (positions: 287, 411). The nanopore sequence shows an insertion of a single

46

47 455

G compared to the Sanger sequence as position 431. The last mismatch is a three base

48

49 456

pair deletion compared to the Sanger sequence (positions: 451-453). The reference-

50

51 457

based consensus (using *Dipsas* sp., GenBank accession: KX283341 as a reference)

52

53 458

achieved a 98.4% match after polishing. We generated 1,077 reads for the CytB

54

55 459

barcode. Again, *de novo* assembly was not successful as only four reads actually

56

57

58

59

60

61

62

63

64

65

1  
2  
3  
4 460 belonged to CytB. Four sequences belonged to the positive control, seven to 16S (four  
5  
6  
7 461 blasted to Colubridae, and three to squamates), one to a Viperidae microsatellite, and  
8  
9 462 51 gave insignificantly short hits. The two *Dipsas* specimens clustered together in the  
10  
11  
12 463 phylogeny. They are sister to the clade comprising *D. neivai* and *D. variegata*. However,  
13  
14 464 this part of the phylogeny shows low support (bootstraps < 50).

15  
16 465

17  
18  
19 466 *Sibon* sp. (Genus: *Sibon*)

20  
21 467 *Sibon* snakes are found in northern South America, Central America and Mexico [20].

22  
23  
24 468 We generated 339 reads for the 16S barcode of this species. However, we were not

25  
26 469 able to create a consensus sequence for this barcode, as almost all the reads were

27  
28  
29 470 adapter sequences (all but 11 reads). Furthermore, we generated 1,425 reads for the

30  
31 471 CytB barcode but were not able to create a consensus sequence.

32  
33 472

34  
35  
36 473 *Subsampling*

37  
38 474 We further investigated the read depth needed to call accurate consensus sequences

39  
40  
41 475 using our approach. We used the eyelash palm pitviper and gecko 1 to test

42  
43 476 subsampling schemes, since we obtained thousands of reads for these samples. We

44  
45  
46 477 randomly subsampled to 30, 100, 300 and 1,000 reads (in three replicates; see

47  
48 478 Supplementary Table 4). For the eyelash palm pitviper we achieved accuracies ranging

49  
50  
51 479 from 99.4% to 99.8% using only 30 reads, 99.6% to 100% using 100 reads, 99.8% for

52  
53 480 300 reads and 99.8% to 100% for 1,000 reads. For gecko 1 we achieved even better

54  
55 481 accuracy overall, with 30 reads ranging from 99.4% to 99.8%, 100 reads from 99.8% to

56  
57  
58  
59  
60  
61  
62  
63  
64  
65

1  
2  
3  
4 482 100%, all 300 reads sets achieved an accuracy of 100% and for 1,000 reads all but one  
5  
6 483 set (99.8%) achieved 100% accuracy.  
7  
8

9 484  
10  
11 485 *Multiplexing*  
12  
13  
14 486 We further sequenced multiplexed barcodes (16S and ND4) for the eyelash palm  
15  
16 487 pitviper and gecko 1. However, we did not obtain reads for this sample from sequencing  
17  
18  
19 488 run 2, most likely due to the adapter ligation issues. We thus generated artificial  
20  
21 489 multiplexes for the eyelash palm pitviper pooling random sets of 1,000 16S reads with  
22  
23 490 all 96 ND4 reads to investigate the performance of the *de novo* assembly using  
24  
25  
26 491 multiplexed samples. We assembled the reads *de novo* and processed them using the  
27  
28  
29 492 same approach as discussed above. In all three cases, we found the first two contigs of  
30  
31 493 the canu run to be 16S and ND4 contigs. After polishing the 16S consensus sequences  
32  
33 494 achieved a 99.8% accuracy (all three assemblies showed a deletion in a stretch of four  
34  
35  
36 495 T's compared to the Sanger sequence) and the ND4 sequences a 99.4% accuracy. All  
37  
38 496 errors, but one (which shows a T compared to the C in the Sanger sequence), in ND4  
39  
40  
41 497 are deletions in homopolymer stretches.  
42

43 498  
44

45 499 **Discussion**  
46  
47

48 500  
49

50 501 **Performance in the field**  
51  
52

53 502 Our objective was to employ a portable laboratory in a rainforest to quickly identify  
54  
55 503 endemic species with DNA barcoding (Fig. 2). Our protocols resulted in successful DNA  
56  
57  
58 504 extraction, PCR amplification, nanopore sequencing, and barcode assembly, with a  
59  
60  
61  
62  
63  
64  
65

1  
2  
3  
4 505 turnaround time of less than 24 hours. We observed that the MinION sequencing  
5  
6 506 platform performed well in the field after extended travel, indicating the potential for  
7  
8  
9 507 nanopore-based sequencing on future field expeditions. Although we demonstrate that  
10  
11 508 the successful molecular identification of organisms in a remote tropical environment is  
12  
13  
14 509 possible, challenges with molecular work in the field remain. Our field site was provided  
15  
16 510 with inconsistent electrical power, but still allowed us to use a conventional small  
17  
18  
19 511 centrifuge for several steps of DNA extraction and to power a refrigerator for storage of  
20  
21 512 flow cells and some of the reagents, although temperatures were likely suboptimal. Lack  
22  
23  
24 513 of electrical supply can impede adequate storage of temperature-sensitive reagents for  
25  
26 514 extended periods of time. Our experiments were performed during a relatively short field  
27  
28  
29 515 trial, with 10 days being the longest time period that reagents were kept at inconsistent  
30  
31 516 freezing temperatures. It is uncertain how well nanopore kit reagents or flow cell  
32  
33  
34 517 integrity would endure over longer periods without consistent cooling temperatures, and  
35  
36 518 we suspect the adapter ligation enzyme was compromised during our second nanopore  
37  
38 519 run, as demultiplexing led to a majority of barcode adapters in each folder  
39  
40  
41 520 (Supplementary Table 3). While the MinION sequencer fits in the palm of a hand and  
42  
43 521 needs only a USB outlet to function, bioinformatic analyses can be hampered under  
44  
45  
46 522 remote field conditions, because internet access, large amounts of data storage, and  
47  
48 523 long periods of time are often required for such analytical tasks. In our study, utilizing  
49  
50  
51 524 short DNA fragments with a relatively small number of samples for barcoding allowed us  
52  
53 525 to perform all bioinformatic analyses in the field, but larger data outputs may require  
54  
55 526 additional storage and more computational resources.  
56  
57  
58 527

1  
2  
3  
4  
5  
6  
7  
8  
9  
10  
11  
12  
13  
14  
15  
16  
17  
18  
19  
20  
21  
22  
23  
24  
25  
26  
27  
28  
29  
30  
31  
32  
33  
34  
35  
36  
37  
38  
39  
40  
41  
42  
43  
44  
45  
46  
47  
48  
49  
50  
51  
52  
53  
54  
55  
56  
57  
58  
59  
60  
61  
62  
63  
64  
65

#### 528 **Implications for conservation and biodiversity assessments**

529 Tropical rainforests, such as the Ecuadorian Chocó, are often rich in biodiversity, as  
530 well as species of conservation concern. The Chocó biogeographical region is one of  
531 the world's 25 biodiversity hotspots [29] and several studies have identified the Chocó  
532 region of western Colombia and Ecuador as a global conservation priority [29], [30],  
533 [31]. We therefore chose this region for proof of principle *in situ* molecular work to  
534 highlight the importance of expediting fieldwork in order to produce genetic information  
535 of endemic fauna. Our rapidly obtained DNA barcodes allowed us to accurately identify  
536 organisms while in the field. When samples are not required to be exported out of the  
537 country to carry out molecular experiments, real-time sequencing information can  
538 contribute to more efficient production of biodiversity reports that advise conservation  
539 policy, especially in areas of high conservation risk.

540         Of particular note in this study was the critically endangered harlequin Jambato  
541 toad, *Atelopus ignescens*. Although not a denizen of the Chocó rainforests, this Andean  
542 toad is a good example to demonstrate how nanopore sequencing can aid in the  
543 conservation of critically endangered species. *Atelopus ignescens* was previously  
544 presumed extinct (it is currently still listed as “extinct” on IUCN; [32]) and was only  
545 recently rediscovered [33]. The last confirmed record of *Atelopus ignescens* dates back  
546 to 1988, and this species was presumed to be extinct before one population was  
547 rediscovered in 2016, 28 years later. *Atelopus* is a species-rich genus of neotropical  
548 toads containing 96 species, most of which are possibly extinct or endangered. In  
549 Ecuador there are 11 species of *Atelopus* that are Critically Endangered (tagged as  
550 Possibly extinct; [34]). Extinctions of *Atelopus* (and other anurans) are beyond control

1  
2  
3  
4  
5  
6  
7  
8  
9  
10  
11  
12  
13  
14  
15  
16  
17  
18  
19  
20  
21  
22  
23  
24  
25  
26  
27  
28  
29  
30  
31  
32  
33  
34  
35  
36  
37  
38  
39  
40  
41  
42  
43  
44  
45  
46  
47  
48  
49  
50  
51  
52  
53  
54  
55  
56  
57  
58  
59  
60  
61  
62  
63  
64  
65

551 and are increasingly exacerbated by a combination of factors including habitat loss,  
552 climate change and pathogens [35], [36], [37]. For the many endangered species that  
553 are protected by international laws and treaties, sample transport requires permits that  
554 can often be difficult to obtain, even when research is expressly aimed at conservation,  
555 resulting in project delays that can further compromise sample quality. By working within  
556 the country, under permits issued by Ministerio del Ambiente de Ecuador to local  
557 institutions, we were able to generate sequence data for the endangered harlequin  
558 Jambato toad *Atelopus ignescens* within 24 hours of receiving the tissue, whereas  
559 obtaining permits to ship samples internationally in the same time frame would have not  
560 been possible. Rapidly identifying the phylogenetic affinity of populations of *Atelopus*  
561 toads could speed up conservation efforts for these animals. Namely, a better  
562 understanding of the systematics of the group facilitated by real-time sequencing could  
563 help establish species limits, geographic distributions, in-situ conservation actions and  
564 ex-situ breeding programs.

565

**Species identifications**

567 It is important to note that we do not intend for rapidly-obtained portable sequence  
568 information to substitute for standard species description processes. Instead, we aim to  
569 demonstrate that obtaining real-time genetic information can have beneficial  
570 applications for biologists in the field, such as raising the interesting possibility of  
571 promptly identifying new candidate species, information which can be used to adjust  
572 fieldwork strategies or sampling efforts. As we have shown, the latter could be  
573 especially important with organisms and habitats facing pressing threat. Rapidly

1  
2  
3  
4  
5  
6  
7  
8  
9  
10  
11  
12  
13  
14  
15  
16  
17  
18  
19  
20  
21  
22  
23  
24  
25  
26  
27  
28  
29  
30  
31  
32  
33  
34  
35  
36  
37  
38  
39  
40  
41  
42  
43  
44  
45  
46  
47  
48  
49  
50  
51  
52  
53  
54  
55  
56  
57  
58  
59  
60  
61  
62  
63  
64  
65

574 obtaining genetic sequence information in the field can also be useful for a range of  
575 other applications, including identifying cryptic species, hybrid zones, immature stages,  
576 and species-complexes.

577 Furthermore, we acknowledge that in most cases multiple loci are needed to  
578 reliably infer species position in a phylogenetic tree. DNA barcoding has been shown to  
579 hold promise for identification purposes in taxonomically well-sampled clades, but may  
580 have limitations or pitfalls in delineating closely related species or in taxonomically  
581 understudied groups [38], [39]. However, our aim in this study was to demonstrate that  
582 portable sequencing can be used in the field and that the final sequences have an  
583 accuracy needed to achieve reliable identification of a specimen. While a recent study  
584 has demonstrated a field-based shotgun genome approach with the MinION to identify  
585 closely related plant species [26], DNA barcoding already offers a robust reference  
586 database for many taxa thanks in part to global barcoding initiatives (the current  
587 Barcode of Life Data System contains 4,013,927 specimens and 398,087 Barcode  
588 Index Numbers <http://ibol.org/resources/barcode-library/> as of September 2017).

589 Finally, while highlighting the value of real-time portable DNA barcoding in this  
590 study, we do not wish to downplay the significance of taxonomic experts, who have  
591 invaluable specialist knowledge about specific groups of organisms. Even with the  
592 advent of molecular diagnostic techniques to describe and discover species, placing  
593 organisms within a phylogenetic context based on a solid taxonomic foundation is  
594 necessary. An integrative approach utilizing molecular data and morphological  
595 taxonomy can lead to greater insight of biological and ecological questions [40]. As  
596 noted by Bik, 2017, *“There is much to gain and little to lose by deeply integrating*

1  
2  
3  
4  
5  
6  
7  
8  
9  
10  
11  
12  
13  
14  
15  
16  
17  
18  
19  
20  
21  
22  
23  
24  
25  
26  
27  
28  
29  
30  
31  
32  
33  
34  
35  
36  
37  
38  
39  
40  
41  
42  
43  
44  
45  
46  
47  
48  
49  
50  
51  
52  
53  
54  
55  
56  
57  
58  
59  
60  
61  
62  
63  
64  
65

597 *morphological taxonomy with high-throughput sequencing and computational*  
598 *workflows.”*

599

600 **Bioinformatic challenges**

601 While we were able to show that nanopore sequencing results in high quality DNA  
602 barcode sequences, some challenges during the read processing remain. To our  
603 knowledge, no software solution specifically designed to assemble DNA barcodes from  
604 long read technologies is available. Here, we created our own pipeline (Supplementary  
605 Figure 2). This required changing the settings for Canu [41], a whole genome *de novo*  
606 assembler (see Materials and Methods in the Supplementary Information; and  
607 discussion below). However, software geared towards the specifics of assembling DNA  
608 barcodes from long read data would be beneficial to make the bioinformatics analysis  
609 easier and more widely applicable.

610 We were also interested in investigating the minimum coverage needed to create  
611 reliable consensus sequences. Therefore, we used different subsampling schemes.  
612 Overall, a coverage of 30 reads achieved an accuracy of 99.4 - 99.8%. With 100x read  
613 coverage almost all assemblies were 100% accurate, indicating that an excessive  
614 number of reads is not needed to produce high quality consensus sequences.  
615 Furthermore, we applied Nanopolish to all consensus sequences. This tool has been  
616 shown to be very effective at correcting typical nanopore errors, such as homopolymer  
617 errors [42], [43]. As can be seen in section “Post-Nanopolish assembly identity” in [43],  
618 accuracy of the resulting consensus increases significantly after polishing. While, we did  
619 not measure the improvement in accuracy in our study, we did notice a high accuracy



1  
2  
3  
4 620 after polishing. However, as can be seen in Fig. 4B, nanopolish is not always able to  
5  
6 621 accurately correct homopolymer stretches.  
7  
8

9 622 We further tested reference-based mapping versus *de novo* assembly, because  
10  
11 623 a reference-based mapping approach may introduce bias, making it possible to miss  
12  
13  
14 624 indels. Overall, we see that consensus sequences generated using reference-based  
15  
16 625 mapping have slightly lower accuracy. However, in two cases (the eyelash palm pitviper  
17  
18  
19 626 and the Jambato toad) an accuracy of 100% was achieved with reference-based  
20  
21 627 mapping. Interestingly, in the case of *Dipsas* sp. (MZUTI 5418), reference-based  
22  
23  
24 628 mapping resulted in a slightly better accuracy than the *de novo* approach (99.4%  
25  
26 629 compared to 99%). However, in general, we recommend the use of a *de novo* assembly  
27  
28  
29 630 approach as this method can be applied even if no reference sequence is available and  
30  
31 631 generally produced more accurate sequences. An alternative approach would be to  
32  
33 632 generate consensus sequences by aligning the individual reads for each barcode to one  
34  
35  
36 633 another, which would not be affected by a reference bias. This method is implemented  
37  
38 634 in the freely available software tool Allele Wrangler ([https://github.com/transplantation-](https://github.com/transplantation-immunology/allele-wrangler/)  
39  
40  
41 635 [immunology/allele-wrangler/](https://github.com/transplantation-immunology/allele-wrangler/)). However, at the time of submission this tool picks the first  
42  
43 636 read as the pseudo reference, which can lead to errors in the consensus if this read is  
44  
45  
46 637 of particularly low quality or an incorrect (contaminant) sequence. Future developments  
47  
48 638 might establish this method as an alternative to *de novo* assembly algorithms, which are  
49  
50 639 typically written for larger genomes (e.g. the minimum genome size in Canu is 1000bp)  
51  
52  
53 640 and can have issues with assemblies where the consensus sequence is roughly the  
54  
55 641 size of the input reads (*personal communications* Adam Phillippy).  
56  
57  
58  
59  
60  
61  
62  
63  
64  
65

1  
2  
3  
4  
5  
6  
7  
8  
9  
10  
11  
12  
13  
14  
15  
16  
17  
18  
19  
20  
21  
22  
23  
24  
25  
26  
27  
28  
29  
30  
31  
32  
33  
34  
35  
36  
37  
38  
39  
40  
41  
42  
43  
44  
45  
46  
47  
48  
49  
50  
51  
52  
53  
54  
55  
56  
57  
58  
59  
60  
61  
62  
63  
64  
65

642           Each of our two runs showed a very high number of reads not assigned to any  
643 barcode sequence after de-multiplexing with Albacore 1.2.5 (7,780 and 14,272 for the  
644 first and second sequencing run, respectively). In order to investigate whether these  
645 reads belong to the target DNA barcodes but did not get assigned to sequencing  
646 barcodes, or if they constitute other sequences, we generated two references (one for  
647 each sequencing run) comprising all consensi found within each individual sequencing  
648 run. We then mapped all reads not assigned to barcodes back to the reference. We  
649 were able to map 2,874 and 4,997 reads to the reference for the first and the second  
650 sequencing run, respectively, which shows that a high number of reads might be usable  
651 if more efficient de-multiplexing algorithms become available. Here we used Albacore  
652 1.2.5, an ONT software tool, to de-multiplex the sequencing barcodes. This tool is under  
653 constant development and thus might offer more efficient de-multiplexing in later  
654 versions. Alternatively, 3rd party software tools like npBarcode [44] or Porechop  
655 (<https://github.com/rrwick/Porechop>) can be used.

**Cost-effectiveness and local resource development**

656  
657  
658 Next-generation sequencing technologies are constantly evolving, along with their  
659 associated costs. Most major next-generation sequencing platforms require  
660 considerable initial investment in the sequencers themselves, costing hundreds of  
661 thousands of dollars, which is why they are often consolidated to sequencing centers at  
662 the institutional level [45]. In this study, we used the ONT starter pack, which currently  
663 costs \$1000, and includes two flow cells and a library preparation kit (6 library  
664 preparations), as well as the ONT 12 barcoding kit which is currently \$250 for 6 library

1  
2  
3  
4 665 preparations (for a full list of equipment and additional reagents see Supplementary  
5  
6 666 Table 1). Using this setup, each barcode amplicon sequence generated costs  
7  
8  
9 667 approximately \$45 (this includes cost for the starter pack, etc; a detailed cost account  
10  
11 668 can be found in the Supplementary material). At this cost, further multiplexing of  
12  
13  
14 669 samples on each flow cell is necessary to achieve a cost-effectiveness for DNA  
15  
16 670 sequencing relative to other commercial options. However, it will likely not be long until  
17  
18  
19 671 much higher multiplexing (>500 samples) becomes achievable on the MinION platform,  
20  
21 672 which would pave the way for MinION-based DNA barcode costs to be reduced to less  
22  
23  
24 673 than \$1, similar to advancements achieved in Illumina and PacBio-based pipelines (see  
25  
26 674 [46], [47], [48]). On the contrary, Sanger sequencing from UTI in Ecuador shipped  
27  
28  
29 675 internationally for processing costs approximately \$10 per sample, independent of the  
30  
31 676 through-put. Thus, the Oxford Nanopore MinION has the potential to be a cost-effective  
32  
33  
34 677 sequencing option for resource-limited labs, especially in developing countries without  
35  
36 678 access to standard sequencing devices.

37  
38 679         The small size and low power requirements of the MinION will likely continue to  
39  
40  
41 680 enable its evolution as a field-deployable DNA sequencing device, opening up new  
42  
43 681 avenues for biological research in areas where the typical laboratory infrastructure for  
44  
45  
46 682 genetic sequencing is unavailable. With some training, in the field molecular analyses  
47  
48 683 could also potentially be performed by students (see [49]) or assistants, providing an  
49  
50  
51 684 opportunity for local teaching and research capacity building, and community  
52  
53 685 involvement via research focused ecotourism or citizen-science projects.

54  
55 686

56  
57  
58 687 **Future outlook**

59  
60  
61  
62  
63  
64  
65

1  
2  
3  
4  
5  
6  
7  
8  
9  
10  
11  
12  
13  
14  
15  
16  
17  
18  
19  
20  
21  
22  
23  
24  
25  
26  
27  
28  
29  
30  
31  
32  
33  
34  
35  
36  
37  
38  
39  
40  
41  
42  
43  
44  
45  
46  
47  
48  
49  
50  
51  
52  
53  
54  
55  
56  
57  
58  
59  
60  
61  
62  
63  
64  
65

688 Technological developments in lab equipment and reagent chemistry are increasingly  
689 enabling the incorporation of genetic analyses into field projects. Several portable  
690 technologies have been used to perform molecular experiments in the field, particularly  
691 for disease diagnostics [50], [51]. Advances in lyophilized and room-temperature  
692 reagents are also promising for field applications, such as EZ PCR Master Mix [52], and  
693 loop-mediated isothermal amplification [53], [54]. A hand-powered centrifuge [55] could  
694 also act as substitute for a standard benchtop centrifuge during DNA extraction steps.  
695 Automatic devices, such as VolTRAX (a compact microfluidic device designed to  
696 automate nanopore library preparation, ONT) and improved library construction  
697 methods may offer faster and high-throughput methods for preparing nanopore libraries  
698 in the future. As the ONT MinION evolves, it could greatly advance field researchers'  
699 capacity to obtain genetic data from wild organisms while in the field. These  
700 technologies currently depend on reagents that require freezing, but can be used at field  
701 sites with solar or portable freezer options. Faster and more automated sample  
702 processing, as well as cost reductions, are needed for adoption in low-income settings.

703           Beyond short PCR-based amplicons aimed at species identification, other  
704 exciting potential applications of nanopore sequencing in the field include sequencing of  
705 entire mitochondria from gDNA samples [56] or via long-range PCR, shotgun genome  
706 sequencing [26], analysis of environmental DNA [57], [24], sequencing of direct RNA  
707 [58], [59] or cDNA to rapidly profile transcriptomes ([60], and pathogen diagnostics and  
708 monitoring (such as chytrid fungus; [61]). Rapid portable sequencing can also be  
709 applied to wildlife crime to perform species identification of animals affected by illegal

1  
2  
3  
4  
5  
6  
7  
8  
9  
10  
11  
12  
13  
14  
15  
16  
17  
18  
19  
20  
21  
22  
23  
24  
25  
26  
27  
28  
29  
30  
31  
32  
33  
34  
35  
36  
37  
38  
39  
40  
41  
42  
43  
44  
45  
46  
47  
48  
49  
50  
51  
52  
53  
54  
55  
56  
57  
58  
59  
60  
61  
62  
63  
64  
65

710 trafficking, as well as serve to aid in early detection of invasive species threatening local  
711 biodiversity and agriculture, and emerging infectious diseases.

712

**Potential implications**

714 While we live in a period of amazing technological change, biodiversity and ecosystem  
715 health are decreasing worldwide. Portable sequencing will not be a silver bullet for  
716 conservation biology, but it can be a powerful tool to more efficiently obtain information  
717 about the diversity of life on our planet. This is particularly important for many  
718 biodiversity hotpots, such as tropical rainforests like the Ecuadorian Chocó, which are  
719 often under high risk of habitat loss. Here we show that portable DNA barcoding with  
720 the MinION sequencer allows rapid, accurate, and efficient determination at the species  
721 level under remote and tropical environmental conditions. We also demonstrate that  
722 portable sequencing can allow nimble use of rapidly generating data for endangered,  
723 rare, and undescribed species at nearby facilities within the country. As portable  
724 technologies develop further, this method has the potential to broaden the utility of  
725 biological field analyses including real-time species identification, cryptic species  
726 discovery, biodiversity conservation reports, pathogen detection, and environmental  
727 studies.

728

**Competing interests**

730 The authors report no competing interests.

731

**Author contributions**

1  
2  
3  
4  
5  
6  
7  
8  
9  
10  
11  
12  
13  
14  
15  
16  
17  
18  
19  
20  
21  
22  
23  
24  
25  
26  
27  
28  
29  
30  
31  
32  
33  
34  
35  
36  
37  
38  
39  
40  
41  
42  
43  
44  
45  
46  
47  
48  
49  
50  
51  
52  
53  
54  
55  
56  
57  
58  
59  
60  
61  
62  
63  
64  
65

733 AP and SP designed the project. AP, NP, AA, LB, FP, CB, DSV and SP carried out  
734 specimen collection; AP and NP laboratory work; AA, LB, FP, LC, CB and DSV  
735 morphological species identification and SP computational analyses. AP, NP, AA, LB,  
736 FP, LC, CB, DSV and SP wrote the paper.

737

738 **Acknowledgements**

739

740 Fieldwork for this project was made possible with the support of Tropical Herping and  
741 Universidad Tecnológica Indoamérica. For granting access to the Canandé reserve, we  
742 are grateful to Martin Schaefer of Fundación Jocotoco. Funding for equipment and  
743 reagents was supported by the National Geographic Society / Waitt grant (W412-15).  
744 Travel funding for Stefan Prost was provided by the Program of Conservation Genomics  
745 at Stanford University. Laboratory work was carried out at Universidad Tecnológica  
746 Indoamérica in Quito. Research and collection permits were issued by the Ministerio del  
747 Ambiente de Ecuador (MAE-DNB-CM-2015-0017). The Jambato toad tissue was  
748 provided by the Museum of Centro Jambatu under the Ministerio del Ambiente de  
749 Ecuador project “Conservation of Ecuadorian amphibian diversity and sustainable use  
750 of its genetic resources.” We thank Oxford Nanopore Technologies for providing  
751 technical support, making the offline MinKNOW software available, and for providing  
752 two free flow cells. We also thank Hitomi Asahara and the UC Berkeley DNA  
753 Sequencing Facility for lending the benchtop centrifuge used in this study; Jared  
754 Simpson, Sergey Koren and Adam Phillippy for very helpful advice and discussion on  
755 the bioinformatic pipeline, and Ellie E. Armstrong for valuable input on the manuscript.

1  
2  
3  
4  
5  
6  
7  
8  
9  
10  
11  
12  
13  
14  
15  
16  
17  
18  
19  
20  
21  
22  
23  
24  
25  
26  
27  
28  
29  
30  
31  
32  
33  
34  
35  
36  
37  
38  
39  
40  
41  
42  
43  
44  
45  
46  
47  
48  
49  
50  
51  
52  
53  
54  
55  
56  
57  
58  
59  
60  
61  
62  
63  
64  
65

756

## Figures

758

**Figure 1.** Site where field-based nanopore research was conducted within the Chocó biogeographical region in Ecuador, which is one of the world's 25 biodiversity hotspots. This area has experienced one of the highest rates of deforestation in the country and is considered a global conservation priority.

763

**Figure 2.** Process of nanopore sequencing in the Ecuadorian Chocó rainforest. A) Sampling endemic fauna; eyelash pitviper next to MinION. B) Extraction of blood or tissue samples. C) DNA extraction using the DNeasy kit and benchtop centrifuge, and PCR amplification with the MiniPCR. D) Oxford nanopore library preparation of DNA barcodes. E) Bioinformatic processing of nanopore data in the field. F) Primary equipment used in portable sequencing, left to right: MiniPCR sitting atop Poweradd external battery, MinION plugged into a Windows laptop displaying Geneious Pro software of raw nanopore data.

772

**Figure 3.** Species investigated, nucleotide alignments of nanopore and Sanger sequences comparing consensus accuracy, and Maximum Likelihood trees of 16S sequences for: A) Eyelash pitviper, *Bothriechis schlegelii*, B) two species of dwarf gecko, *Lepidoblepharis* sp, and C) the Jambato toad, *Atelopus ignescens*. Red labels in the phylogenetic trees indicate the sequences generated by the MinION.

778

1  
2  
3  
4  
5  
6  
7  
8  
9  
10  
11  
12  
13  
14  
15  
16  
17  
18  
19  
20  
21  
22  
23  
24  
25  
26  
27  
28  
29  
30  
31  
32  
33  
34  
35  
36  
37  
38  
39  
40  
41  
42  
43  
44  
45  
46  
47  
48  
49  
50  
51  
52  
53  
54  
55  
56  
57  
58  
59  
60  
61  
62  
63  
64  
65

779 **Figure 4.** Species investigated, nucleotide alignments of nanopore and Sanger  
780 sequences comparing consensus accuracy, and Maximum Likelihood trees of 16S  
781 sequences for: A) Guayaquil blind snake, *Trilepida guayaquilensis* and B) two species  
782 *Dipsas* snakes. Red labels in the phylogenetic trees indicate the sequences generated  
783 by the MinION.

784

785 **References**

786

- 787 1. Erwin TL. Tropical Forests Their Richness in Coleoptera and Other Arthropod  
788 Species. The Coleop Bull. 1982;36:74-75.
- 789 2. Stork NE. How many species are there? Biodiv Conserv. 1993;2:215-232.
- 790 3. Scheffers BR, Joppa LN, Pimm SL, Laurance WF. What we know and don't know  
791 about Earth's missing biodiversity. Trends Ecol Evol. 2012;27:501-510.
- 792 4. Sierra R, Campos F, Chamberlin J. Assessing biodiversity conservation priorities:  
793 ecosystem risk and representativeness in continental Ecuador. Landscape and  
794 Urban Planning. 2002;59:95-110.
- 795 5. Cuesta F, Peralvo M, Merino-Viteri A, Bustamante M, Baquero F, et al. Priority areas  
796 for biodiversity conservation in mainland Ecuador. Neotrop Biodiv. 2017;3:93-  
797 106.
- 798 6. Gascon C, Brooks TM, Contreras-MacBeath T, Heard N, Konstant W, et al. The  
799 importance and benefits of species. Curr Biol. 2015;25:R431-438.



1  
2  
3  
4  
5  
6  
7  
8  
9  
10  
11  
12  
13  
14  
15  
16  
17  
18  
19  
20  
21  
22  
23  
24  
25  
26  
27  
28  
29  
30  
31  
32  
33  
34  
35  
36  
37  
38  
39  
40  
41  
42  
43  
44  
45  
46  
47  
48  
49  
50  
51  
52  
53  
54  
55  
56  
57  
58  
59  
60  
61  
62  
63  
64  
65

800 7. Pimm SL, Jenkins CN, Abell R, Brooks TM, Gittleman JL, et al. The biodiversity of  
801 species and their rates of extinction, distribution, and protection. *Science*.  
802 2014;344:1246752.

803 8. Ceballos G, Ehrlich PR, Dirzo R. Biological annihilation via the ongoing sixth mass  
804 extinction signaled by vertebrate population losses and declines. *Proc Natl Acad*  
805 *Sci USA*. 2017;114:E6089-E6096.

806 9. Colonma LA, Duellman WE, Almendariz A, Ron, SR. Five new (extinct?) species of  
807 *Atelopus* (Anura: Bufonidae) from Andean Colombia, Ecuador, and Peru.  
808 *Zootaxa*. 2010;2574:1-54.

809 10. Loetters S, Van der Meijden A, Coloma LA, Boistel R, Cloetens P, et al. Assessing  
810 the molecular phylogeny of a near extinct group of vertebrates: the Neotropical  
811 harlequin frogs (Bufonidae; *Atelopus*). *System Biodiv*. 2011;9:45-57.

812 11. Barley AJ, White J, Diesmos AC, Brown RM. The challenge of species delimitation  
813 at the extremes: diversification without morphological change in philippine sun  
814 skinks. *Evolution*. 2013;67:3556-3572.

815 12. Carstens BC, Pelletier TA, Reid NM, Satler JD. How to fail at species delimitation.  
816 *Mol Ecol*. 2013;22:4369-4383.

817 13. Hebert PD, Cywinska A, Ball SL, deWaard JR. Biological identifications through  
818 DNA barcodes. *Proc Biol Sci*. 2003;270:313-321.

819 14. Hebert PD, Gregory TR. The promise of DNA barcoding for taxonomy. *Syst Biol*.  
820 2005;54:852-859.

1  
2  
3  
4  
5  
6  
7  
8  
9  
10  
11  
12  
13  
14  
15  
16  
17  
18  
19  
20  
21  
22  
23  
24  
25  
26  
27  
28  
29  
30  
31  
32  
33  
34  
35  
36  
37  
38  
39  
40  
41  
42  
43  
44  
45  
46  
47  
48  
49  
50  
51  
52  
53  
54  
55  
56  
57  
58  
59  
60  
61  
62  
63  
64  
65

821 15. Savolainen V, Cowan RS, Vogler AP, Roderick GK, Lane R. Towards writing the  
822 encyclopedia of life: an introduction to DNA barcoding. *Philos Trans R Soc Lond*  
823 *B Biol Sci.* 2005;360:1805-1811.

824 16. Gilbert N. Biodiversity law could stymie research. *Nature Publishing Group.* 2010;  
825 <http://www.nature.com/news/2010/100203/full/463598a.html>

826 17. Fernández F. The greatest impediment to the study of biodiversity in Colombia.  
827 *Caldasia.* 2011;33:3-5.

828 18. Laver T, Harrison J, O'Neill PA, Moore K, Farbos A, et al. Assessing the  
829 performance of the Oxford Nanopore Technologies MinION. *Biomol Detect*  
830 *Quantif.* 2015;3:1-8.

831 19. Mikheyev AS, Tin MM. A first look at the Oxford Nanopore MinION sequencer. *Mol*  
832 *Ecol Resour.* 2014;14:1097-1102.

833 20. Quick J, Loman NJ, Duraffour S, Simpson JT, Severi E, et al. Real-time, portable  
834 genome sequencing for Ebola surveillance. *Nature.* 2016;530:228-232.

835 21. Faria NR, Sabino EC, Nunes MR, Alcantara LC, Loman NJ, et al. Mobile real-time  
836 surveillance of Zika virus in Brazil. *Genome Med.* 2016;8:97.

837 22. Faria NR, Quick J, Claro IM, Theze J, de Jesus JG, et al. Establishment and cryptic  
838 transmission of Zika virus in Brazil and the Americas. *Nature.* 2017;546:406-410.

839 23. Edwards A, Debonnaire AR, Sattler B, Mur LAJ, Hodson AJ. Extreme  
840 metagenomics using nanopore DNA sequencing: a field report from Svalbard, 78  
841 °N. *bioRxiv.* 2016; <https://doi.org/10.1101/073965>

1  
2  
3  
4  
5  
6  
7  
8  
9  
10  
11  
12  
13  
14  
15  
16  
17  
18  
19  
20  
21  
22  
23  
24  
25  
26  
27  
28  
29  
30  
31  
32  
33  
34  
35  
36  
37  
38  
39  
40  
41  
42  
43  
44  
45  
46  
47  
48  
49  
50  
51  
52  
53  
54  
55  
56  
57  
58  
59  
60  
61  
62  
63  
64  
65

842 24. Johnson SS, Zaikova E, Goerlitz DS, Bai Y, Tighe SW. Real-Time DNA Sequencing  
843 in the Antarctic Dry Valleys Using the Oxford Nanopore Sequencer. *J Biomol*  
844 *Tech.* 2017;28:2-7.

845 25. Menegon M, Cantaloni C, Rodriguez-Prieto A, Centomo C, Abdelfattah A, Rossato  
846 M, Bernardi M, Xumerle L, Loader S, Delledonne M. On site DNA barcoding by  
847 nanopore sequencing. *PLoS One.*  
848 2017; <https://doi.org/10.1371/journal.pone.0184741>

849 26. Parker J, Helmstetter AJ, Devey D, Wilkinson T, Papadopoulos AST. Field-based  
850 species identification of closely-related plants using real-time nanopore  
851 sequencing. *Sci Rep.* 2017;7:8345.

852 27. Castro-Wallace SL, Chiu CY, John KK, Stahl SE, Rubins KH, et al. Nanopore DNA  
853 Sequencing and Genome Assembly on the International Space Station uploaded  
854 to BioRxiv. 2016; <https://doi.org/10.1101/077651>

855 28. Janzen DH, Hajibabaei M, Burns JM, Hallwachs W, Remigio E, et al. Wedding  
856 biodiversity inventory of a large and complex Lepidoptera fauna with DNA  
857 barcoding. *Philos Trans R Soc Lond B Biol Sci.* 2005;360:1835-1845.

858 29. Myers N, Mittermeier RA, Mittermeier CG, da Fonseca GA, Kent J. Biodiversity  
859 hotspots for conservation priorities. *Nature.* 2000;403:853-858.

860 30. Dinerstein E. A Conservation assessment of the terrestrial ecoregions of Latin  
861 America and the Caribbean. Washington, D.C.: World Bank. 1995;xvii, 129 p. p.

862 31. Olson DM, Dinerstein E. The Global 200: a representation approach to conserving  
863 the Earth's most biologically valuable ecoregions. *Conservation Biology.*  
864 1998;12:502-515.

1  
2  
3  
4  
5  
6  
7  
8  
9  
10  
11  
12  
13  
14  
15  
16  
17  
18  
19  
20  
21  
22  
23  
24  
25  
26  
27  
28  
29  
30  
31  
32  
33  
34  
35  
36  
37  
38  
39  
40  
41  
42  
43  
44  
45  
46  
47  
48  
49  
50  
51  
52  
53  
54  
55  
56  
57  
58  
59  
60  
61  
62  
63  
64  
65

865 32. Santiago Ron LAC, Stefan Lötters, William Duellman, Martín R. Bustamante, Wilmar  
866 Bolívar, Enrique La Marca. 2004 IUCN Red List *Atelopus ignescens*

867 33. Coloma L. El Jambato negro del páramo, *Atelopus ignescens*, resucitó. 2016  
868 IMCiencia.

869 34. Tapia EE, Coloma LA, Pazmiño-Otamendi G, Peñafiel N. Rediscovery of the nearly  
870 extinct longnose harlequin frog *Atelopus longirostris* (Bufonidae) in Junín,  
871 Imbabura, Ecuador. *Neotropical Biodiversity*. 2017;3:157-167.

872 35. Kiesecker JM. Global stressors and the global decline of amphibians: tipping the  
873 stress immunocompetency axis. *Ecological research*. 2011;26:897-908.

874 36. Pounds JA, Coloma LA. Beware the lone killer. *Nature Reports Climate Change*.  
875 2008;57-59.

876 37. Lips KR, Diffendorfer J, Mendelson III JR, Sears MW. Riding the wave: reconciling  
877 the roles of disease and climate change in amphibian declines. *PLoS biology*.  
878 2008;6: e72.

879 38. Elias M, Hill RI, Willmott KR, Dasmahapatra KK, Brower AV, et al. Limited  
880 performance of DNA barcoding in a diverse community of tropical butterflies.  
881 *Proc Biol Sci*. 2007;274:2881-2889.

882 39. Meyer CP, Paulay G. DNA barcoding: error rates based on comprehensive  
883 sampling. *PLoS Biol*. 2005;3: e422.

884 40. Bik HM. Let's rise up to unite taxonomy and technology. *PLoS Biology*. 2017;15:  
885 e2002231.

1  
2  
3  
4  
5  
6  
7  
8  
9  
10  
11  
12  
13  
14  
15  
16  
17  
18  
19  
20  
21  
22  
23  
24  
25  
26  
27  
28  
29  
30  
31  
32  
33  
34  
35  
36  
37  
38  
39  
40  
41  
42  
43  
44  
45  
46  
47  
48  
49  
50  
51  
52  
53  
54  
55  
56  
57  
58  
59  
60  
61  
62  
63  
64  
65

886 41. Koren S, Walenz BP, Berlin K, Miller JR, Bergman NH, et al. Canu: scalable and  
887 accurate long-read assembly via adaptive k-mer weighting and repeat  
888 separation. *Genome Res.* 2017;27:722-736.

889 42. Loman NJ, Quick J, Simpson JT. A complete bacterial genome assembled de novo  
890 using only nanopore sequencing data. *Nat Methods.* 2015;12:733-735.

891 43. Wick RR, Judd LM, Gorrie CL, Holt KE (2017) Completing bacterial genome  
892 assemblies with multiplex MinION sequencing. *bioRxiv.* 2017;160614.

893 44. Nguyen SH, Duarte TDS, Coin LJ, Cao MD. Real-Time Demultiplexing Nanopore  
894 Barcoded Sequencing Data With npBarcode. *bioRxiv.* 2017;134155.

895 45. Glenn TC. Field guide to next-generation DNA sequencers. *Molecular ecology*  
896 *resources.* 2011;11: 759-769.

897 46. Meier R, Wong W, Srivathsan A, Foo M. \$1 DNA barcodes for reconstructing  
898 complex phenomes and finding rare species in specimen-rich samples. *Cladistics*  
899 2016;32(1):100-10.

900 47. Liu S, Yang C, Zhou C, Zhou X. Filling reference gaps via assembling DNA  
901 barcodes using high-throughput sequencing - moving toward barcoding the world.  
902 *GigaScience,* 2017; 1-8.

903 48. Hebert PDN, Brakmann TWA, Prosser SWJ, Ratnasingham S, deWaard JR,  
904 Ivanova NV, Janzen DH, Hallwachs W, Naik S, Sones JE, Zakharov EV. A Sequel to  
905 Sanger: Amplicon Sequencing That Scales. *bioRxiv,* doi: <https://doi.org/10.1101/191619>

906 49. Zeng, Y., & Martin, CH. Oxford Nanopore sequencing in a research-based  
907 undergraduate course. *bioRxiv* 2017;227439.

1  
2  
3  
4  
5  
6  
7  
8  
9  
10  
11  
12  
13  
14  
15  
16  
17  
18  
19  
20  
21  
22  
23  
24  
25  
26  
27  
28  
29  
30  
31  
32  
33  
34  
35  
36  
37  
38  
39  
40  
41  
42  
43  
44  
45  
46  
47  
48  
49  
50  
51  
52  
53  
54  
55  
56  
57  
58  
59  
60  
61  
62  
63  
64  
65

909

50. Canier L, Khim N, Kim S, Sluydts V, Heng S, et al. An innovative tool for moving malaria PCR detection of parasite reservoir into the field. *Malar J.* 2013;12:405.

51. Marx V. PCR heads into the field. *Nature methods.* 2015;12:393-397.

52. Guevara EE, Frankel DC, Ranaivonasy J, Richard AF, Ratsirarson J, et al. A simple, economical protocol for DNA extraction and amplification where there is no lab. *Conservation Genetics Resources.* 2017;1-7.

53. Centeno-Cuadros A, Abbasi I, Nathan R. Sex determination in the wild: a field application of loop-mediated isothermal amplification successfully determines sex across three raptor species. *Mol Ecol Resour.* 2017;17:153-160.

54. Howson ELA, Armson B, Madi M, Kasanga CJ, Kandusi S, et al. Evaluation of Two Lyophilized Molecular Assays to Rapidly Detect Foot-and-Mouth Disease Virus Directly from Clinical Samples in Field Settings. *Transbound Emerg Dis.* 2017;64:861-871.

55. Bhamla MS, Benson B, Chai C, Katsikis G, Johri A, et al. Hand-powered ultralow-cost paper centrifuge. *Nature Biomedical Engineering.* 2017;1: 0009.

56. Chandler J, Camberis M, Bouchery T, Blaxter M, Le Gros G, et al. Annotated mitochondrial genome with Nanopore R9 signal for *Nippostrongylus brasiliensis*. *F1000Res.* 2017;6: 56.

57. Rees HC, Maddison BC, Middleditch DJ, Patmore JR, Gough KC. The detection of aquatic animal species using environmental DNA—a review of eDNA as a survey tool in ecology. *Journal of Applied Ecology.* 2014;51:1450-1459.

1  
2  
3  
4  
5  
6  
7  
8  
9  
10  
11  
12  
13  
14  
15  
16  
17  
18  
19  
20  
21  
22  
23  
24  
25  
26  
27  
28  
29  
30  
31  
32  
33  
34  
35  
36  
37  
38  
39  
40  
41  
42  
43  
44  
45  
46  
47  
48  
49  
50  
51  
52  
53  
54  
55  
56  
57  
58  
59  
60  
61  
62  
63  
64  
65

931 58. Ayub M, Hardwick SW, Luisi BF, Bayley H. Nanopore-based identification of  
932 individual nucleotides for direct RNA sequencing. *Nano Lett.* 2014;13: 6144-  
933 6150.

934 59. Garalde DR, Snell EA, Jachimowicz D, Heron AJ, Bruce M, et al. Highly parallel  
935 direct RNA sequencing on an array of nanopores bioRxiv.  
936 2016;<https://doi.org/10.1101/068809>

937 60. Hargreaves AD, Mulley JF. Assessing the utility of the Oxford Nanopore MinION for  
938 snake venom gland cDNA sequencing. *PeerJ.* 2015;3:e1441.

939 61. Weldon C, du Preez LH, Hyatt AD, Muller R, Spears R. Origin of the amphibian  
940 chytrid fungus. *Emerg Infect Dis.* 2004;10:2100-2105.

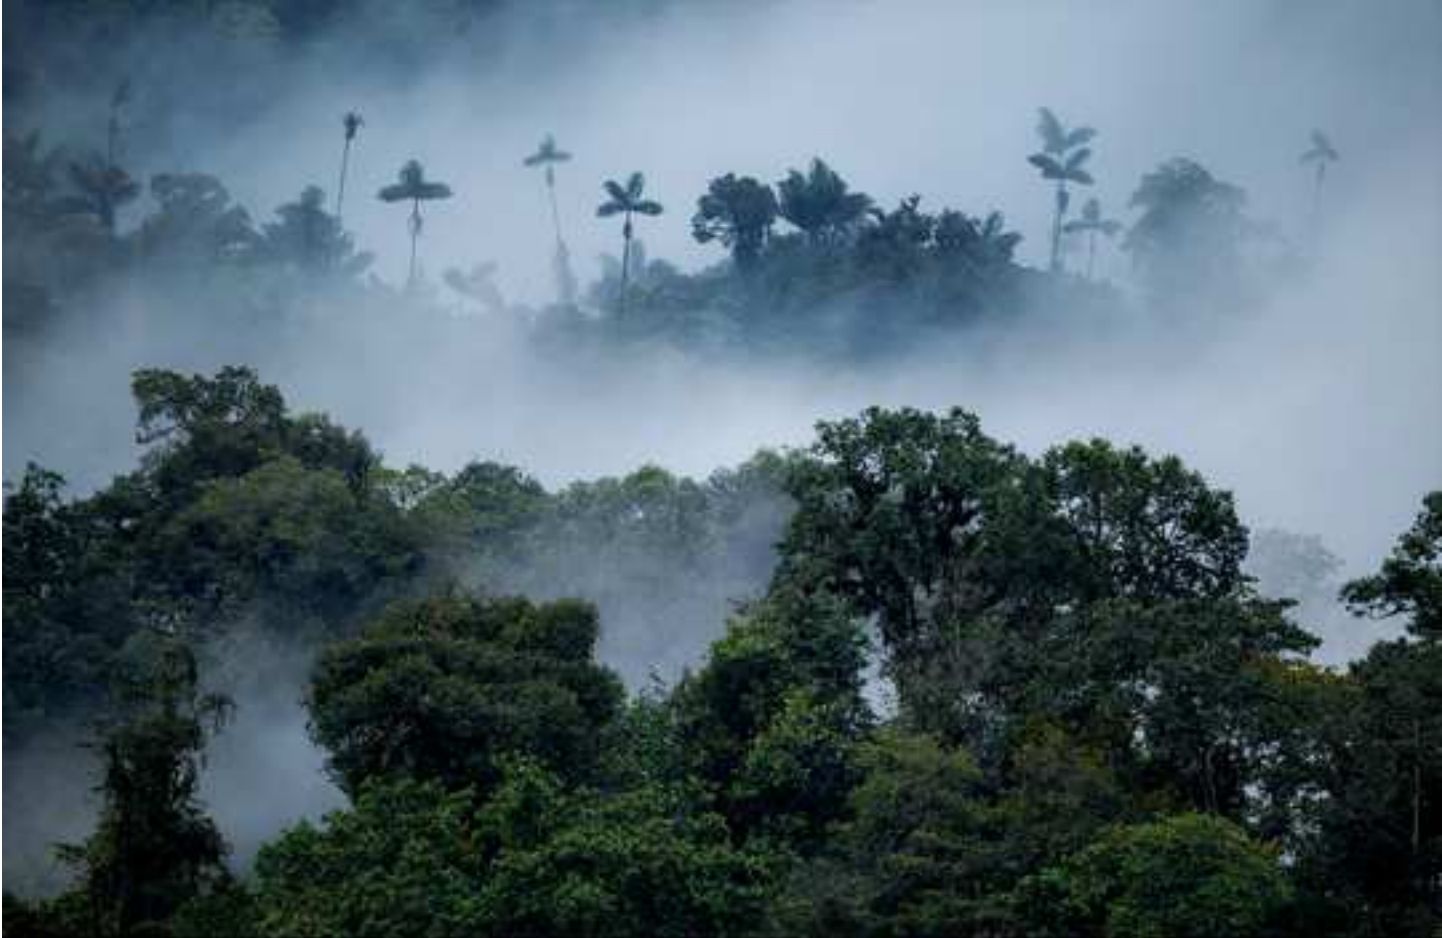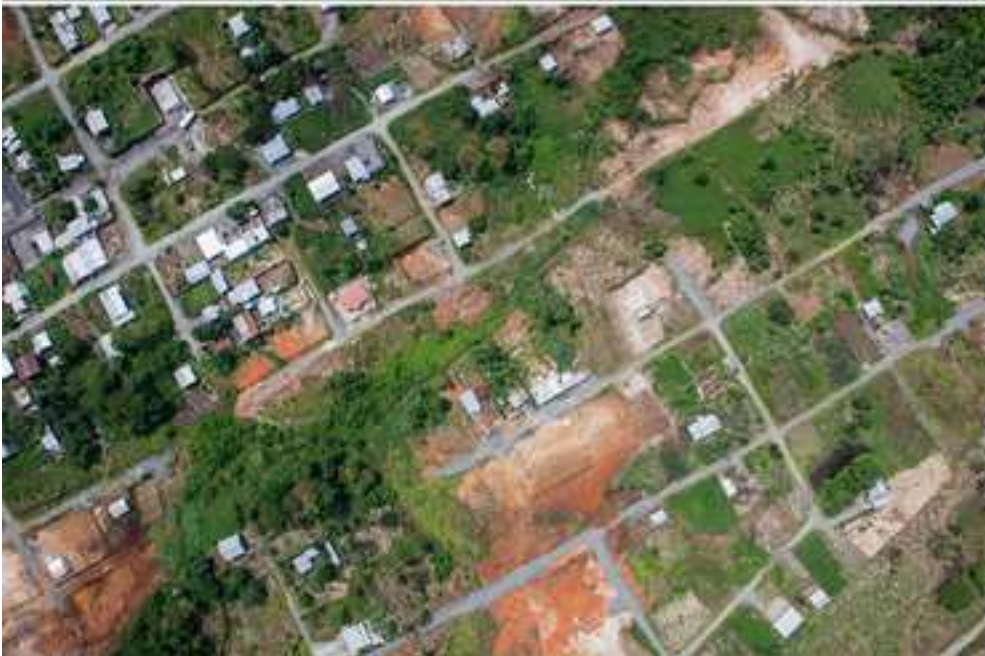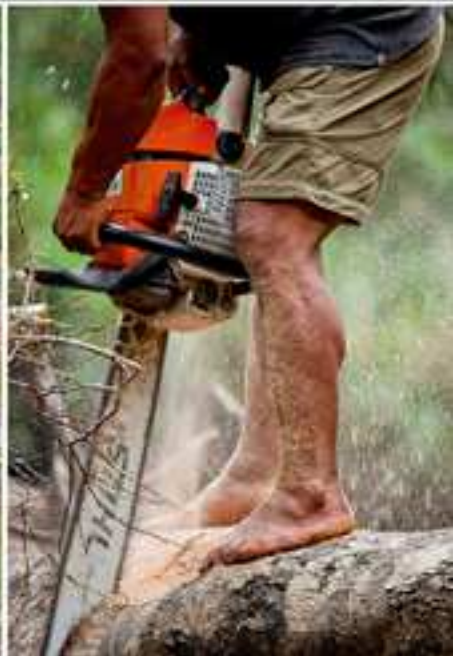



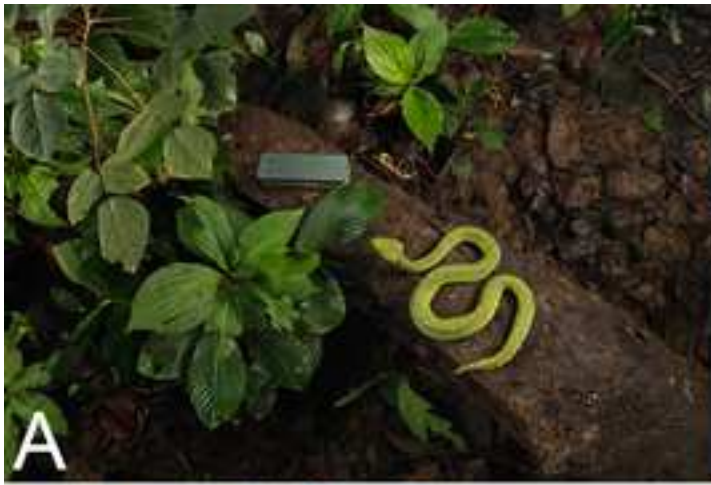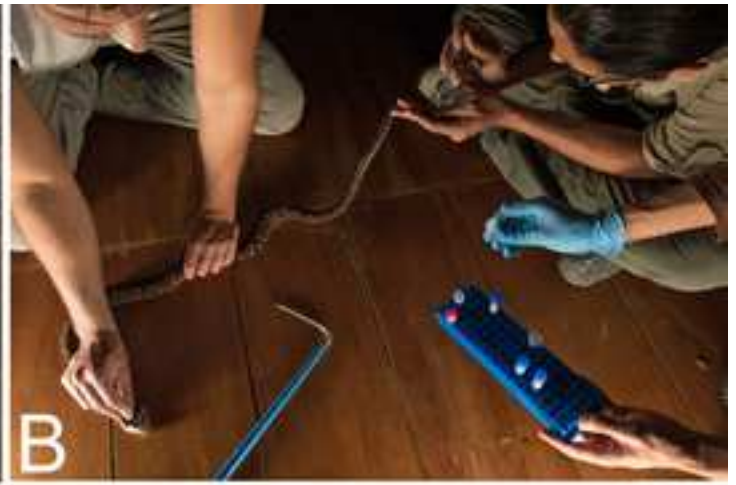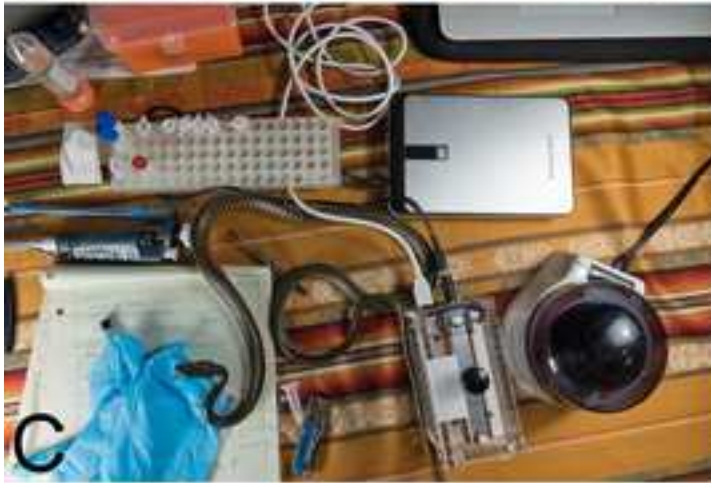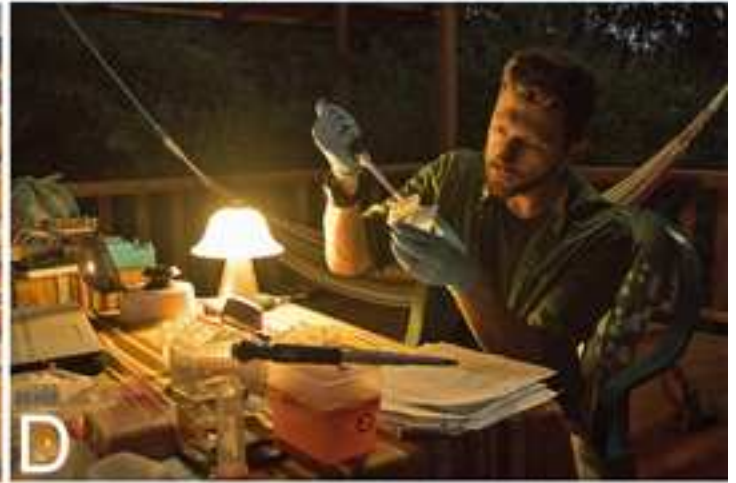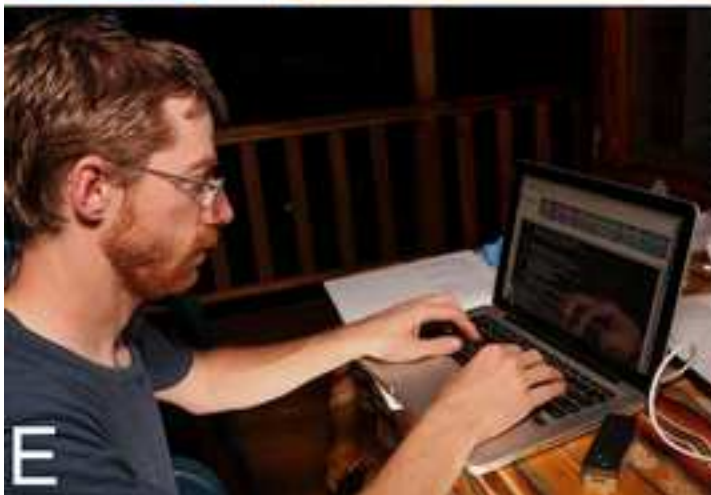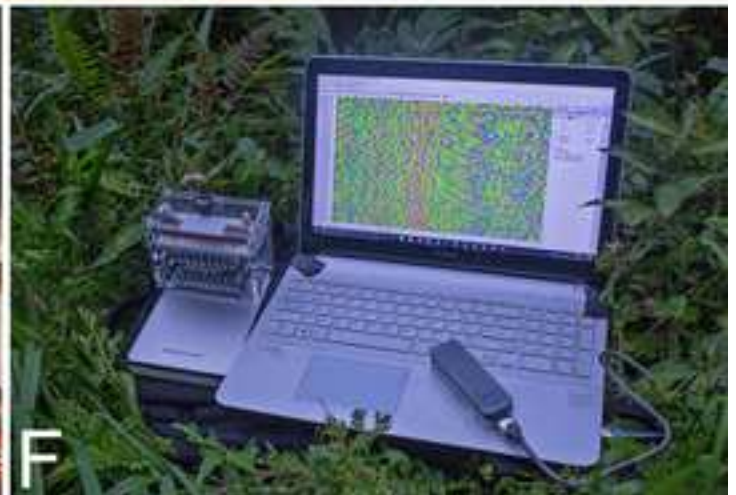

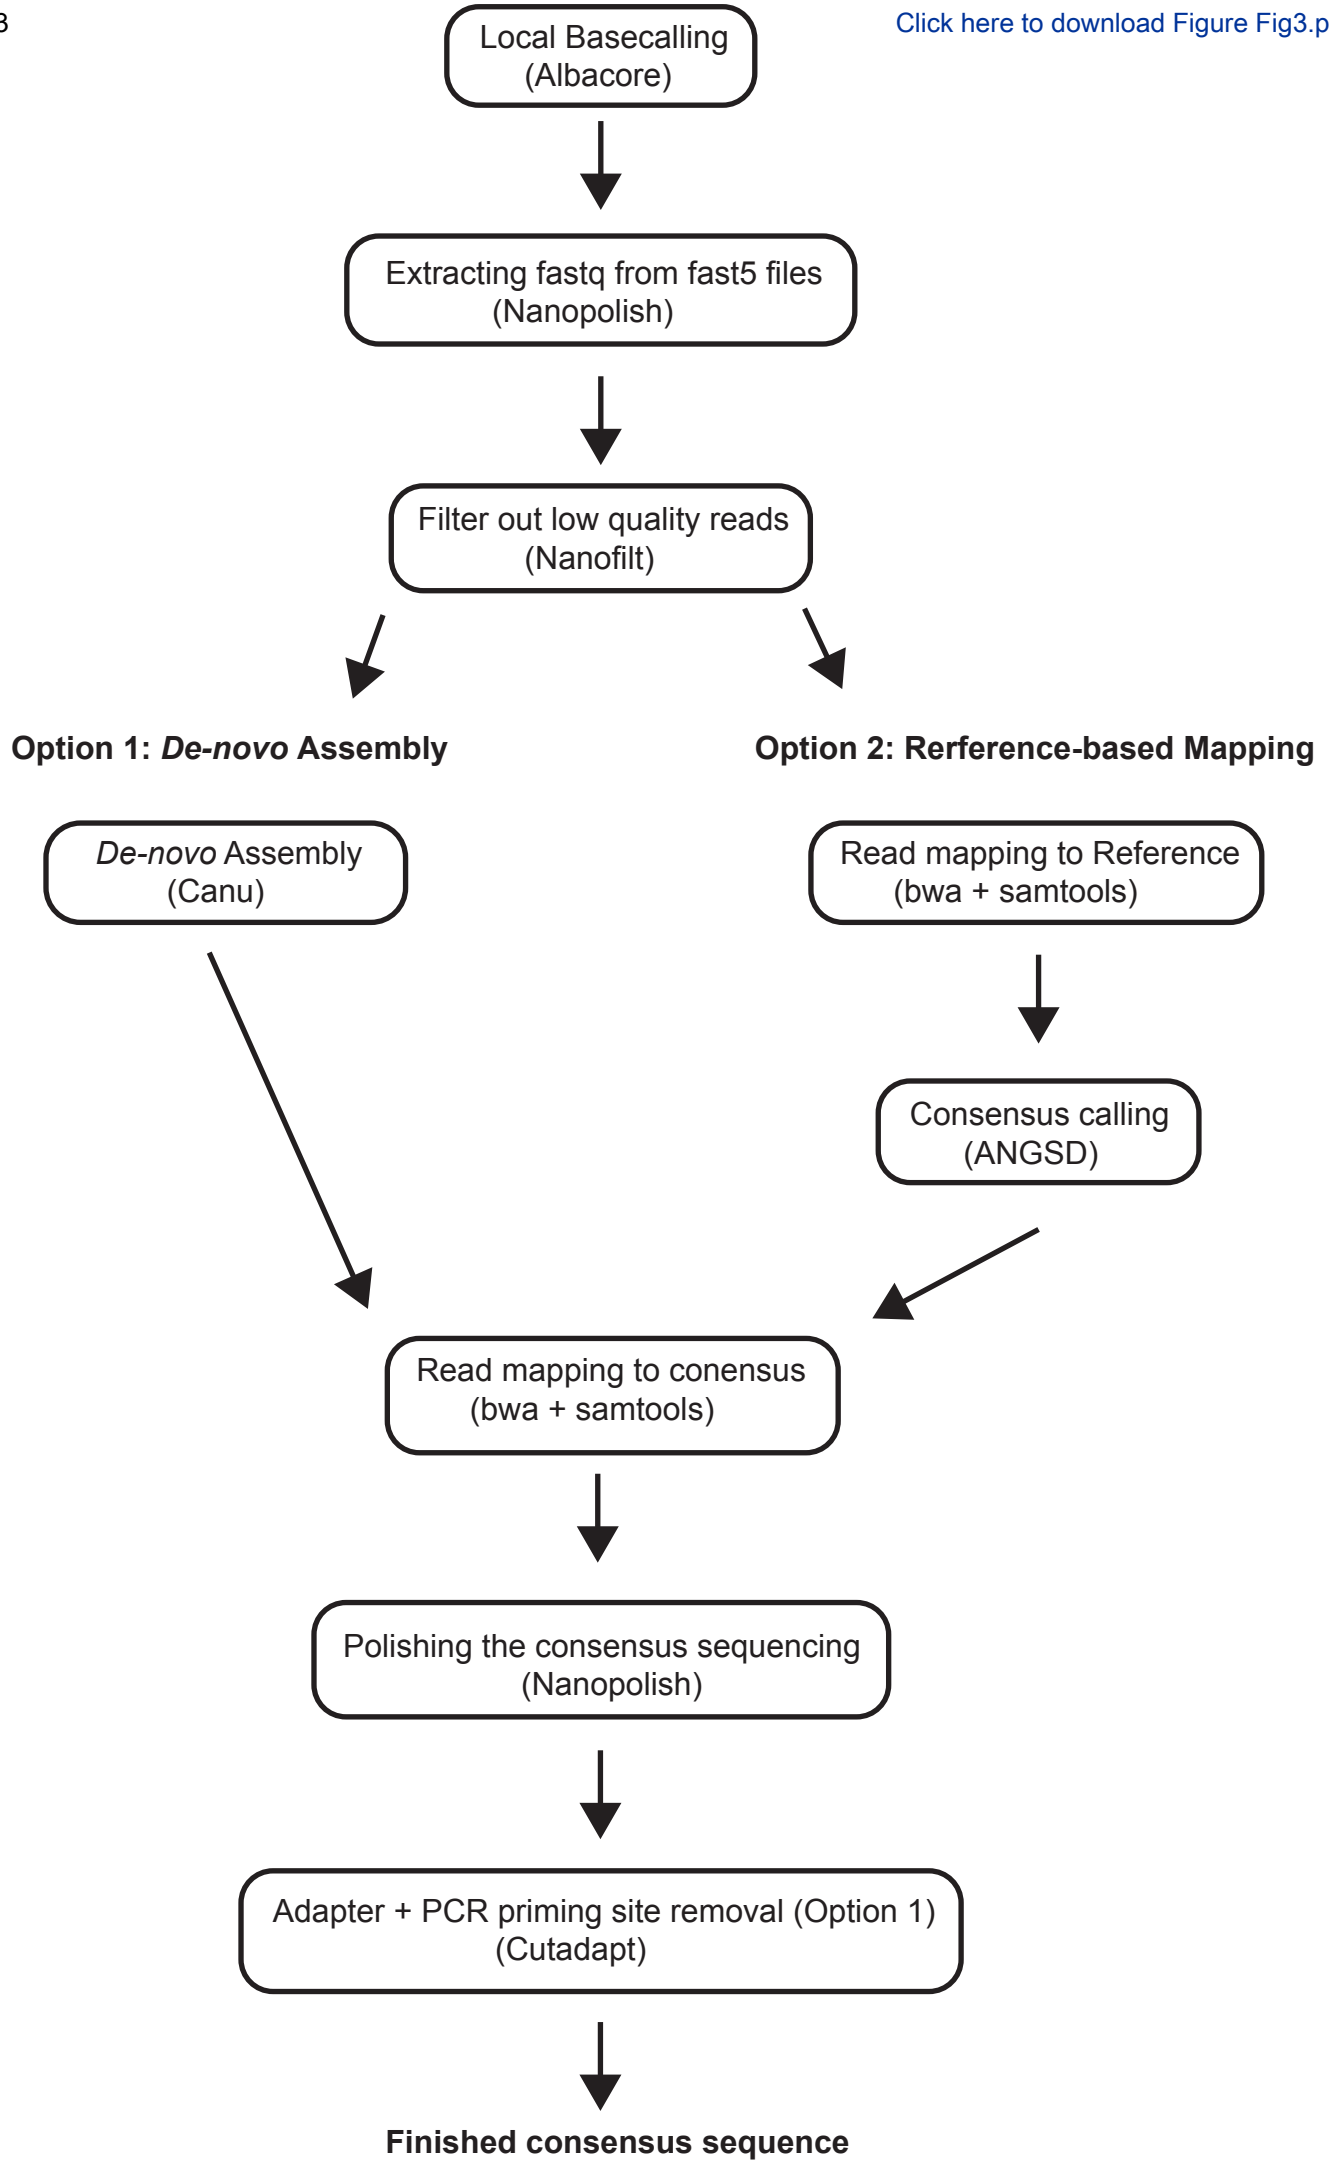

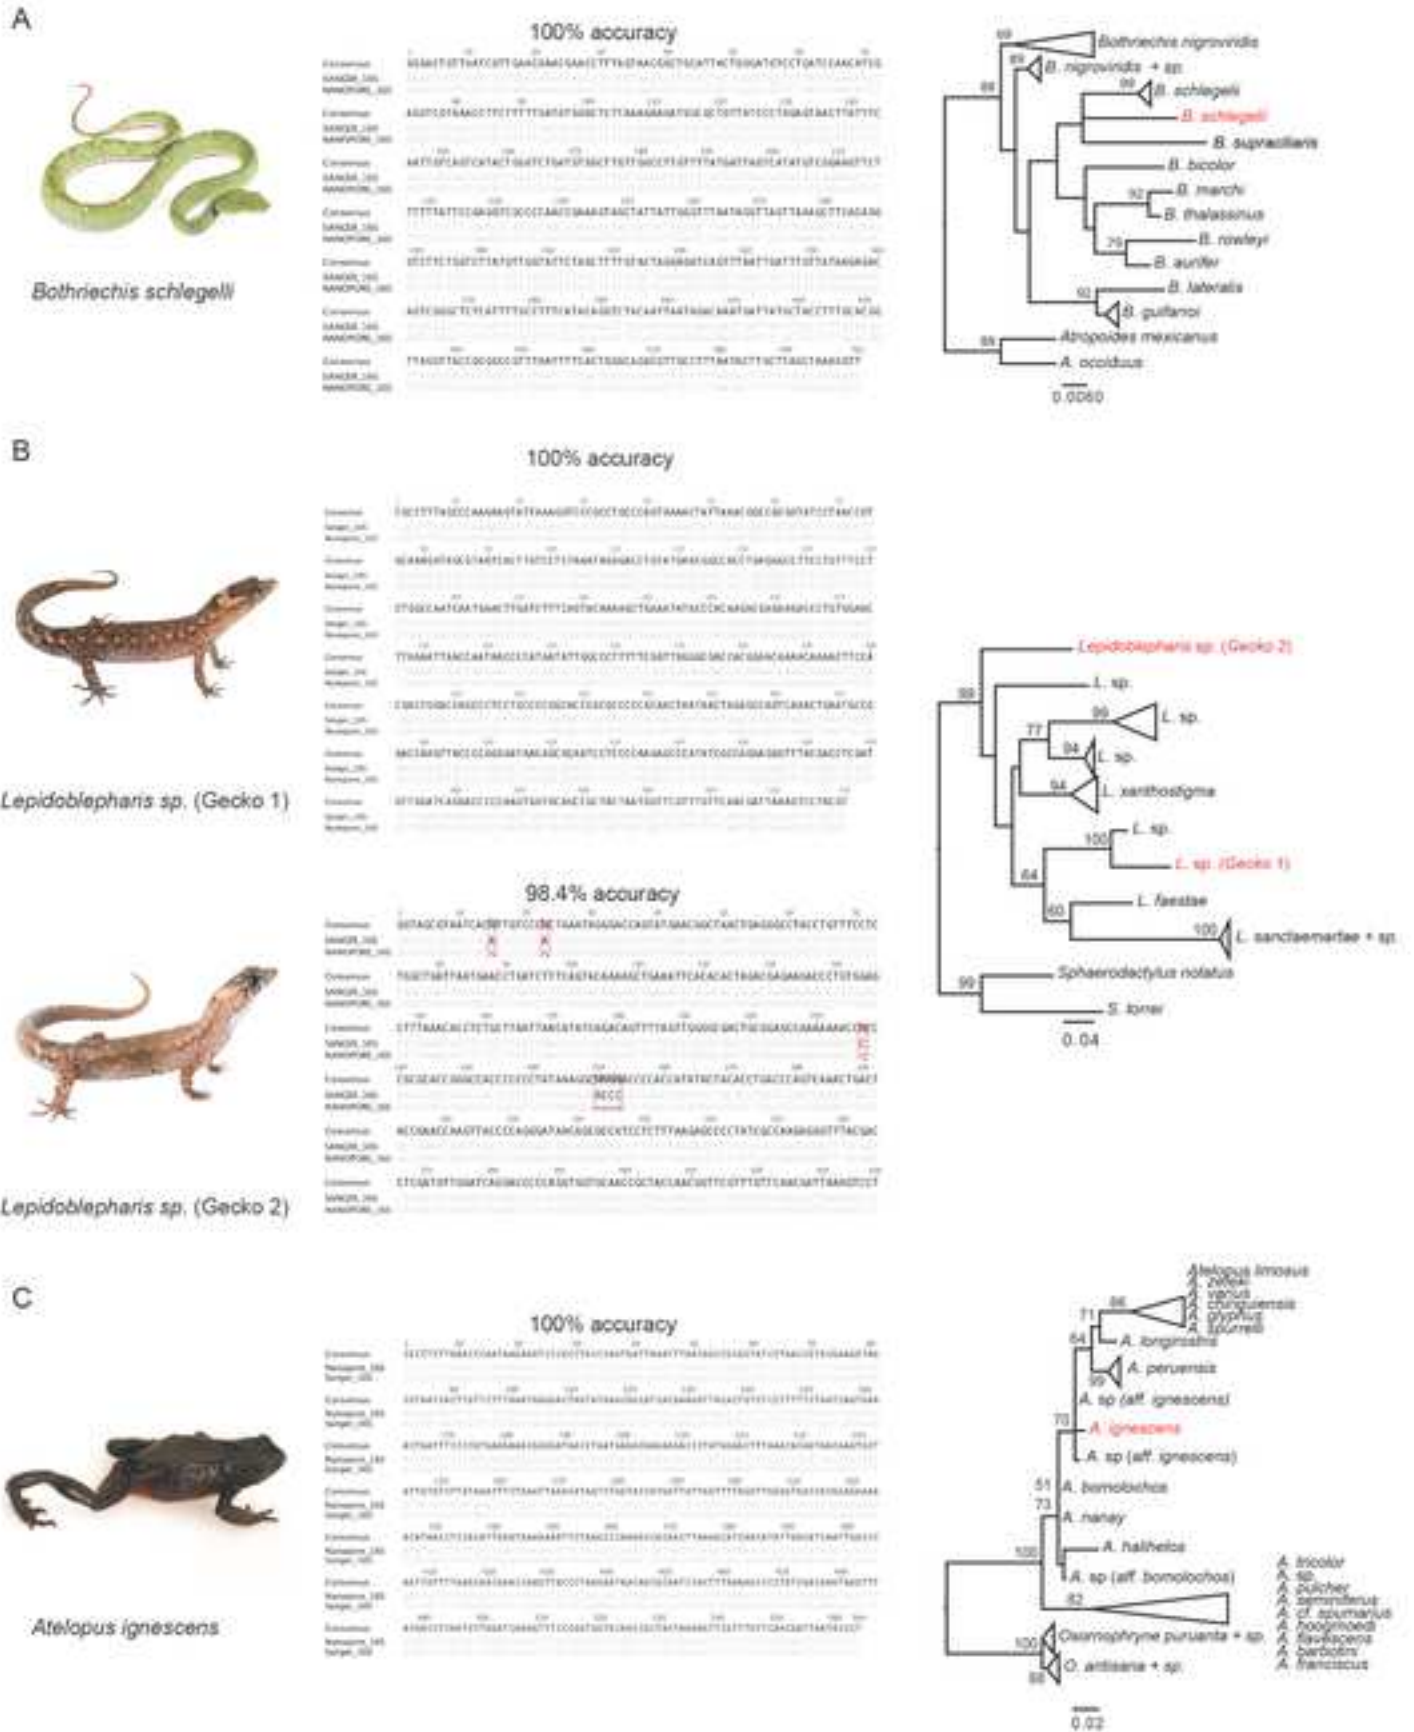



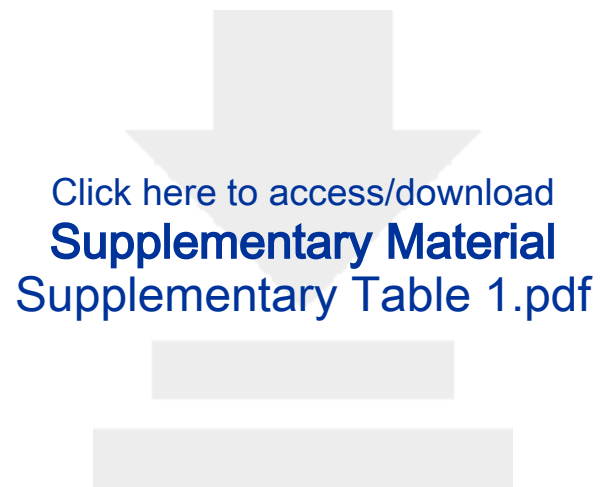

Click here to access/download  
**Supplementary Material**  
Supplementary Table 1.pdf

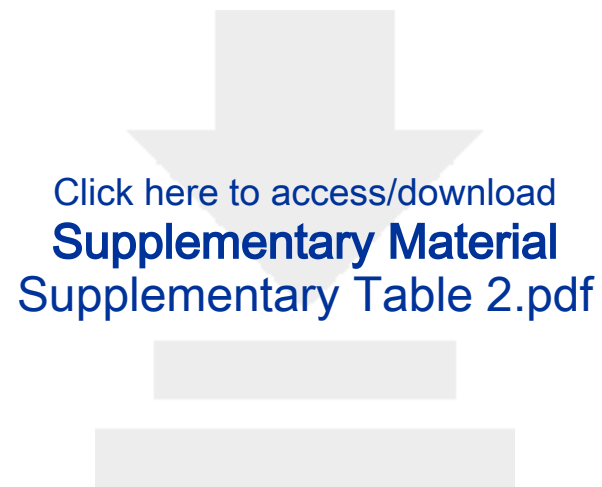

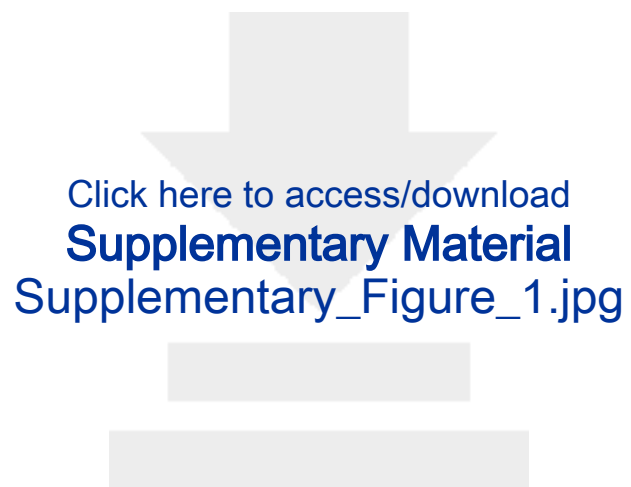

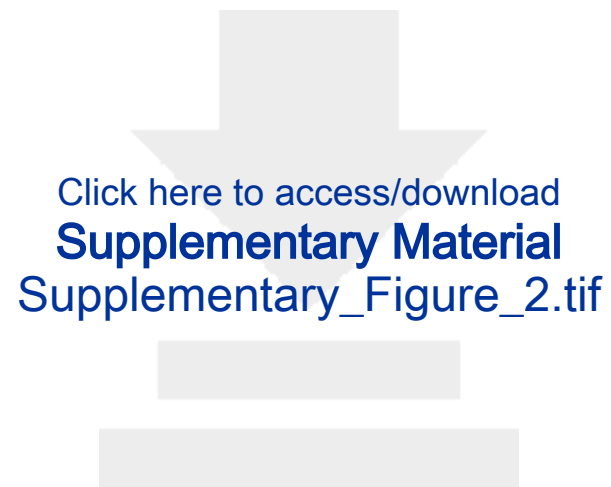



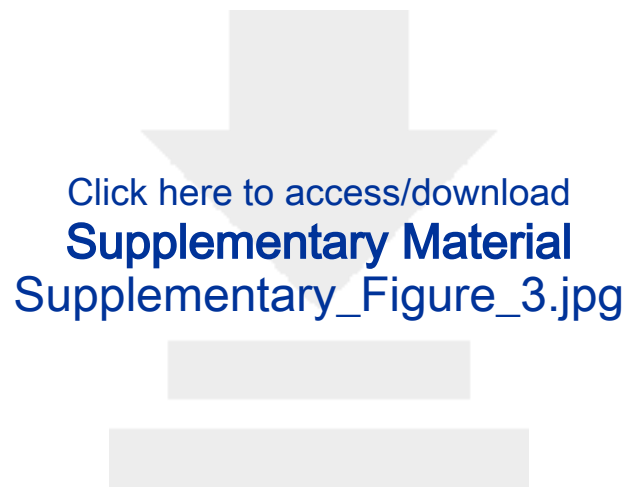

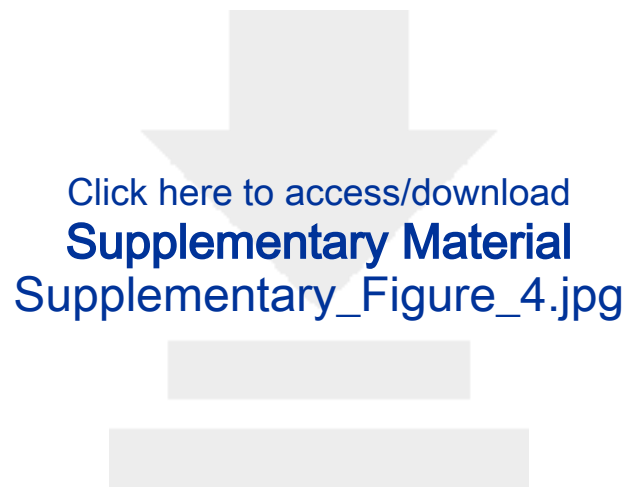

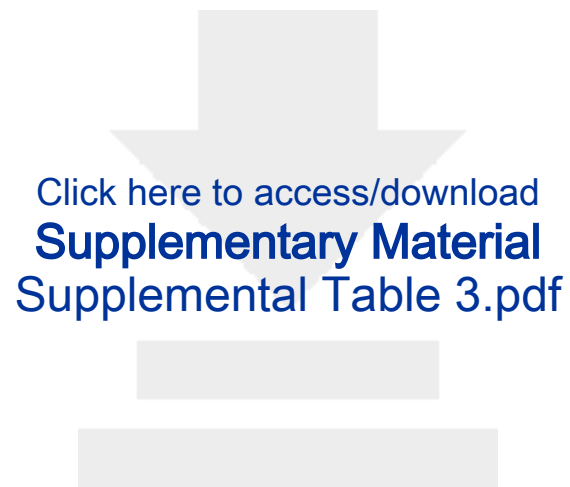

Click here to access/download  
**Supplementary Material**  
Supplemental Table 3.pdf

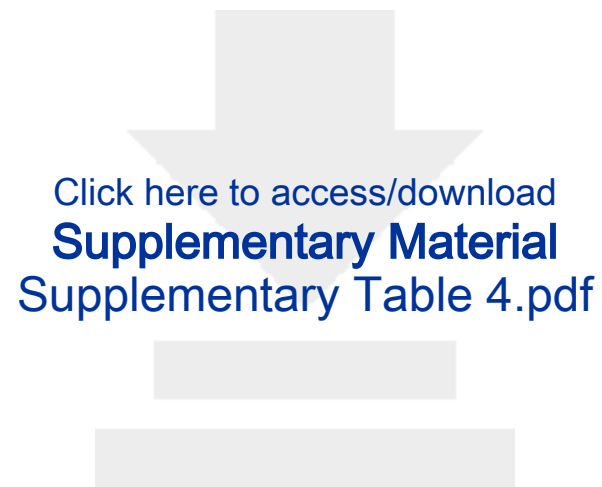

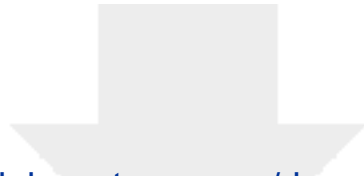

[Click here to access/download](#)

**Supplementary Material**

**SUPPLEMENTARY INFORMATION GigaScience.docx**

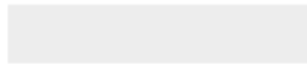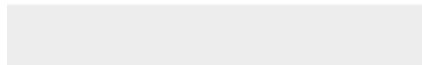

Supplement: giy033_giga-d-17-00345_revision_1.pdf [file giy033_giga-d-17-00345_revision_1.pdf]
