# Supplementary material for: Real-time DNA barcoding in a rainforest using nanopore sequencing: opportunities for rapid biodiversity assessments and local capacity building
Source: PubMed Central journal article supplement (PMC5905381; doi:10.1093/gigascience/giy033), 2018-04-02

# GigaScience

## Real-time DNA barcoding in a rainforest using nanopore sequencing: opportunities for rapid biodiversity assessments and local capacity building

--Manuscript Draft--

|                                                      |                                                                                                                                                                                                                                                                                                                                                                                                                                                                                                                                                                                                                                                                                                                                                                                                                                                                                                                                                                                                                                                                                                                                                                                                                                                                                                                                                                                                                                                                                                                                                                                                                                                                                                                                                                                                                                                                                                                                                                                                                                                                                                                    |                    |
|------------------------------------------------------|--------------------------------------------------------------------------------------------------------------------------------------------------------------------------------------------------------------------------------------------------------------------------------------------------------------------------------------------------------------------------------------------------------------------------------------------------------------------------------------------------------------------------------------------------------------------------------------------------------------------------------------------------------------------------------------------------------------------------------------------------------------------------------------------------------------------------------------------------------------------------------------------------------------------------------------------------------------------------------------------------------------------------------------------------------------------------------------------------------------------------------------------------------------------------------------------------------------------------------------------------------------------------------------------------------------------------------------------------------------------------------------------------------------------------------------------------------------------------------------------------------------------------------------------------------------------------------------------------------------------------------------------------------------------------------------------------------------------------------------------------------------------------------------------------------------------------------------------------------------------------------------------------------------------------------------------------------------------------------------------------------------------------------------------------------------------------------------------------------------------|--------------------|
| <b>Manuscript Number:</b>                            | GIGA-D-17-00345R2                                                                                                                                                                                                                                                                                                                                                                                                                                                                                                                                                                                                                                                                                                                                                                                                                                                                                                                                                                                                                                                                                                                                                                                                                                                                                                                                                                                                                                                                                                                                                                                                                                                                                                                                                                                                                                                                                                                                                                                                                                                                                                  |                    |
| <b>Full Title:</b>                                   | Real-time DNA barcoding in a rainforest using nanopore sequencing: opportunities for rapid biodiversity assessments and local capacity building                                                                                                                                                                                                                                                                                                                                                                                                                                                                                                                                                                                                                                                                                                                                                                                                                                                                                                                                                                                                                                                                                                                                                                                                                                                                                                                                                                                                                                                                                                                                                                                                                                                                                                                                                                                                                                                                                                                                                                    |                    |
| <b>Article Type:</b>                                 | Research                                                                                                                                                                                                                                                                                                                                                                                                                                                                                                                                                                                                                                                                                                                                                                                                                                                                                                                                                                                                                                                                                                                                                                                                                                                                                                                                                                                                                                                                                                                                                                                                                                                                                                                                                                                                                                                                                                                                                                                                                                                                                                           |                    |
| <b>Funding Information:</b>                          | National Geographic Society (W412-15)                                                                                                                                                                                                                                                                                                                                                                                                                                                                                                                                                                                                                                                                                                                                                                                                                                                                                                                                                                                                                                                                                                                                                                                                                                                                                                                                                                                                                                                                                                                                                                                                                                                                                                                                                                                                                                                                                                                                                                                                                                                                              | Mr Aaron Pomerantz |
| <b>Abstract:</b>                                     | <p><b>Background</b><br/>Advancements in portable scientific instruments provide promising avenues to expedite field work in order to understand the diverse array of organisms that inhabit our planet. Here, we tested the feasibility for in situ molecular analyses of endemic fauna using a portable laboratory fitting within a single backpack, in one of the world's most imperiled biodiversity hotspots: the Ecuadorian Chocó rainforest. We utilized portable equipment, including the MinION nanopore sequencer (Oxford Nanopore Technologies) and the miniPCR (miniPCR), to perform DNA extraction, PCR amplification and real-time DNA barcoding of reptile specimens in the field.</p> <p><b>Findings</b><br/>We demonstrate that nanopore sequencing can be implemented in a remote tropical forest to quickly and accurately identify species using DNA barcoding, as we generated consensus sequences for species resolution with an accuracy of &gt;99% in less than 24 hours after collecting specimens. The flexibility of our mobile laboratory further allowed us to generate sequence information at Universidad Tecnológica Indoamérica in Quito for rare, endangered, and undescribed species. This includes the recently re-discovered Jambato toad, which was thought to be extinct for 28 years. Sequences generated on the MinION required as little as 30 reads to achieve high accuracy relative to Sanger sequencing and with further multiplexing of samples, nanopore sequencing can become a cost-effective approach for rapid and portable DNA barcoding.</p> <p><b>Conclusions</b><br/>Overall, we establish how mobile laboratories and nanopore sequencing can help to accelerate species identification in remote areas to aid in conservation efforts and be applied to research facilities in developing countries. This opens up possibilities for biodiversity research by promoting local research capacity building, teaching laymen and students about the environment, tackling wildlife crime or by promoting conservation via research focused eco-tourism.</p> |                    |
| <b>Corresponding Author:</b>                         | Aaron Pomerantz<br>University of California Berkeley<br>UNITED STATES                                                                                                                                                                                                                                                                                                                                                                                                                                                                                                                                                                                                                                                                                                                                                                                                                                                                                                                                                                                                                                                                                                                                                                                                                                                                                                                                                                                                                                                                                                                                                                                                                                                                                                                                                                                                                                                                                                                                                                                                                                              |                    |
| <b>Corresponding Author Secondary Information:</b>   |                                                                                                                                                                                                                                                                                                                                                                                                                                                                                                                                                                                                                                                                                                                                                                                                                                                                                                                                                                                                                                                                                                                                                                                                                                                                                                                                                                                                                                                                                                                                                                                                                                                                                                                                                                                                                                                                                                                                                                                                                                                                                                                    |                    |
| <b>Corresponding Author's Institution:</b>           | University of California Berkeley                                                                                                                                                                                                                                                                                                                                                                                                                                                                                                                                                                                                                                                                                                                                                                                                                                                                                                                                                                                                                                                                                                                                                                                                                                                                                                                                                                                                                                                                                                                                                                                                                                                                                                                                                                                                                                                                                                                                                                                                                                                                                  |                    |
| <b>Corresponding Author's Secondary Institution:</b> |                                                                                                                                                                                                                                                                                                                                                                                                                                                                                                                                                                                                                                                                                                                                                                                                                                                                                                                                                                                                                                                                                                                                                                                                                                                                                                                                                                                                                                                                                                                                                                                                                                                                                                                                                                                                                                                                                                                                                                                                                                                                                                                    |                    |
| <b>First Author:</b>                                 | Aaron Pomerantz                                                                                                                                                                                                                                                                                                                                                                                                                                                                                                                                                                                                                                                                                                                                                                                                                                                                                                                                                                                                                                                                                                                                                                                                                                                                                                                                                                                                                                                                                                                                                                                                                                                                                                                                                                                                                                                                                                                                                                                                                                                                                                    |                    |
| <b>First Author Secondary Information:</b>           |                                                                                                                                                                                                                                                                                                                                                                                                                                                                                                                                                                                                                                                                                                                                                                                                                                                                                                                                                                                                                                                                                                                                                                                                                                                                                                                                                                                                                                                                                                                                                                                                                                                                                                                                                                                                                                                                                                                                                                                                                                                                                                                    |                    |
| <b>Order of Authors:</b>                             | Aaron Pomerantz<br>Nicolás Peñafiel<br>Alejandro Arteaga                                                                                                                                                                                                                                                                                                                                                                                                                                                                                                                                                                                                                                                                                                                                                                                                                                                                                                                                                                                                                                                                                                                                                                                                                                                                                                                                                                                                                                                                                                                                                                                                                                                                                                                                                                                                                                                                                                                                                                                                                                                           |                    |

|                                                                                                                                                                                                                                                                                                                                                                                                                                                                                                                               |                                                                                              |
|-------------------------------------------------------------------------------------------------------------------------------------------------------------------------------------------------------------------------------------------------------------------------------------------------------------------------------------------------------------------------------------------------------------------------------------------------------------------------------------------------------------------------------|----------------------------------------------------------------------------------------------|
|                                                                                                                                                                                                                                                                                                                                                                                                                                                                                                                               | Lucas Bustamante                                                                             |
|                                                                                                                                                                                                                                                                                                                                                                                                                                                                                                                               | Frank Pichardo                                                                               |
|                                                                                                                                                                                                                                                                                                                                                                                                                                                                                                                               | Luis A Coloma                                                                                |
|                                                                                                                                                                                                                                                                                                                                                                                                                                                                                                                               | César Barrio-Amorós                                                                          |
|                                                                                                                                                                                                                                                                                                                                                                                                                                                                                                                               | David Salazar-Valenzuela                                                                     |
|                                                                                                                                                                                                                                                                                                                                                                                                                                                                                                                               | Stefan Prost                                                                                 |
| <b>Order of Authors Secondary Information:</b>                                                                                                                                                                                                                                                                                                                                                                                                                                                                                |                                                                                              |
| <b>Response to Reviewers:</b>                                                                                                                                                                                                                                                                                                                                                                                                                                                                                                 | As per reviewer #2's suggestion, we have removed Figure 1 and adjusted the text accordingly. |
| <b>Additional Information:</b>                                                                                                                                                                                                                                                                                                                                                                                                                                                                                                |                                                                                              |
| <b>Question</b>                                                                                                                                                                                                                                                                                                                                                                                                                                                                                                               | <b>Response</b>                                                                              |
| Are you submitting this manuscript to a special series or article collection?                                                                                                                                                                                                                                                                                                                                                                                                                                                 | No                                                                                           |
| <b>Experimental design and statistics</b><br><br>Full details of the experimental design and statistical methods used should be given in the Methods section, as detailed in our <a href="#">Minimum Standards Reporting Checklist</a> . Information essential to interpreting the data presented should be made available in the figure legends.<br><br>Have you included all the information requested in your manuscript?                                                                                                  | Yes                                                                                          |
| <b>Resources</b><br><br>A description of all resources used, including antibodies, cell lines, animals and software tools, with enough information to allow them to be uniquely identified, should be included in the Methods section. Authors are strongly encouraged to cite <a href="#">Research Resource Identifiers</a> (RRIDs) for antibodies, model organisms and tools, where possible.<br><br>Have you included the information requested as detailed in our <a href="#">Minimum Standards Reporting Checklist</a> ? | Yes                                                                                          |
| <b>Availability of data and materials</b><br><br>All datasets and code on which the conclusions of the paper rely must be either included in your submission or deposited in <a href="#">publicly available repositories</a> (where available and ethically                                                                                                                                                                                                                                                                   | Yes                                                                                          |

appropriate), referencing such data using a unique identifier in the references and in the “Availability of Data and Materials” section of your manuscript.

Have you have met the above requirement as detailed in our [Minimum Standards Reporting Checklist?](#)

1  
2  
3  
4  
5  
6  
7  
8  
9  
10  
11  
12  
13  
14  
15  
16  
17  
18  
19  
20  
21  
22  
23  
24  
25  
26  
27  
28  
29  
30  
31  
32  
33  
34  
35  
36  
37  
38  
39  
40  
41  
42  
43  
44  
45  
46  
47  
48  
49  
50  
51  
52  
53  
54  
55  
56  
57  
58  
59  
60  
61  
62  
63  
64  
65

1 **Real-time DNA barcoding in a rainforest using nanopore sequencing:**  
2 **opportunities for rapid biodiversity assessments and local capacity building**

3  
4 **Aaron Pomerantz<sup>1,\*</sup>, Nicolás Peñafiel<sup>2</sup>, Alejandro Arteaga<sup>3-5</sup>, Lucas Bustamante<sup>5</sup>,**  
5 **Frank Pichardo<sup>5</sup>, Luis A. Coloma<sup>6</sup>, César L. Barrio-Amorós<sup>7</sup>, David Salazar-**  
6 **Valenzuela<sup>2</sup>, Stefan Prost<sup>1,8,\*</sup>**

7  
8 <sup>1</sup> Department of Integrative Biology, University of California, Berkeley, CA, USA

9 <sup>2</sup> Centro de Investigación de la Biodiversidad y Cambio Climático (BioCamb) e  
10 Ingeniería en Biodiversidad y Recursos Genéticos, Facultad de Ciencias de Medio  
11 Ambiente, Universidad Tecnológica Indoamérica, Machala y Sabanilla, Quito, Ecuador

12 <sup>3</sup> *Richard Gilder Graduate School, American Museum of Natural History, New York,*  
13 *USA*

14 <sup>4</sup> *Department of Herpetology, American Museum of Natural History, New York, USA*

15 <sup>5</sup> Tropical Herping, Quito, Ecuador

16 <sup>6</sup> Centro Jambatu de Investigación y Conservación de Anfibios, Fundación Otonga,  
17 Quito, Ecuador

18 <sup>7</sup> Doc Frog Expeditions, Uvita, Costa Rica

19 <sup>8</sup> Program for Conservation Genomics, Department of Biology, Stanford University,  
20 Stanford, CA, USA

21 \* Corresponding authors: [Pomerantz\\_aaron@berkeley.edu](mailto:Pomerantz_aaron@berkeley.edu) (A. Pomerantz), ORCID:  
22 0000-0002-6412-9001; and [stprost@stanford.edu](mailto:stprost@stanford.edu) (S. Prost)

23

1  
2  
3  
4 24 Aaron Pomerantz: [pomerantz\\_aaron@berkeley.edu](mailto:pomerantz_aaron@berkeley.edu); Nicolás Peñafiel:  
5  
6 25 [nicolaspennafielloaiza@gmail.com](mailto:nicolaspennafielloaiza@gmail.com); Alejandro Arteaga: [aarteaga@amnh.org](mailto:aarteaga@amnh.org); Lucas  
7  
8  
9 26 Bustamante: [lucmat21@gmail.com](mailto:lucmat21@gmail.com); Frank Pichardo: [frankpichardo@gmail.com](mailto:frankpichardo@gmail.com); Luis A.  
10  
11 27 Coloma: [coloma.l@gmail.com](mailto:coloma.l@gmail.com); César L. Barrio-Amorós: [cesarlba@yahoo.com](mailto:cesarlba@yahoo.com); David  
12  
13  
14 28 Salazar-Valenzuela: [davidsalazarv@gmail.com](mailto:davidsalazarv@gmail.com); Stefan Prost:  
15  
16 29 [stefan.prost@berkeley.edu](mailto:stefan.prost@berkeley.edu)  
17  
18

## 19 30 **Abstract**

20  
21 31

## 22 32 **Background**

23  
24 33 Advancements in portable scientific instruments provide promising avenues to expedite  
25  
26 34 field work in order to understand the diverse array of organisms that inhabit our  
27  
28 35 planet. Here, we tested the feasibility for *in situ* molecular analyses of endemic fauna  
29  
30 36 using a portable laboratory fitting within a single backpack, in one of the world's most  
31  
32 37 imperiled biodiversity hotspots: the Ecuadorian Chocó rainforest. We utilized portable  
33  
34 38 equipment, including the MinION nanopore sequencer (Oxford Nanopore Technologies)  
35  
36 39 and the miniPCR (miniPCR), to perform DNA extraction, PCR amplification and real-  
37  
38 40 time DNA barcoding of reptile specimens in the field.  
39  
40  
41  
42  
43  
44  
45  
46  
47

## 48 42 **Findings**

49  
50 43 We demonstrate that nanopore sequencing can be implemented in a remote tropical  
51  
52 44 forest to quickly and accurately identify species using DNA barcoding, as we generated  
53  
54 45 consensus sequences for species resolution with an accuracy of >99% in less than 24  
55  
56 46 hours after collecting specimens. The flexibility of our mobile laboratory further allowed  
57  
58  
59  
60  
61  
62  
63  
64  
65

1  
2  
3  
4  
5  
6  
7  
8  
9  
10  
11  
12  
13  
14  
15  
16  
17  
18  
19  
20  
21  
22  
23  
24  
25  
26  
27  
28  
29  
30  
31  
32  
33  
34  
35  
36  
37  
38  
39  
40  
41  
42  
43  
44  
45  
46  
47  
48  
49  
50  
51  
52  
53  
54  
55  
56  
57  
58  
59  
60  
61  
62  
63  
64  
65

us to generate sequence information at Universidad Tecnológica Indoamérica in Quito for rare, endangered, and undescribed species. This includes the recently re-discovered Jambato toad, which was thought to be extinct for 28 years. Sequences generated on the MinION required as little as 30 reads to achieve high accuracy relative to Sanger sequencing and with further multiplexing of samples, nanopore sequencing can become a cost-effective approach for rapid and portable DNA barcoding.

**Conclusions**

Overall, we establish how mobile laboratories and nanopore sequencing can help to accelerate species identification in remote areas to aid in conservation efforts and be applied to research facilities in developing countries. This opens up possibilities for biodiversity research by promoting local research capacity building, teaching laymen and students about the environment, tackling wildlife crime or by promoting conservation via research focused eco-tourism.

**Keywords**

Nanopore sequencing, portable, DNA barcoding, biodiversity, field-based, real-time

**Data Description**

**Background**

Biodiversity is defined as the variety of life found on Earth, including variation in genes, species, and ecosystems. While about 1.9 million species have been described to date,

1  
2  
3  
4 70 there are an estimated 5-30 million species in total on the planet, with most of the  
5  
6  
7 71 diversity contained within tropical rainforests [1], [2], [3]. For instance, Ecuador, despite  
8  
9 72 its small size of 283,561 km<sup>2</sup> (roughly 1.5% of South America), is one of the most  
10  
11 73 biologically diverse countries in the world [4], [5]. Biodiversity is fundamentally important  
12  
13  
14 74 to natural and agro-ecosystems; it provides humans with an array of foods and  
15  
16 75 materials, contributes to medical discoveries, furnishes the economy, and supports  
17  
18  
19 76 ecological services that make life on our planet possible [6]. Today species are going  
20  
21 77 extinct at an accelerated rate because of environmental changes caused by human  
22  
23  
24 78 activities including habitat loss, spread of non-native species, pollution, and climate  
25  
26 79 change [7], [8]. All of these threats have put a serious strain on the diversity of species  
27  
28  
29 80 on Earth.

30  
31 81 In the past decade, an ever-growing body of readily accessible knowledge, coupled  
32  
33  
34 82 with new tools in molecular genetics and bioinformatics, have resulted in species being  
35  
36 83 described with greater accuracy, in greater detail, and with additional information to  
37  
38  
39 84 morphological differences. As a result of this increase in quality and content, desirable  
40  
41 85 as it is, the actual process of species description has become slower, while the rate at  
42  
43 86 which species are being lost to extinction has become faster. For many groups of  
44  
45  
46 87 animals, species delimitation can be challenging using solely morphological  
47  
48 88 characteristics [9], [10], and can be improved by incorporating molecular data [11], [12].  
49  
50  
51 89 This is relevant for the conservation of threatened animals because programs or laws  
52  
53 90 can be implemented more effectively when the existence of a species or population is  
54  
55  
56 91 formally described. DNA barcoding, which is a diagnostic technique that utilizes short  
57  
58 92 conserved DNA sequences, has become a popular tool for a variety of studies including  
59  
60  
61  
62  
63  
64  
65

1  
2  
3  
4 93 species identification and molecular phylogenetic inference [13], [14], [15]. Ongoing  
5  
6 94 initiatives, such as 'Barcode of Life' ([www.barcodeoflife.org](http://www.barcodeoflife.org)), seek to identify species  
7  
8  
9 95 and create large-scale reference databases via diagnostic DNA sequences using a  
10  
11 96 standardized approach to accelerate taxonomic progress.

12  
13  
14 97 While projects utilizing standard molecular markers have grown in popularity in  
15  
16 98 the last decade, a fundamental challenge remains in transporting biological material to a  
17  
18  
19 99 site that can carry out the DNA sequencing. Furthermore, complex and overwhelming  
20  
21 100 regulations can impede biological research in biodiverse countries, and can make it  
22  
23 101 challenging to export material out of the country of origin [16], [17]. Additionally, many  
24  
25  
26 102 research institutions in developing parts of the world do not have access to conventional  
27  
28  
29 103 sequencing technologies within the country, further limiting identification options. This is  
30  
31 104 the case for Ecuador, where most laboratories ship their samples internationally to be  
32  
33 105 sequenced, often creating a delay of weeks to months between tissue collection and the  
34  
35  
36 106 availability of the sequence data. Performing genetic analyses on site or at a nearby  
37  
38 107 facility within the country can help to avoid project delays and decrease the risk of  
39  
40  
41 108 sample quality decline associated with extensive transport. Now it has become possible  
42  
43 109 to take portable lab equipment to remote regions, perform *in situ* experiments, and  
44  
45  
46 110 obtain genetic information relevant for biological studies and conservation policies in  
47  
48 111 real-time.

## 112 113 **Portable Sequencing**

114 The MinION (Oxford Nanopore Technologies) is a recently developed nanopore-based  
115 DNA sequencing platform. This technology has several advantages over traditional



1  
2  
3  
4  
5  
6  
7  
8  
9  
10  
11  
12  
13  
14  
15  
16  
17  
18  
19  
20  
21  
22  
23  
24  
25  
26  
27  
28  
29  
30  
31  
32  
33  
34  
35  
36  
37  
38  
39  
40  
41  
42  
43  
44  
45  
46  
47  
48  
49  
50  
51  
52  
53  
54  
55  
56  
57  
58  
59  
60  
61  
62  
63  
64  
65

116 sequencing technologies, including long-read output, low initial startup costs relative to  
117 other commercial sequencers, portability, and rapid real-time analysis (reviewed by [18],  
118 [19]). Due to its small size (10 x 3.2 x 2 cm), light weight (90 grams) and ease of power  
119 and data transfer (a single USB connection to a standard laptop computer), the MinION  
120 has emerged as a valuable tool for portable sequencing projects. This device has been  
121 applied in remote sites outside of conventional labs including West Africa to monitor the  
122 2014-2015 Ebola outbreak [20] and Brazil for Zika virus outbreak surveillance [21], [22].  
123 It has also been applied in the Antarctic to sequence microbial communities [23], [24], in  
124 Tanzania to sequence frog DNA [25], and in Snowdonia National Park, Wales, for  
125 shotgun genomic sequencing of closely-related plant species [26]. The MinION has  
126 even been run aboard the International Space Station to evaluate performance off-Earth  
127 [27]. Indeed, nanopore sequencing appears to hold promise for a variety of molecular  
128 experiments in the field.

129           Scientists have mused over the possibility of a portable method for DNA

130 barcoding for over a decade [28], [15] and in this study our goal was to determine if the  
131 steps involved in barcoding, including real-time sequencing with the MinION, could be  
132 carried out entirely during a field expedition. We specifically targeted DNA barcodes  
133 with existing reference databases because they are the standard approach in molecular  
134 biodiversity studies, and allowed us to rapidly produce genetic data for the identification  
135 of several animal taxa by multiplexing. Our field site was situated in a remote tropical  
136 rainforest and did not offer the commodities of a sophisticated laboratory environment,  
137 including consistent power sources or internet access. We assessed the feasibility for *in*  
138 *situ* genetic sequencing of reptiles and amphibians for rapid species identification, using

1  
2  
3  
4  
5  
6  
7  
8  
9  
10  
11  
12  
13  
14  
15  
16  
17  
18  
19  
20  
21  
22  
23  
24  
25  
26  
27  
28  
29  
30  
31  
32  
33  
34  
35  
36  
37  
38  
39  
40  
41  
42  
43  
44  
45  
46  
47  
48  
49  
50  
51  
52  
53  
54  
55  
56  
57  
58  
59  
60  
61  
62  
63  
64  
65

139 a portable laboratory fitting within a single backpack, at one of the world's most  
140 imperiled biodiversity hotspots, the Ecuadorian Chocó rainforest. We demonstrate that  
141 portable DNA amplicon sequencing with the MinION allows rapid, accurate, and efficient  
142 determination at the species level under remote tropical environmental conditions, as  
143 well as quick turnaround time for DNA barcodes of undescribed and threatened species  
144 at a research facility within the country.

146 **Analyses**

148 **Site, sampling, digital photos, tissue collection**

149 We performed all field-based research in the Canandé Reserve (0.52993 N, 79.03541  
150 W, 594 m), a 2000 ha. protected area, owned by the Jocotoco Foundation  
151 (<http://www.fjocotoco.org/canandeacute1.html>) in Esmeraldas province, northwestern  
152 Ecuador. The reserve is located in the Chocó ecoregion and is approximately 6 hours  
153 by car, depending on road conditions, from the city of Quito. The majority of organisms  
154 sampled in this study were located by space-constrained visual examination of ground-  
155 level substrates [1]. The remaining individuals were detected by turning over logs,  
156 rocks, and other surface objects. All specimens included in the genetic analyses were  
157 morphologically identified based on [2] and [3]. The sample (a tadpole, CJ 7191) of  
158 *Atelopus ignescens* was provided by the Museum of Centro Jambatu, Ecuador and was  
159 preserved in ethanol 95%. We took vouchers for all samples collected and processed in  
160 the field. These were deposited at the Museo de Zoología of the Universidad  
161 Tecnológica Indoamérica (MZUTI 5375 *Bothriechis schlegelii*, MZUTI 5383

1  
2  
3  
4  
5  
6  
7  
8  
9  
10  
11  
12  
13  
14  
15  
16  
17  
18  
19  
20  
21  
22  
23  
24  
25  
26  
27  
28  
29  
30  
31  
32  
33  
34  
35  
36  
37  
38  
39  
40  
41  
42  
43  
44  
45  
46  
47  
48  
49  
50  
51  
52  
53  
54  
55  
56  
57  
58  
59  
60  
61  
62  
63  
64  
65

162 *Lepidoblepharis* aff. *grandis*. (Gecko 1), MZUTI 5384 *Lepidoblepharis* aff. *buchwaldi*.  
163 (Gecko 2)).

164

**Portable laboratory equipment and set-up**

The main items for portable laboratory equipment included the following: two MinION devices, a USB 3.0 cable, three SpotON flow cells (R9.5, Oxford Nanopore Technologies (ONT)), one miniPCR thermocycler (miniPCR), and a benchtop centrifuge (USA Scientific), as well as standard laboratory pipettes and sample racks (Fig. 1, Supplementary Figure 3). The MinKNOW offline software (ONT) required for operation of the MinION was installed and ran on a Windows Vaio Sony laptop with an external SSD drive (VisionTek, 240GB). All heat block and temperature cycling steps were performed using the miniPCR machine, which is a portable thermo-cycler weighing 0.45 kg. The miniPCR was programmed via an application on the laptop and powered by an external battery (PowerAdd). The total amount of equipment could fit in one carry-on backpack; a full list of laboratory hardware is provided as Supplementary Table 1. Reagents for sequencing required frozen transport from the US, which was attained by use of packaging with cold packs in a Styrofoam box and was later transferred to a plastic cool box with further cold packs upon arrival to Quito, Ecuador. MinION flow cells require storage at +2-8°C and were therefore transferred in a food storage container with chilled cold packs. At the field site, reagents and supplies were stored inside a local refrigerator and freezer.

183

**Molecular techniques**

1  
2  
3  
4  
5  
6  
7  
8  
9  
10  
11  
12  
13  
14  
15  
16  
17  
18  
19  
20  
21  
22  
23  
24  
25  
26  
27  
28  
29  
30  
31  
32  
33  
34  
35  
36  
37  
38  
39  
40  
41  
42  
43  
44  
45  
46  
47  
48  
49  
50  
51  
52  
53  
54  
55  
56  
57  
58  
59  
60  
61  
62  
63  
64  
65

185 Genomic DNA was extracted from fresh blood or tissue samples stored in 95% ethanol  
186 using either the DNeasy Blood & Tissue Kit (Qiagen, Hilden, Germany) according to  
187 manufacturer's protocol and eluted in 100 µl ddH<sub>2</sub>O or a modified salt precipitation  
188 method based on the Puregene DNA purification kit (Gentra Systems) that involved  
189 cellular lysis with SDS and proteinase K, protein precipitation using guanidine  
190 isothiocyanate, and DNA precipitation by isopropanol. Tools for manipulating and lysing  
191 tissues were sterilized with a flame in between processing samples. We amplified the  
192 following mitochondrial DNA fragments: 16S gene using primers 16Sar-L and 16Sbr-H-  
193 R from [4], CytB gene using primers L14910 and H16064 developed by [5], and the  
194 gene coding for subunit 4 of the NADH dehydrogenase with primers ND4 developed by  
195 [6]. All PCR primers contained universal tailed sequences for the Oxford Nanopore  
196 Technologies barcoding kit (Supplementary Table 2). We used the ONT PCR Barcoding  
197 Kit that allows up to 12 different libraries (barcodes 1-12) to be combined and loaded  
198 onto a single flow cell at the same time. PCR reactions contained approximately 1 µl of  
199 PCR product, 2.5 µl 10X PCR buffer, 1 µl 25mM MgCl<sub>2</sub>, 200 µM dNTP mix, 0.2 µM of  
200 each primer and 0.25 Platinum Taq DNA Polymerase (Thermo Fisher Scientific) in a 25  
201 µL total volume. All samples for the first PCR run were amplified on the same miniPCR  
202 under the following settings: initial denaturation: 94°C for 2 minutes, 35 cycles of  
203 denaturation at 94°C for 45 seconds, annealing at 56°C for 60 seconds extension for  
204 72°C for 60 seconds, and a final extension of 72°C for 120 seconds. Then a second  
205 round of PCR was carried out, including 2 µl of ONT PCR Barcode, 2 µL of first-round  
206 PCR product, 41 µl H<sub>2</sub>O, and 50 µl PCR reaction mix (0.5 µl Taq DNA polymerase, 1 µL  
207 dNTP mix, 2 µL MgCl<sub>2</sub>, 41 µL H<sub>2</sub>O). The second round of PCR barcode conditions

1  
2  
3  
4  
5  
6  
7  
8  
9  
10  
11  
12  
13  
14  
15  
16  
17  
18  
19  
20  
21  
22  
23  
24  
25  
26  
27  
28  
29  
30  
31  
32  
33  
34  
35  
36  
37  
38  
39  
40  
41  
42  
43  
44  
45  
46  
47  
48  
49  
50  
51  
52  
53  
54  
55  
56  
57  
58  
59  
60  
61  
62  
63  
64  
65

208 were modified based on ONT protocol for the Platinum Taq polymerase used in this  
209 study as follows: initial denaturation at 95°C for 3 minutes, 15 cycles of denaturation at  
210 95°C for 15 seconds, annealing at 62°C for 15 seconds, extension at 72°C for 60  
211 seconds, and final extension at 72°C for 120 seconds. For verification of samples  
212 sequenced in the field, PCR products were subsequently cleaned with Exonuclease I and  
213 Alkaline Phosphatase (Illustra ExoProStar by GE Healthcare) at the Universidad  
214 Tecnológica Indoamérica (UTI) in Quito and sent to Macrogen Inc (Korea) for Sanger  
215 sequencing. All PCR products were sequenced on an ABI3730XL sequencer in both  
216 forward and reverse directions with the same primers that were used for amplification.

217

218 **MinION sequencing**

219 DNA library preparation was carried out according to the 1D PCR barcoding amplicons  
220 SQK-LSK108 protocol (Oxford Nanopore Technologies). Barcode DNA products were  
221 pooled with 5 µl of DNA CS (a positive control provided by ONT) and an end-repair was  
222 performed (NEB-Next Ultra II End-prep reaction buffer and enzyme mix, New England  
223 Biolabs), then purified using AMPure XP beads. Adapter ligation and tethering was then  
224 carried out with 20 µl Adapter Mix (ONT) and 50 µl of NEB Blunt/TA ligation Master Mix  
225 (New England Biolabs). The adapter ligated DNA library was then purified with AMPure  
226 beads, followed by the addition of Adapter Bead binding buffer (ONT), and finally eluted  
227 in 15 µl of Elution Buffer (ONT). Each R9 flow cell was primed with 1000 µl of a mixture  
228 of Fuel Mix (Oxford Nanopore Technologies) and nuclease-free water. Twelve  
229 microliters of the amplicon library was diluted in 75 µL of running buffer with 35 µL RBF,  
230 25.5 uL LLB, and 2.5 µL nuclease-free water and then added to the flow cell via the

1  
2  
3  
4  
5  
6  
7  
8  
9  
10  
11  
12  
13  
14  
15  
16  
17  
18  
19  
20  
21  
22  
23  
24  
25  
26  
27  
28  
29  
30  
31  
32  
33  
34  
35  
36  
37  
38  
39  
40  
41  
42  
43  
44  
45  
46  
47  
48  
49  
50  
51  
52  
53  
54  
55  
56  
57  
58  
59  
60  
61  
62  
63  
64  
65

231 SpotON sample port. The “NC\_48Hr\_sequencing\_FLO-MIN107\_SQK-  
232 LSK108\_plus\_Basecaller.py” protocol was initiated using the MinION control software,  
233 MinKNOW (offline version provided by ONT).

234

235 **Bioinformatics**

236 The commands used can be found in the Supplementary Materials and Methods  
237 section.

238 To retrieve the nucleotide sequences from raw signal data generated by the MinKNOW  
239 software, we used Albacore 1.2.5 (<https://github.com/dvera/albacore>) for base calling  
240 and de-multiplexing of the ONT barcodes (Albacore, RRID:SCR\_015897). The FAST5  
241 files were then converted to fastq files using Nanopolish [7];

242 <https://github.com/jts/nanopolish>). We then filtered the raw reads for quality (score of  
243 >13) and read length (> 200bp) using Nanofilt (<https://github.com/wdecoster/nanofilt>),  
244 and generated consensus sequences using both reference-based mapping and *de novo*  
245 assembly. For the reference-based mapping we used BWA 0.7.15 (BWA ,  
246 RRID:SCR\_010910)[8]; <https://github.com/lh3/bwa/releases>) to align the reads to the  
247 reference, samtools 1.3 (SAMTOOLS , RRID:SCR\_002105)[9] to process the mapping  
248 file, and ANGSD [10], to call the consensus sequence. The *de novo* assembly of each  
249 amplicon was carried out using Canu (Canu, RRID:SCR\_015880)[11],

250 <https://canu.readthedocs.io>), with parameters fitting for our application. Given that we  
251 used short amplicons for the assembly we set the minimum read length to 200bp and  
252 the minimum overlap to 50bp. We subsequently extracted the consensus sequences  
253 using tgStoreDump. After the consensus calling (for both methods) we mapped the

1  
2  
3  
4 254 reads back to the consensus sequence (using BWA mem and samtools as described  
5  
6  
7 255 above) and polished the sequencing using Nanopolish [7]. Adapters were removed  
8  
9 256 using Cutadapt (cutadapt, RRID:SCR\_011841)[12]. The consensi were then aligned to  
10  
11  
12 257 the Sanger sequences of the same amplicons to investigate the quality of the  
13  
14 258 consensus sequences generated from MinION reads using SeaView (SeaView,  
15  
16 259 RRID:SCR\_015059)[13] and AliView (AliView, RRID:SCR\_002780)[14]. Sanger  
17  
18  
19 260 sequencing reads were edited and assembled using Geneious R10 software (Geneious,  
20  
21 261 RRID:SCR\_010519)[15] and mapping files inspected by eye using Tablet [16].  
22

23  
24 262 We further tested the impact of coverage on the consensus accuracy by  
25  
26 263 randomly subsampling three sets of 30, 100, 300 and 1,000 reads, respectively for the  
27  
28  
29 264 eyelash palm pitviper and gecko 1. Subsampling was performed with famas  
30  
31 265 (<https://github.com/andreas-wilm/famas>). These sets were assembled *de novo* and  
32  
33 266 processed using the same approach we used for the full data sets (see above).  
34

35  
36 267 We then created species alignments for all barcodes (using sequences obtained  
37  
38 268 from Genbank; accession numbers can be found in the phylogenetic tree  
39  
40  
41 269 reconstructions in the Supplementary material). We inferred the best substitution model  
42  
43 270 using jModelTest (jModelTest, RRID:SCR\_015244) [17] and reconstructed their  
44  
45  
46 271 phylogenetic trees using the maximum likelihood approach implemented in Mega 5 [18]  
47  
48 272 with 1,000 bootstrap replicates (for bioinformatics workflow see Fig. 2). The output tree  
49  
50  
51 273 files including the accession numbers are provided in the supplementary material.  
52

53 274  
54  
55 275 **Results**  
56

57 276  
58  
59  
60  
61  
62  
63  
64  
65

1  
2  
3  
4  
5  
6  
7  
8  
9  
10  
11  
12  
13  
14  
15  
16  
17  
18  
19  
20  
21  
22  
23  
24  
25  
26  
27  
28  
29  
30  
31  
32  
33  
34  
35  
36  
37  
38  
39  
40  
41  
42  
43  
44  
45  
46  
47  
48  
49  
50  
51  
52  
53  
54  
55  
56  
57  
58  
59  
60  
61  
62  
63  
64  
65

277 On July 11, 2017, we arrived at the field site at approximately 1500 hours and collected  
278 reptile and amphibian samples from 2000 to 2300 hours. Next, back at the field station,  
279 we extracted DNA and performed PCR amplification for 16S, CytB, and ND4 genes. On  
280 July 12, the PCR barcodes were pooled, the library was prepared, and then sequencing  
281 was initiated at approximately 1600 hours on a flow cell using the offline MinKNOW  
282 software, generating 16,663 reads after approximately two hours. The MinKNOW  
283 software was then paused in order to assess the reads generated. Within 24 hours of  
284 collecting reptiles and amphibians in the Ecuadorian Chocó, we successfully generated  
285 consensus sequences for 16S and ND4 genes of an eyelash palm pitviper (*Bothriechis*  
286 *schlegelii*) and 16S for the dwarf gecko (*Lepidoblepharis* sp.; gecko 1). The CytB gene  
287 was not successfully sequenced, which was later confirmed at UTI's lab by lack of PCR  
288 product on a gel (Supplementary Table 3, Supplementary Figure 4). The field-generated  
289 sequence data was analyzed that evening on a laptop using a number of open source  
290 and custom-developed bioinformatic workflows (see Materials and Methods).  
291 Phylogenetic trees generated using the nanopore sequences and previously generated  
292 reference database yielded accurate species identification (Fig. 3 and Fig. 4).

293         Upon returning to UTI's lab in Quito, we created one additional DNA barcode  
294 library with new samples. With our remaining flow cell, we were interested in quickly  
295 generating genetic information for (a) additional specimens that were collected during  
296 our field expedition (gecko 2), (b) undescribed snake species collected the week before  
297 our expedition (Genera: *Dipsas* and *Sibon*), (c) an endangered species that would have  
298 been difficult to export out of the country (Jambato toad), (d) a rare species lacking



1  
2  
3  
4  
5  
6  
7  
8  
9  
10  
11  
12  
13  
14  
15  
16  
17  
18  
19  
20  
21  
22  
23  
24  
25  
26  
27  
28  
29  
30  
31  
32  
33  
34  
35  
36  
37  
38  
39  
40  
41  
42  
43  
44  
45  
46  
47  
48  
49  
50  
51  
52  
53  
54  
55  
56  
57  
58  
59  
60  
61  
62  
63  
64  
65

299 molecular data (Guayaquil blind snake), and (e) combinations of barcoded samples  
300 through multiplexing (for the eyelash palm pitviper and gecko 1).

301           Initially, this second sequencing run appeared to perform well. However, after  
302 using Albacore to demultiplex the reads, we determined the adapter ligation enzyme  
303 likely degraded because the output primarily consisted of adapter sequences  
304 (Supplementary Figure 1, Supplementary Table 1). Nevertheless, we were able to  
305 generate consensus sequences for 16S of the Jambato toad, the two *Dipsas* species,  
306 the dwarf gecko, and the Guayaquil blind snake (Fig. 3 and Fig. 4).

307           The pore count of the flow cells appeared to be unaffected by travel conditions,  
308 as indicated by the multiplexer (MUX) scan, an ONT program that performs a quality  
309 check by assessing flow cell active pore count. The first run in the field had an initial  
310 MUX scan of 478, 357, 177, and 31, for a total of 1,043 active pores and after  
311 approximately two hours of sequencing the flow cell generated 16,484 reads. The  
312 second flow cell ran at UTI had a MUX scan of 508, 448, 277, and 84, for total of 1,317  
313 active pores and the run produced 21,636 reads within two hours. This is notable since  
314 this run was performed 8 days after arriving in Ecuador and the flow cell was stored at  
315 suboptimal conditions on site and during travel. The presence or absence of PCR  
316 product and size was later determined by gel electrophoresis and quantified by a  
317 Quantus Fluorometer (Promega) at UTI. Amplification for 16S and ND4 was successful  
318 for all samples, but amplification of CytB was unsuccessful, perhaps due to suboptimal  
319 PCR settings, as samples were run concurrently due to the limitation and time-  
320 constraint of having only one miniPCR machine available (Supplementary Figure 4).

321 While the ONT protocol calls for equimolar ratios of pooled PCR product, we did not

1  
2  
3  
4  
5  
6  
7  
8  
9  
10  
11  
12  
13  
14  
15  
16  
17  
18  
19  
20  
21  
22  
23  
24  
25  
26  
27  
28  
29  
30  
31  
32  
33  
34  
35  
36  
37  
38  
39  
40  
41  
42  
43  
44  
45  
46  
47  
48  
49  
50  
51  
52  
53  
54  
55  
56  
57  
58  
59  
60  
61  
62  
63  
64  
65

322 have an accurate way of quantifying DNA in the field and as such had an  
323 overrepresentation of 16S sequences, likely due to PCR bias. On future field  
324 expeditions, an inexpensive device such as the bluegel DNA electrophoresis (produced  
325 by miniPCR) can be used to assess DNA and PCR products.

326  
327 **Sequencing and Bioinformatics**

328 *Eyelash Palm Pitviper (Bothriechis schlegelii)*

329 The eyelash palm pitviper (*B. schlegelii*) is an iconic venomous pitviper species found in  
330 mesic forests of Central and northwestern South America [3]. One individual was  
331 captured on the evening of the 11th of July 2017 and sequenced on the MinION the  
332 following evening. We obtained 3,696 reads for the 16S fragment, 65 reads for CytB,  
333 and 94 for ND4. The 16S reads showed an average length of 655bp including the  
334 sequencing adapters. The best contig created by Canu was based on 55 reads, to  
335 which 3,695 reads mapped for the polishing step. The consensus sequence was 501bp  
336 and showed a 100% nucleotide match to the respective Sanger sequence. For this  
337 species, we did not find any differences between the *de novo* and the reference-based  
338 mapping consensus sequences (generated by mapping against a reference from the  
339 same species). The individual clusters with all other *B. schlegelii* and *B. supraciliaris*  
340 (considered by some authors to be conspecific with *B. schlegelii*) sequences in the  
341 phylogenetic tree (Fig. 3A). While the CytB *de novo* assembly did not succeed (no two  
342 reads assembled together), the best supported contig for ND4 (864bp) was based on 50  
343 sequences and achieved an accuracy of 99.4% after polishing (using 95 reads that  
344 mapped to the *de novo* consensus).

1  
2  
3  
4  
5  
6  
7  
8  
9  
10  
11  
12  
13  
14  
15  
16  
17  
18  
19  
20  
21  
22  
23  
24  
25  
26  
27  
28  
29  
30  
31  
32  
33  
34  
35  
36  
37  
38  
39  
40  
41  
42  
43  
44  
45  
46  
47  
48  
49  
50  
51  
52  
53  
54  
55  
56  
57  
58  
59  
60  
61  
62  
63  
64  
65

345

346 *Dwarf Geckos (Genus: Lepidoblepharis)*

347

Dwarf geckos (genus: *Lepidoblepharis*) are small bodied leaf litter geckos found in

348

Central and South America. Dwarf geckos can be difficult to identify in the field and it is

349

suspected that there are several cryptic species within this genus in Ecuador. We

350

captured two individuals on the evening of the 11th of July 2017, and because the two

351

geckos differed in the shape and size of the dorsal scales (Fig. 3B) and were difficult to

352

confidently identify by morphological characters, we decided to investigate them further

353

with DNA barcoding.

354

355 *Gecko 1 (Lepidoblepharis aff. grandis)*

356

Gecko 1 was included in the first sequencing run in the field. We obtained 4,834 reads

357

for the 16S fragment, 63 reads for CytB, and 76 for ND4. The consensus sequence

358

(522bp) for this individual showed a 100% nucleotide match to the respective Sanger

359

sequence. We then performed reference-based mapping using *L. xanthostigma*

360

(Genbank accession: KP845170) as a reference and the resulting consensus had

361

99.4% accuracy. We found three insertions compared to the Sanger and the *de novo*

362

consensus sequences (position 302: G and 350-351: AA). Next we attempted

363

assemblies for CytB and ND4. While the assembly for the CytB reads failed, we were

364

able to assemble the ND4 reads. However, the polished consensus sequence showed a

365

relatively high error rate compared to the Sanger sequence (92.1% accuracy). We then

366

blasted all ND4 reads against NCBI. For ND4 we found 8 sequences to blast to ND4

367

from squamates, 4 to 16S (3 to a viper and 1 to a gecko), 3 to the positive control, 10

1  
2  
3  
4  
5  
6  
7  
8  
9  
10  
11  
12  
13  
14  
15  
16  
17  
18  
19  
20  
21  
22  
23  
24  
25  
26  
27  
28  
29  
30  
31  
32  
33  
34  
35  
36  
37  
38  
39  
40  
41  
42  
43  
44  
45  
46  
47  
48  
49  
50  
51  
52  
53  
54  
55  
56  
57  
58  
59  
60  
61  
62  
63  
64  
65

368 very short hits (negligible hits), and 46 to find no blast hit. Interestingly, while only 8  
369 reads were hits for ND4 from squamates, 72 reads mapped to the consensus of the *de*  
370 *nov*o assembly. The higher error rate can thus be explained by the fact that contaminant  
371 reads were used to assemble and correct consensus. The *de novo* assembled  
372 consensus showed an accuracy of 91.7% compared to 92.1% for the polished  
373 sequence.

375 *Gecko 2 (Lepidoblepharis aff. buchwaldi)*

376 Gecko 2 was included in the second sequencing run at UTI. We generated 325 reads  
377 (for more information see discussion on the possible issue with the adapter ligation  
378 enzyme). After filtering for read quality and assembly, we found the best contig to be  
379 supported by 30 reads. Out of the 325 barcoded reads, we found 308 to map to the  
380 consensus. After running Nanopolish, we found it to match 98.4% to the Sanger  
381 sequence. All of the observed differences were indels (mostly 1 bp, but also one 4 bp  
382 indel; positions: 15, 23, 217 and 250-253, respectively, Fig. 3B). Positions 15 and 23  
383 show an A in the reference, which is not found in the nanopore consensus (filtered or  
384 unfiltered, and polished or not polished). Position 217 is a C in the Sanger reference.  
385 None of the consensi for the nanopore data showed the C. This error can potentially be  
386 explained as it lies within a 6 bp cytosine homopolymer (see Lu et al., 2016).  
387 Interestingly, we saw only a 1bp mismatch instead of the 4bp indel at position 250-253  
388 in the filtered, but not polished nanopore consensus sequence. After polishing all  
389 sequences (filtered or unfiltered) showed the 4bp indel. We next applied reference  
390 based mapping (same protocol and reference as for gecko 1). The resulting consensus

1  
2  
3  
4  
5  
6  
7  
8  
9  
10  
11  
12  
13  
14  
15  
16  
17  
18  
19  
20  
21  
22  
23  
24  
25  
26  
27  
28  
29  
30  
31  
32  
33  
34  
35  
36  
37  
38  
39  
40  
41  
42  
43  
44  
45  
46  
47  
48  
49  
50  
51  
52  
53  
54  
55  
56  
57  
58  
59  
60  
61  
62  
63  
64  
65

391 sequence showed an accuracy of 97.9%. Phylogenetic tree reconstruction shows that  
392 gecko 1 and gecko 2 are clearly two distinct species (see Fig. 3B).

393

394 *Jambato toad (Atelopus ignescens)*

395 Laboratory processing and sequencing for *Atelopus ignescens* was carried out in the  
396 lab at UTI using a preserved tadpole sample. We obtained 503 reads for this species.  
397 The best supported *de novo* assembled contig was based on 56 reads. We then  
398 mapped the reads back to this contig for the polishing step, which resulted in 491  
399 mapped reads. However, while the total coverage was 434x for the segment, the  
400 average coverage was only 212x. The discrepancy can be explained by a high  
401 percentage of reads that exclusively consisted of adapter sequences (probably caused  
402 by inefficient adapter ligation; see Discussion section; Supplementary Figure 1). The  
403 resulting sequence fits 100% to the respective Sanger sequence (Fig. 3C). We next  
404 used the reference-based approach to construct a consensus sequence, using *Atelopus*  
405 *hoogmoedi* (Genbank accession: EU672974) as a reference and the consensus  
406 achieved an accuracy of 100% after polishing. The phylogenetic tree reconstruction  
407 clusters our sequence with samples described as *A. sp. aff. ignescens*.

408

409 *Guayaquil blind snake (Trilepida guayaquilensis)*

410 The Guayaquil blind snake (*Trilepida guayaquilensis*) belongs to the family of Slender  
411 blind snakes (Leptotyphlopidae). This family is found in North and South America, Asia,  
412 and Africa. They are fossorial snakes adapted to life underground. The Guayaquil blind  
413 snake was only known from one individual described in 1970 and is endemic to Ecuador

1  
2  
3  
4  
5  
6  
7  
8  
9  
10  
11  
12  
13  
14  
15  
16  
17  
18  
19  
20  
21  
22  
23  
24  
25  
26  
27  
28  
29  
30  
31  
32  
33  
34  
35  
36  
37  
38  
39  
40  
41  
42  
43  
44  
45  
46  
47  
48  
49  
50  
51  
52  
53  
54  
55  
56  
57  
58  
59  
60  
61  
62  
63  
64  
65

[19]. For a second specimen collected by Jose Vieira on March 03, 2016 at Pacoche, province of Manabi, Ecuador (S1.0677 W80.88169 323m), we obtained 756 sequences. However, many of those reads were adapter sequences. The Canu *de novo* assembled sequence was generated from 16 reads. We then mapped 740 reads back to this consensus. After polishing the consensus sequence matched 100% of the Sanger generated sequence (Fig. 4A; 516bp consensus length). We further investigated the accuracy of reference based mapping for this species. We used *Trilepida macrolepis* (Genbank accession: GQ469225) as a reference, which is suspected to be a close relative of *T. guayaquilensis*. However, the resulting consensus sequence had a lower accuracy (97.7%) compared to the *de novo* assembled consensus (100%). Our sequence is sister to the clade comprising *Trilepida macrolepis* and all *Rena* species in the phylogenetic tree.

*Dipsas snakes (Genus: Dipsas)*

*Dipsas* are non-venomous New World colubrid snakes that are found in Central and South America (Cadle 2005). Here we included two specimens collected one week prior to our expedition.

*Dipsas oreas* (MZUTI 5418)

We generated 779 reads for *Dipsas oreas* (MZUTI5418). The best supported contig of the Canu *de novo* assembly (498bp consensus length) was based on 59 reads and matched the corresponding Sanger sequence to 99% after polishing (Fig. 4B). Three out of 5 mismatches were indels in poly-A stretches (position: 185, 287, 411). The

1  
2  
3  
4  
5  
6  
7  
8  
9  
10  
11  
12  
13  
14  
15  
16  
17  
18  
19  
20  
21  
22  
23  
24  
25  
26  
27  
28  
29  
30  
31  
32  
33  
34  
35  
36  
37  
38  
39  
40  
41  
42  
43  
44  
45  
46  
47  
48  
49  
50  
51  
52  
53  
54  
55  
56  
57  
58  
59  
60  
61  
62  
63  
64  
65

437 remaining two mismatches are a C to G at position 469 and a T to A at position 489 for  
438 the nanopore compared to the Sanger sequence. Interestingly, the reference-based  
439 consensus sequence (using *Dipsas* sp., GenBank accession: KX283341 as a  
440 reference) matched the Sanger sequence to 99.4% after polishing. We generated 816  
441 reads for the CytB barcode. However, *de novo* assembly was not successful as only  
442 three reads blasted to CytB. However, the lengths of the hits were insignificant. Two  
443 sequences blasted to 16S, one blasted to a Dipsadine snake and one to *Atelopus*. One  
444 read belonged to the positive control and 53 showed insignificantly short hits.

446 *Dipsas oreas* (MZUTI 5415)

447 We generated 487 reads for *Dipsas* (MZUTI 5415). Sequences with a quality score of  
448 >13 were retained resulting in 193 sequences. The best supported contig of the Canu  
449 *de novo* assembly was based on 59 reads (498bp consensus length). After polishing  
450 the consensus sequence matched the corresponding Sanger sequence to 98.9% (Fig.  
451 4B). The first two mismatches are typical nanopore errors, namely indels in poly-A  
452 stretches (positions: 287, 411). The nanopore sequence shows an insertion of a single  
453 G compared to the Sanger sequence as position 431. The last mismatch is a three base  
454 pair deletion compared to the Sanger sequence (positions: 451-453). The reference-  
455 based consensus (using *Dipsas* sp., GenBank accession: KX283341 as a reference)  
456 achieved a 98.4% match after polishing. We generated 1,077 reads for the CytB  
457 barcode. Again, *de novo* assembly was not successful as only four reads actually  
458 belonged to CytB. Four sequences belonged to the positive control, seven to 16S (four  
459 blasted to Colubridae, and three to squamates), one to a Viperidae microsatellite, and

1  
2  
3  
4  
5  
6  
7  
8  
9  
10  
11  
12  
13  
14  
15  
16  
17  
18  
19  
20  
21  
22  
23  
24  
25  
26  
27  
28  
29  
30  
31  
32  
33  
34  
35  
36  
37  
38  
39  
40  
41  
42  
43  
44  
45  
46  
47  
48  
49  
50  
51  
52  
53  
54  
55  
56  
57  
58  
59  
60  
61  
62  
63  
64  
65

460 51 gave insignificantly short hits. The two *Dipsas* specimens clustered together in the  
461 phylogeny. They are sister to the clade comprising *D. neivai* and *D. variegata*. However,  
462 this part of the phylogeny shows low support (bootstraps < 50).

463

464 *Sibon* sp. (Genus: *Sibon*)

465 *Sibon* snakes are found in northern South America, Central America and Mexico [20].

466 We generated 339 reads for the 16S barcode of this species. However, we were not  
467 able to create a consensus sequence for this barcode, as almost all the reads were  
468 adapter sequences (all but 11 reads). Furthermore, we generated 1,425 reads for the  
469 CytB barcode but were not able to create a consensus sequence.

470

471 *Subsampling*

472 We further investigated the read depth needed to call accurate consensus sequences  
473 using our approach. We used the eyelash palm pitviper and gecko 1 to test  
474 subsampling schemes, since we obtained thousands of reads for these samples. We  
475 randomly subsampled to 30, 100, 300 and 1,000 reads (in three replicates; see  
476 Supplementary Table 4). For the eyelash palm pitviper we achieved accuracies ranging  
477 from 99.4% to 99.8% using only 30 reads, 99.6% to 100% using 100 reads, 99.8% for  
478 300 reads and 99.8% to 100% for 1,000 reads. For gecko 1 we achieved even better  
479 accuracy overall, with 30 reads ranging from 99.4% to 99.8%, 100 reads from 99.8% to  
480 100%, all 300 reads sets achieved an accuracy of 100% and for 1,000 reads all but one  
481 set (99.8%) achieved 100% accuracy.

482



1  
2  
3  
4  
5  
6  
7  
8  
9  
10  
11  
12  
13  
14  
15  
16  
17  
18  
19  
20  
21  
22  
23  
24  
25  
26  
27  
28  
29  
30  
31  
32  
33  
34  
35  
36  
37  
38  
39  
40  
41  
42  
43  
44  
45  
46  
47  
48  
49  
50  
51  
52  
53  
54  
55  
56  
57  
58  
59  
60  
61  
62  
63  
64  
65

483 *Multiplexing*

484 We further sequenced multiplexed barcodes (16S and ND4) for the eyelash palm  
485 pitviper and gecko 1. However, we did not obtain reads for this sample from sequencing  
486 run 2, most likely due to the adapter ligation issues. We thus generated artificial  
487 multiplexes for the eyelash palm pitviper pooling random sets of 1,000 16S reads with  
488 all 96 ND4 reads to investigate the performance of the *de novo* assembly using  
489 multiplexed samples. We assembled the reads *de novo* and processed them using the  
490 same approach as discussed above. In all three cases, we found the first two contigs of  
491 the canu run to be 16S and ND4 contigs. After polishing the 16S consensus sequences  
492 achieved a 99.8% accuracy (all three assemblies showed a deletion in a stretch of four  
493 T's compared to the Sanger sequence) and the ND4 sequences a 99.4% accuracy. All  
494 errors, but one (which shows a T compared to the C in the Sanger sequence), in ND4  
495 are deletions in homopolymer stretches.

497 **Discussion**

499 **Performance in the field**

500 Our objective was to employ a portable laboratory in a rainforest to quickly identify  
501 endemic species with DNA barcoding. Our protocols resulted in successful DNA  
502 extraction, PCR amplification, nanopore sequencing, and barcode assembly, with a  
503 turnaround time of less than 24 hours. We observed that the MinION sequencing  
504 platform performed well in the field after extended travel, indicating the potential for  
505 nanopore-based sequencing on future field expeditions. Although we demonstrate that

1  
2  
3  
4  
5  
6  
7  
8  
9  
10  
11  
12  
13  
14  
15  
16  
17  
18  
19  
20  
21  
22  
23  
24  
25  
26  
27  
28  
29  
30  
31  
32  
33  
34  
35  
36  
37  
38  
39  
40  
41  
42  
43  
44  
45  
46  
47  
48  
49  
50  
51  
52  
53  
54  
55  
56  
57  
58  
59  
60  
61  
62  
63  
64  
65

506 the successful molecular identification of organisms in a remote tropical environment is  
507 possible, challenges with molecular work in the field remain. Our field site was provided  
508 with inconsistent electrical power, but still allowed us to use a conventional small  
509 centrifuge for several steps of DNA extraction and to power a refrigerator for storage of  
510 flow cells and some of the reagents, although temperatures were likely suboptimal. Lack  
511 of electrical supply can impede adequate storage of temperature-sensitive reagents for  
512 extended periods of time. Our experiments were performed during a relatively short field  
513 trial, with 10 days being the longest time period that reagents were kept at inconsistent  
514 freezing temperatures. It is uncertain how well nanopore kit reagents or flow cell  
515 integrity would endure over longer periods without consistent cooling temperatures, and  
516 we suspect the adapter ligation enzyme was compromised during our second nanopore  
517 run, as demultiplexing led to a majority of barcode adapters in each folder  
518 (Supplementary Table 3). While the MinION sequencer fits in the palm of a hand and  
519 needs only a USB outlet to function, bioinformatic analyses can be hampered under  
520 remote field conditions, because internet access, large amounts of data storage, and  
521 long periods of time are often required for such analytical tasks. In our study, utilizing  
522 short DNA fragments with a relatively small number of samples for barcoding allowed us  
523 to perform all bioinformatic analyses in the field, but larger data outputs may require  
524 additional storage and more computational resources.

525  
**526 Implications for conservation and biodiversity assessments**

527 Tropical rainforests, such as the Ecuadorian Chocó, are often rich in biodiversity, as  
528 well as species of conservation concern. The Chocó biogeographical region is one of

1  
2  
3  
4  
5  
6  
7  
8  
9  
10  
11  
12  
13  
14  
15  
16  
17  
18  
19  
20  
21  
22  
23  
24  
25  
26  
27  
28  
29  
30  
31  
32  
33  
34  
35  
36  
37  
38  
39  
40  
41  
42  
43  
44  
45  
46  
47  
48  
49  
50  
51  
52  
53  
54  
55  
56  
57  
58  
59  
60  
61  
62  
63  
64  
65

529 the world's 25 biodiversity hotspots [29] and several studies have identified the Chocó  
530 region of western Colombia and Ecuador as a global conservation priority [29], [30],  
531 [31]. We therefore chose this region for proof of principle *in situ* molecular work to  
532 highlight the importance of expediting fieldwork in order to produce genetic information  
533 of endemic fauna. Our rapidly obtained DNA barcodes allowed us to accurately identify  
534 organisms while in the field. When samples are not required to be exported out of the  
535 country to carry out molecular experiments, real-time sequencing information can  
536 contribute to more efficient production of biodiversity reports that advise conservation  
537 policy, especially in areas of high conservation risk.

538         Of particular note in this study was the critically endangered harlequin Jambato  
539 toad, *Atelopus ignescens*. Although not a denizen of the Chocó rainforests, this Andean  
540 toad is a good example to demonstrate how nanopore sequencing can aid in the  
541 conservation of critically endangered species. *Atelopus ignescens* was previously  
542 presumed extinct (it is currently still listed as “extinct” on IUCN; [32]) and was only  
543 recently rediscovered [33]. The last confirmed record of *Atelopus ignescens* dates back  
544 to 1988, and this species was presumed to be extinct before one population was  
545 rediscovered in 2016, 28 years later. *Atelopus* is a species-rich genus of neotropical  
546 toads containing 96 species, most of which are possibly extinct or endangered. In  
547 Ecuador there are 11 species of *Atelopus* that are Critically Endangered (tagged as  
548 Possibly extinct; [34]). Extinctions of *Atelopus* (and other anurans) are beyond control  
549 and are increasingly exacerbated by a combination of factors including habitat loss,  
550 climate change and pathogens [35], [36], [37]. For the many endangered species that  
551 are protected by international laws and treaties, sample transport requires permits that

1  
2  
3  
4  
5  
6  
7  
8  
9  
10  
11  
12  
13  
14  
15  
16  
17  
18  
19  
20  
21  
22  
23  
24  
25  
26  
27  
28  
29  
30  
31  
32  
33  
34  
35  
36  
37  
38  
39  
40  
41  
42  
43  
44  
45  
46  
47  
48  
49  
50  
51  
52  
53  
54  
55  
56  
57  
58  
59  
60  
61  
62  
63  
64  
65

552 can often be difficult to obtain, even when research is expressly aimed at conservation,  
553 resulting in project delays that can further compromise sample quality. By working within  
554 the country, under permits issued by Ministerio del Ambiente de Ecuador to local  
555 institutions, we were able to generate sequence data for the endangered harlequin  
556 Jambato toad *Atelopus ignescens* within 24 hours of receiving the tissue, whereas  
557 obtaining permits to ship samples internationally in the same time frame would have not  
558 been possible. Rapidly identifying the phylogenetic affinity of populations of *Atelopus*  
559 toads could speed up conservation efforts for these animals. Namely, a better  
560 understanding of the systematics of the group facilitated by real-time sequencing could  
561 help establish species limits, geographic distributions, in-situ conservation actions and  
562 ex-situ breeding programs.

563

### 564 **Species identifications**

565 It is important to note that we do not intend for rapidly-obtained portable sequence  
566 information to substitute for standard species description processes. Instead, we aim to  
567 demonstrate that obtaining real-time genetic information can have beneficial  
568 applications for biologists in the field, such as raising the interesting possibility of  
569 promptly identifying new candidate species, information which can be used to adjust  
570 fieldwork strategies or sampling efforts. As we have shown, the latter could be  
571 especially important with organisms and habitats facing pressing threat. Rapidly  
572 obtaining genetic sequence information in the field can also be useful for a range of  
573 other applications, including identifying cryptic species, hybrid zones, immature stages,  
574 and species-complexes.

1  
2  
3  
4  
5  
6  
7  
8  
9  
10  
11  
12  
13  
14  
15  
16  
17  
18  
19  
20  
21  
22  
23  
24  
25  
26  
27  
28  
29  
30  
31  
32  
33  
34  
35  
36  
37  
38  
39  
40  
41  
42  
43  
44  
45  
46  
47  
48  
49  
50  
51  
52  
53  
54  
55  
56  
57  
58  
59  
60  
61  
62  
63  
64  
65

575           Furthermore, we acknowledge that in most cases multiple loci are needed to  
576 reliably infer species position in a phylogenetic tree. DNA barcoding has been shown to  
577 hold promise for identification purposes in taxonomically well-sampled clades, but may  
578 have limitations or pitfalls in delineating closely related species or in taxonomically  
579 understudied groups [38], [39]. However, our aim in this study was to demonstrate that  
580 portable sequencing can be used in the field and that the final sequences have an  
581 accuracy needed to achieve reliable identification of a specimen. While a recent study  
582 has demonstrated a field-based shotgun genome approach with the MinION to identify  
583 closely related plant species [26], DNA barcoding already offers a robust reference  
584 database for many taxa thanks in part to global barcoding initiatives (the current  
585 Barcode of Life Data System contains 4,013,927 specimens and 398,087 Barcode  
586 Index Numbers <http://ibol.org/resources/barcode-library/> as of September 2017).

587           Finally, while highlighting the value of real-time portable DNA barcoding in this  
588 study, we do not wish to downplay the significance of taxonomic experts, who have  
589 invaluable specialist knowledge about specific groups of organisms. Even with the  
590 advent of molecular diagnostic techniques to describe and discover species, placing  
591 organisms within a phylogenetic context based on a solid taxonomic foundation is  
592 necessary. An integrative approach utilizing molecular data and morphological  
593 taxonomy can lead to greater insight of biological and ecological questions [40]. As  
594 noted by Bik, 2017, *“There is much to gain and little to lose by deeply integrating*  
595 *morphological taxonomy with high-throughput sequencing and computational*  
596 *workflows.”*

1  
2  
3  
4  
5  
6  
7  
8  
9  
10  
11  
12  
13  
14  
15  
16  
17  
18  
19  
20  
21  
22  
23  
24  
25  
26  
27  
28  
29  
30  
31  
32  
33  
34  
35  
36  
37  
38  
39  
40  
41  
42  
43  
44  
45  
46  
47  
48  
49  
50  
51  
52  
53  
54  
55  
56  
57  
58  
59  
60  
61  
62  
63  
64  
65

## 598 **Bioinformatic challenges**

599 While we were able to show that nanopore sequencing results in high quality DNA  
600 barcode sequences, some challenges during the read processing remain. To our  
601 knowledge, no software solution specifically designed to assemble DNA barcodes from  
602 long read technologies is available. Here, we created our own pipeline (Supplementary  
603 Figure 2). This required changing the settings for Canu [41], a whole genome *de novo*  
604 assembler (see Materials and Methods in the Supplementary Information; and  
605 discussion below). However, software geared towards the specifics of assembling DNA  
606 barcodes from long read data would be beneficial to make the bioinformatics analysis  
607 easier and more widely applicable.

608 We were also interested in investigating the minimum coverage needed to create  
609 reliable consensus sequences. Therefore, we used different subsampling schemes.  
610 Overall, a coverage of 30 reads achieved an accuracy of 99.4 - 99.8%. With 100x read  
611 coverage almost all assemblies were 100% accurate, indicating that an excessive  
612 number of reads is not needed to produce high quality consensus sequences.  
613 Furthermore, we applied Nanopolish to all consensus sequences. This tool has been  
614 shown to be very effective at correcting typical nanopore errors, such as homopolymer  
615 errors [42], [43]. As can be seen in section "Post-Nanopolish assembly identity" in [43],  
616 accuracy of the resulting consensus increases significantly after polishing. While, we did  
617 not measure the improvement in accuracy in our study, we did notice a high accuracy  
618 after polishing. However, as can be seen in Fig. 4B, nanopolish is not always able to  
619 accurately correct homopolymer stretches.

1  
2  
3  
4  
5  
6  
7  
8  
9  
10  
11  
12  
13  
14  
15  
16  
17  
18  
19  
20  
21  
22  
23  
24  
25  
26  
27  
28  
29  
30  
31  
32  
33  
34  
35  
36  
37  
38  
39  
40  
41  
42  
43  
44  
45  
46  
47  
48  
49  
50  
51  
52  
53  
54  
55  
56  
57  
58  
59  
60  
61  
62  
63  
64  
65

620 We further tested reference-based mapping versus *de novo* assembly, because  
621 a reference-based mapping approach may introduce bias, making it possible to miss  
622 indels. Overall, we see that consensus sequences generated using reference-based  
623 mapping have slightly lower accuracy. However, in two cases (the eyelash palm pitviper  
624 and the Jambato toad) an accuracy of 100% was achieved with reference-based  
625 mapping. Interestingly, in the case of *Dipsas* sp. (MZUTI 5418), reference-based  
626 mapping resulted in a slightly better accuracy than the *de novo* approach (99.4%  
627 compared to 99%). However, in general, we recommend the use of a *de novo* assembly  
628 approach as this method can be applied even if no reference sequence is available and  
629 generally produced more accurate sequences. An alternative approach would be to  
630 generate consensus sequences by aligning the individual reads for each barcode to one  
631 another, which would not be affected by a reference bias. This method is implemented  
632 in the freely available software tool Allele Wrangler ([https://github.com/transplantation-](https://github.com/transplantation-immunology/allele-wrangler/)  
633 [immunology/allele-wrangler/](https://github.com/transplantation-immunology/allele-wrangler/)). However, at the time of submission this tool picks the first  
634 read as the pseudo reference, which can lead to errors in the consensus if this read is  
635 of particularly low quality or an incorrect (contaminant) sequence. Future developments  
636 might establish this method as an alternative to *de novo* assembly algorithms, which are  
637 typically written for larger genomes (e.g. the minimum genome size in Canu is 1000bp)  
638 and can have issues with assemblies where the consensus sequence is roughly the  
639 size of the input reads (*personal communications* Adam Phillippy).

640 Each of our two runs showed a very high number of reads not assigned to any  
641 barcode sequence after de-multiplexing with Albacore 1.2.5 (7,780 and 14,272 for the  
642 first and second sequencing run, respectively). In order to investigate whether these

1  
2  
3  
4  
5  
6  
7  
8  
9  
10  
11  
12  
13  
14  
15  
16  
17  
18  
19  
20  
21  
22  
23  
24  
25  
26  
27  
28  
29  
30  
31  
32  
33  
34  
35  
36  
37  
38  
39  
40  
41  
42  
43  
44  
45  
46  
47  
48  
49  
50  
51  
52  
53  
54  
55  
56  
57  
58  
59  
60  
61  
62  
63  
64  
65

643 reads belong to the target DNA barcodes but did not get assigned to sequencing  
644 barcodes, or if they constitute other sequences, we generated two references (one for  
645 each sequencing run) comprising all consensi found within each individual sequencing  
646 run. We then mapped all reads not assigned to barcodes back to the reference. We  
647 were able to map 2,874 and 4,997 reads to the reference for the first and the second  
648 sequencing run, respectively, which shows that a high number of reads might be usable  
649 if more efficient de-multiplexing algorithms become available. Here we used Albacore  
650 1.2.5, an ONT software tool, to de-multiplex the sequencing barcodes. This tool is under  
651 constant development and thus might offer more efficient de-multiplexing in later  
652 versions. Alternatively, 3rd party software tools like npBarcode [44] or Porechop  
653 (<https://github.com/rrwick/Porechop>) can be used.

**Cost-effectiveness and local resource development**

656 Next-generation sequencing technologies are constantly evolving, along with their  
657 associated costs. Most major next-generation sequencing platforms require  
658 considerable initial investment in the sequencers themselves, costing hundreds of  
659 thousands of dollars, which is why they are often consolidated to sequencing centers at  
660 the institutional level [45]. In this study, we used the ONT starter pack, which currently  
661 costs \$1000, and includes two flow cells and a library preparation kit (6 library  
662 preparations), as well as the ONT 12 barcoding kit which is currently \$250 for 6 library  
663 preparations (for a full list of equipment and additional reagents see Supplementary  
664 Table 1). Using this setup, each barcode amplicon sequence generated costs  
665 approximately \$45 (this includes cost for the starter pack, etc; a detailed cost account



1  
2  
3  
4  
5  
6  
7  
8  
9  
10  
11  
12  
13  
14  
15  
16  
17  
18  
19  
20  
21  
22  
23  
24  
25  
26  
27  
28  
29  
30  
31  
32  
33  
34  
35  
36  
37  
38  
39  
40  
41  
42  
43  
44  
45  
46  
47  
48  
49  
50  
51  
52  
53  
54  
55  
56  
57  
58  
59  
60  
61  
62  
63  
64  
65

666 can be found in the Supplementary material). At this cost, further multiplexing of  
667 samples on each flow cell is necessary to achieve a cost-effectiveness for DNA  
668 sequencing relative to other commercial options. However, it will likely not be long until  
669 much higher multiplexing (>500 samples) becomes achievable on the MinION platform,  
670 which would pave the way for MinION-based DNA barcode costs to be reduced to less  
671 than \$1, similar to advancements achieved in Illumina and PacBio-based pipelines (see  
672 [46], [47], [48]). On the contrary, Sanger sequencing from UTI in Ecuador shipped  
673 internationally for processing costs approximately \$10 per sample, independent of the  
674 through-put. Thus, the Oxford Nanopore MinION has the potential to be a cost-effective  
675 sequencing option for resource-limited labs, especially in developing countries without  
676 access to standard sequencing devices.

677         The small size and low power requirements of the MinION will likely continue to  
678 enable its evolution as a field-deployable DNA sequencing device, opening up new  
679 avenues for biological research in areas where the typical laboratory infrastructure for  
680 genetic sequencing is unavailable. With some training, in the field molecular analyses  
681 could also potentially be performed by students (see [49]) or assistants, providing an  
682 opportunity for local teaching and research capacity building, and community  
683 involvement via research focused ecotourism or citizen-science projects.

684

## 685 **Future outlook**

686 Technological developments in lab equipment and reagent chemistry are increasingly  
687 enabling the incorporation of genetic analyses into field projects. Several portable  
688 technologies have been used to perform molecular experiments in the field, particularly

1  
2  
3  
4  
5  
6  
7  
8  
9  
10  
11  
12  
13  
14  
15  
16  
17  
18  
19  
20  
21  
22  
23  
24  
25  
26  
27  
28  
29  
30  
31  
32  
33  
34  
35  
36  
37  
38  
39  
40  
41  
42  
43  
44  
45  
46  
47  
48  
49  
50  
51  
52  
53  
54  
55  
56  
57  
58  
59  
60  
61  
62  
63  
64  
65

689 for disease diagnostics [50], [51]. Advances in lyophilized and room-temperature  
690 reagents are also promising for field applications, such as EZ PCR Master Mix [52], and  
691 loop-mediated isothermal amplification [53], [54]. A hand-powered centrifuge [55] could  
692 also act as substitute for a standard benchtop centrifuge during DNA extraction steps.  
693 Automatic devices, such as VolTRAX (a compact microfluidic device designed to  
694 automate nanopore library preparation, ONT) and improved library construction  
695 methods may offer faster and high-throughput methods for preparing nanopore libraries  
696 in the future. As the ONT MinION evolves, it could greatly advance field researchers'  
697 capacity to obtain genetic data from wild organisms while in the field. These  
698 technologies currently depend on reagents that require freezing, but can be used at field  
699 sites with solar or portable freezer options. Faster and more automated sample  
700 processing, as well as cost reductions, are needed for adoption in low-income settings.

701       Beyond short PCR-based amplicons aimed at species identification, other  
702 exciting potential applications of nanopore sequencing in the field include sequencing of  
703 entire mitochondria from gDNA samples [56] or via long-range PCR, shotgun genome  
704 sequencing [26], analysis of environmental DNA [57], [24], sequencing of direct RNA  
705 [58], [59] or cDNA to rapidly profile transcriptomes ([60], and pathogen diagnostics and  
706 monitoring (such as chytrid fungus; [61]). Rapid portable sequencing can also be  
707 applied to wildlife crime to perform species identification of animals affected by illegal  
708 trafficking, as well as serve to aid in early detection of invasive species threatening local  
709 biodiversity and agriculture, and emerging infectious diseases.

710  
711 **Potential implications**

1  
2  
3  
4  
5  
6  
7  
8  
9  
10  
11  
12  
13  
14  
15  
16  
17  
18  
19  
20  
21  
22  
23  
24  
25  
26  
27  
28  
29  
30  
31  
32  
33  
34  
35  
36  
37  
38  
39  
40  
41  
42  
43  
44  
45  
46  
47  
48  
49  
50  
51  
52  
53  
54  
55  
56  
57  
58  
59  
60  
61  
62  
63  
64  
65

712 While we live in a period of amazing technological change, biodiversity and ecosystem  
713 health are decreasing worldwide. Portable sequencing will not be a silver bullet for  
714 conservation biology, but it can be a powerful tool to more efficiently obtain information  
715 about the diversity of life on our planet. This is particularly important for many  
716 biodiversity hotspots, such as tropical rainforests like the Ecuadorian Chocó, which are  
717 often under high risk of habitat loss. Here we show that portable DNA barcoding with  
718 the MinION sequencer allows rapid, accurate, and efficient determination at the species  
719 level under remote and tropical environmental conditions. We also demonstrate that  
720 portable sequencing can allow nimble use of rapidly generating data for endangered,  
721 rare, and undescribed species at nearby facilities within the country. As portable  
722 technologies develop further, this method has the potential to broaden the utility of  
723 biological field analyses including real-time species identification, cryptic species  
724 discovery, biodiversity conservation reports, pathogen detection, and environmental  
725 studies.

726

**Availability of supporting data**

728 Raw sequencing data is available in the SRA via bioproject number PRJNA438544, and  
729 other supporting data is available in the GigaScience GigaDB repository[62].

730

**Competing interests**

732 The authors report no competing interests.

733

**Author contributions**

1  
2  
3  
4  
5  
6  
7  
8  
9  
10  
11  
12  
13  
14  
15  
16  
17  
18  
19  
20  
21  
22  
23  
24  
25  
26  
27  
28  
29  
30  
31  
32  
33  
34  
35  
36  
37  
38  
39  
40  
41  
42  
43  
44  
45  
46  
47  
48  
49  
50  
51  
52  
53  
54  
55  
56  
57  
58  
59  
60  
61  
62  
63  
64  
65

735 AP and SP designed the project. AP, NP, AA, LB, FP, CB, DSV and SP carried out  
736 specimen collection; AP and NP laboratory work; AA, LB, FP, LC, CB and DSV  
737 morphological species identification and SP computational analyses. AP, NP, AA, LB,  
738 FP, LC, CB, DSV and SP wrote the paper.

739

740 **Acknowledgements**

741

742 Fieldwork for this project was made possible with the support of Tropical Herping and  
743 Universidad Tecnológica Indoamérica. For granting access to the Canandé reserve, we  
744 are grateful to Martin Schaefer of Fundación Jocotoco. Funding for equipment and  
745 reagents was supported by the National Geographic Society / Waitt grant (W412-15).  
746 Travel funding for Stefan Prost was provided by the Program of Conservation Genomics  
747 at Stanford University. Laboratory work was carried out at Universidad Tecnológica  
748 Indoamérica in Quito. Research and collection permits were issued by the Ministerio del  
749 Ambiente de Ecuador (MAE-DNB-CM-2015-0017). The Jambato toad tissue was  
750 provided by the Museum of Centro Jambatu under the Ministerio del Ambiente de  
751 Ecuador project “Conservation of Ecuadorian amphibian diversity and sustainable use  
752 of its genetic resources.” We thank Oxford Nanopore Technologies for providing  
753 technical support, making the offline MinKNOW software available, and for providing  
754 two free flow cells. We also thank Hitomi Asahara and the UC Berkeley DNA  
755 Sequencing Facility for lending the benchtop centrifuge used in this study; Jared  
756 Simpson, Sergey Koren and Adam Phillippy for very helpful advice and discussion on  
757 the bioinformatic pipeline, and Ellie E. Armstrong for valuable input on the manuscript.

1  
2  
3  
4  
5  
6  
7  
8  
9  
10  
11  
12  
13  
14  
15  
16  
17  
18  
19  
20  
21  
22  
23  
24  
25  
26  
27  
28  
29  
30  
31  
32  
33  
34  
35  
36  
37  
38  
39  
40  
41  
42  
43  
44  
45  
46  
47  
48  
49  
50  
51  
52  
53  
54  
55  
56  
57  
58  
59  
60  
61  
62  
63  
64  
65

758

## 759 **Figures**

760

761 **Figure 1.** Process of nanopore sequencing in the Ecuadorian Chocó rainforest. A)

762 Sampling endemic fauna; eyelash pitviper next to MinION. B) Extraction of blood or

763 tissue samples. C) DNA extraction using the DNeasy kit and benchtop centrifuge, and

764 PCR amplification with the MiniPCR. D) Oxford nanopore library preparation of DNA

765 barcodes. E) Bioinformatic processing of nanopore data in the field. F) Primary

766 equipment used in portable sequencing, left to right: MiniPCR sitting atop Poweradd

767 external battery, MinION plugged into a Windows laptop displaying Geneious Pro

768 software of raw nanopore data.

769

770 **Figure 2.** Bioinformatics workflow summarizing the steps performed during nanopore

771 sequencing analysis with either a de-novo approach (left) or reference-based mapping

772 approach (right), in order to generate a consensus sequences.

773

774 **Figure 3.** Species investigated, nucleotide alignments of nanopore and Sanger

775 sequences comparing consensus accuracy, and Maximum Likelihood trees of 16S

776 sequences for: A) Eyelash pitviper, *Bothriechis schlegelii*, B) two species of dwarf

777 gecko, *Lepidoblepharis* sp, and C) the Jambato toad, *Atelopus ignescens*. Red labels in

778 the phylogenetic trees indicate the sequences generated by the MinION.

779

1  
2  
3  
4  
5  
6  
7  
8  
9  
10  
11  
12  
13  
14  
15  
16  
17  
18  
19  
20  
21  
22  
23  
24  
25  
26  
27  
28  
29  
30  
31  
32  
33  
34  
35  
36  
37  
38  
39  
40  
41  
42  
43  
44  
45  
46  
47  
48  
49  
50  
51  
52  
53  
54  
55  
56  
57  
58  
59  
60  
61  
62  
63  
64  
65

**Figure 4.** Species investigated, nucleotide alignments of nanopore and Sanger sequences comparing consensus accuracy, and Maximum Likelihood trees of 16S sequences for: A) Guayaquil blind snake, *Trilepida guayaquilensis* and B) two species *Dipsas* snakes. Red labels in the phylogenetic trees indicate the sequences generated by the MinION.

**References**

1. Erwin TL. Tropical Forests Their Richness in Coleoptera and Other Arthropod Species. *The Coleop Bull.* 1982;36:74-75.
2. Stork NE. How many species are there? *Biodiv Conserv.* 1993;2:215-232.
3. Scheffers BR, Joppa LN, Pimm SL, Laurance WF. What we know and don't know about Earth's missing biodiversity. *Trends Ecol Evol.* 2012;27:501-510.
4. Sierra R, Campos F, Chamberlin J. Assessing biodiversity conservation priorities: ecosystem risk and representativeness in continental Ecuador. *Landscape and Urban Planning.* 2002;59:95-110.
5. Cuesta F, Peralvo M, Merino-Viteri A, Bustamante M, Baquero F, et al. Priority areas for biodiversity conservation in mainland Ecuador. *Neotrop Biodiv.* 2017;3:93-106.
6. Gascon C, Brooks TM, Contreras-MacBeath T, Heard N, Konstant W, et al. The importance and benefits of species. *Curr Biol.* 2015;25:R431-438.

1  
2  
3  
4  
5  
6  
7  
8  
9  
10  
11  
12  
13  
14  
15  
16  
17  
18  
19  
20  
21  
22  
23  
24  
25  
26  
27  
28  
29  
30  
31  
32  
33  
34  
35  
36  
37  
38  
39  
40  
41  
42  
43  
44  
45  
46  
47  
48  
49  
50  
51  
52  
53  
54  
55  
56  
57  
58  
59  
60  
61  
62  
63  
64  
65

801 7. Pimm SL, Jenkins CN, Abell R, Brooks TM, Gittleman JL, et al. The biodiversity of  
802 species and their rates of extinction, distribution, and protection. *Science*.  
803 2014;344:1246752.

804 8. Ceballos G, Ehrlich PR, Dirzo R. Biological annihilation via the ongoing sixth mass  
805 extinction signaled by vertebrate population losses and declines. *Proc Natl Acad*  
806 *Sci USA*. 2017;114:E6089-E6096.

807 9. Colonma LA, Duellman WE, Almendariz A, Ron, SR. Five new (extinct?) species of  
808 *Atelopus* (Anura: Bufonidae) from Andean Colombia, Ecuador, and Peru.  
809 *Zootaxa*. 2010;2574:1-54.

810 10. Loetters S, Van der Meijden A, Coloma LA, Boistel R, Cloetens P, et al. Assessing  
811 the molecular phylogeny of a near extinct group of vertebrates: the Neotropical  
812 harlequin frogs (Bufonidae; *Atelopus*). *System Biodiv*. 2011;9:45-57.

813 11. Barley AJ, White J, Diesmos AC, Brown RM. The challenge of species delimitation  
814 at the extremes: diversification without morphological change in philippine sun  
815 skinks. *Evolution*. 2013;67:3556-3572.

816 12. Carstens BC, Pelletier TA, Reid NM, Satler JD. How to fail at species delimitation.  
817 *Mol Ecol*. 2013;22:4369-4383.

818 13. Hebert PD, Cywinska A, Ball SL, deWaard JR. Biological identifications through  
819 DNA barcodes. *Proc Biol Sci*. 2003;270:313-321.

820 14. Hebert PD, Gregory TR. The promise of DNA barcoding for taxonomy. *Syst Biol*.  
821 2005;54:852-859.

1  
2  
3  
4  
5  
6  
7  
8  
9  
10  
11  
12  
13  
14  
15  
16  
17  
18  
19  
20  
21  
22  
23  
24  
25  
26  
27  
28  
29  
30  
31  
32  
33  
34  
35  
36  
37  
38  
39  
40  
41  
42  
43  
44  
45  
46  
47  
48  
49  
50  
51  
52  
53  
54  
55  
56  
57  
58  
59  
60  
61  
62  
63  
64  
65

822 15. Savolainen V, Cowan RS, Vogler AP, Roderick GK, Lane R. Towards writing the  
823 encyclopedia of life: an introduction to DNA barcoding. *Philos Trans R Soc Lond*  
824 *B Biol Sci.* 2005;360:1805-1811.

825 16. Gilbert N. Biodiversity law could stymie research. *Nature.* 2010 Feb  
826 4;463(7281):598. doi: 10.1038/463598a.

827 17. Fernández F. The greatest impediment to the study of biodiversity in Colombia.  
828 *Caldasia.* 2011;33:3-5.

829 18. Laver T, Harrison J, O'Neill PA, Moore K, Farbos A, et al. Assessing the  
830 performance of the Oxford Nanopore Technologies MinION. *Biomol Detect*  
831 *Quantif.* 2015;3:1-8.

832 19. Mikheyev AS, Tin MM. A first look at the Oxford Nanopore MinION sequencer. *Mol*  
833 *Ecol Resour.* 2014;14:1097-1102.

834 20. Quick J, Loman NJ, Duraffour S, Simpson JT, Severi E, et al. Real-time, portable  
835 genome sequencing for Ebola surveillance. *Nature.* 2016;530:228-232.

836 21. Faria NR, Sabino EC, Nunes MR, Alcantara LC, Loman NJ, et al. Mobile real-time  
837 surveillance of Zika virus in Brazil. *Genome Med.* 2016;8:97.

838 22. Faria NR, Quick J, Claro IM, Theze J, de Jesus JG, et al. Establishment and cryptic  
839 transmission of Zika virus in Brazil and the Americas. *Nature.* 2017;546:406-410.

840 23. Edwards A, Debonnaire AR, Sattler B, Mur LAJ, Hodson AJ. Extreme  
841 metagenomics using nanopore DNA sequencing: a field report from Svalbard, 78  
842 °N. *bioRxiv.* 2016; <https://doi.org/10.1101/073965>



1  
2  
3  
4  
5  
6  
7  
8  
9  
10  
11  
12  
13  
14  
15  
16  
17  
18  
19  
20  
21  
22  
23  
24  
25  
26  
27  
28  
29  
30  
31  
32  
33  
34  
35  
36  
37  
38  
39  
40  
41  
42  
43  
44  
45  
46  
47  
48  
49  
50  
51  
52  
53  
54  
55  
56  
57  
58  
59  
60  
61  
62  
63  
64  
65

843 24. Johnson SS, Zaikova E, Goerlitz DS, Bai Y, Tighe SW. Real-Time DNA Sequencing  
844 in the Antarctic Dry Valleys Using the Oxford Nanopore Sequencer. *J Biomol*  
845 *Tech.* 2017;28:2-7.

846 25. Menegon M, Cantaloni C, Rodriguez-Prieto A, Centomo C, Abdelfattah A, Rossato  
847 M, Bernardi M, Xumerle L, Loader S, Delledonne M. On site DNA barcoding by  
848 nanopore sequencing. *PLoS One.*  
849 2017;<https://doi.org/10.1371/journal.pone.0184741>

850 26. Parker J, Helmstetter AJ, Devey D, Wilkinson T, Papadopoulos AST. Field-based  
851 species identification of closely-related plants using real-time nanopore  
852 sequencing. *Sci Rep.* 2017;7:8345.

853 27. Castro-Wallace SL, Chiu CY, John KK, Stahl SE, Rubins KH, McIntyre ABR,  
854 Dworkin JP, Lupisella ML, Smith DJ, Botkin DJ, Stephenson TA, Juul S, Turner  
855 DJ, Izquierdo F, Federman S, Stryke D, Somasekar S, Alexander N, Yu G,  
856 Mason CE, Burton AS. Nanopore DNA Sequencing and Genome Assembly on  
857 the International Space Station. *Sci Rep.* 2017 Dec 21;7(1):18022. doi:  
858 10.1038/s41598-017-18364-0.

859 28. Janzen DH, Hajibabaei M, Burns JM, Hallwachs W, Remigio E, et al. Wedding  
860 biodiversity inventory of a large and complex Lepidoptera fauna with DNA  
861 barcoding. *Philos Trans R Soc Lond B Biol Sci.* 2005;360:1835-1845.

862 29. Myers N, Mittermeier RA, Mittermeier CG, da Fonseca GA, Kent J. Biodiversity  
863 hotspots for conservation priorities. *Nature.* 2000;403:853-858.

864 30. Dinerstein E. A Conservation assessment of the terrestrial ecoregions of Latin  
865 America and the Caribbean. Washington, D.C.: World Bank. 1995;xvii, 129 p. p.

1  
2  
3  
4  
5  
6  
7  
8  
9  
10  
11  
12  
13  
14  
15  
16  
17  
18  
19  
20  
21  
22  
23  
24  
25  
26  
27  
28  
29  
30  
31  
32  
33  
34  
35  
36  
37  
38  
39  
40  
41  
42  
43  
44  
45  
46  
47  
48  
49  
50  
51  
52  
53  
54  
55  
56  
57  
58  
59  
60  
61  
62  
63  
64  
65

866 31. Olson DM, Dinerstein E. The Global 200: a representation approach to conserving  
867 the Earth's most biologically valuable ecoregions. *Conservation Biology*.  
868 1998;12:502-515.

869 32. Santiago Ron LAC, Stefan Lötters, William Duellman, Martín R. Bustamante, Wilmar  
870 Bolívar, Enrique La Marca. 2004 IUCN Red List *Atelopus ignescens*

871 33. Coloma L. El Jambato negro del páramo, *Atelopus ignescens*, resucitó. 2016  
872 IMCiencia.

873 34. Tapia EE, Coloma LA, Pazmiño-Otamendi G, Peñafiel N. Rediscovery of the nearly  
874 extinct longnose harlequin frog *Atelopus longirostris* (Bufonidae) in Junín,  
875 Imbabura, Ecuador. *Neotropical Biodiversity*. 2017;3:157-167.

876 35. Kiesecker JM. Global stressors and the global decline of amphibians: tipping the  
877 stress immunocompetency axis. *Ecological research*. 2011;26:897-908.

878 36. Pounds JA, Coloma LA. Beware the lone killer. *Nature Reports Climate Change*.  
879 2008;57-59.

880 37. Lips KR, Diffendorfer J, Mendelson III JR, Sears MW. Riding the wave: reconciling  
881 the roles of disease and climate change in amphibian declines. *PLoS Biology*.  
882 2008;6: e72.

883 38. Elias M, Hill RI, Willmott KR, Dasmahapatra KK, Brower AV, et al. Limited  
884 performance of DNA barcoding in a diverse community of tropical butterflies.  
885 *Proc Biol Sci*. 2007;274:2881-2889.

886 39. Meyer CP, Paulay G. DNA barcoding: error rates based on comprehensive  
887 sampling. *PLoS Biol*. 2005;3: e422.

1  
2  
3  
4  
5  
6  
7  
8  
9  
10  
11  
12  
13  
14  
15  
16  
17  
18  
19  
20  
21  
22  
23  
24  
25  
26  
27  
28  
29  
30  
31  
32  
33  
34  
35  
36  
37  
38  
39  
40  
41  
42  
43  
44  
45  
46  
47  
48  
49  
50  
51  
52  
53  
54  
55  
56  
57  
58  
59  
60  
61  
62  
63  
64  
65

40. Bik HM. Let's rise up to unite taxonomy and technology. *PLoS Biology*. 2017;15:  
e2002231.

41. Koren S, Walenz BP, Berlin K, Miller JR, Bergman NH, et al. Canu: scalable and  
accurate long-read assembly via adaptive k-mer weighting and repeat  
separation. *Genome Res*. 2017;27:722-736.

42. Loman NJ, Quick J, Simpson JT. A complete bacterial genome assembled de novo  
using only nanopore sequencing data. *Nat Methods*. 2015;12:733-735.

43. Wick RR, Judd LM, Gorrie CL, Holt KE. Completing bacterial genome assemblies  
with multiplex MinION sequencing. *Microb Genom*. 2017 Sep 14;3(10):e000132.  
doi: 10.1099/mgen.0.000132.

44. Nguyen SH, Duarte TPS, Coin LJM, Cao MD. Real-time demultiplexing Nanopore  
barcoded sequencing data with npBarcode. *Bioinformatics*. 2017 Dec  
15;33(24):3988-3990. doi: 10.1093/bioinformatics/btx537.

45. Glenn TC. Field guide to next-generation DNA sequencers. *Molecular ecology  
resources*. 2011;11: 759-769.

46. Meier R, Wong W, Srivathsan A, Foo M. \$1 DNA barcodes for reconstructing  
complex phenomes and finding rare species in specimen-rich samples. *Cladistics*  
2016;32(1):100-10.

47. Liu S, Yang C, Zhou C, Zhou X. Filling reference gaps via assembling DNA  
barcodes using high-throughput sequencing - moving toward barcoding the world.  
*GigaScience*, 2017; 1-8.

1  
2  
3  
4  
5  
6  
7  
8  
9  
10  
11  
12  
13  
14  
15  
16  
17  
18  
19  
20  
21  
22  
23  
24  
25  
26  
27  
28  
29  
30  
31  
32  
33  
34  
35  
36  
37  
38  
39  
40  
41  
42  
43  
44  
45  
46  
47  
48  
49  
50  
51  
52  
53  
54  
55  
56  
57  
58  
59  
60  
61  
62  
63  
64  
65

48. Hebert PDN, Brakmann TWA, Prosser SWJ, Ratnasingham S, deWaard JR, Ivanova NV, Janzen DH, Hallwachs W, Naik S, Sones JE, Zakharov EV. A Sequel to Sanger: Amplicon Sequencing That Scales. *bioRxiv*, doi: <https://doi.org/10.1101/191619>

49. Zeng, Y., & Martin, CH. Oxford Nanopore sequencing in a research-based undergraduate course. *bioRxiv* 2017;227439.

50. Canier L, Khim N, Kim S, Sluydts V, Heng S, et al. An innovative tool for moving malaria PCR detection of parasite reservoir into the field. *Malar J.* 2013;12:405.

51. Marx V. PCR heads into the field. *Nature Methods.* 2015;12:393-397.

52. Guevara EE, Frankel DC, Ranaivonasy J, Richard AF, Ratsirarson J, et al. A simple, economical protocol for DNA extraction and amplification where there is no lab. *Conservation Genetics Resources.* 2017;1-7.

53. Centeno-Cuadros A, Abbasi I, Nathan R. Sex determination in the wild: a field application of loop-mediated isothermal amplification successfully determines sex across three raptor species. *Mol Ecol Resour.* 2017;17:153-160.

54. Howson ELA, Armson B, Madi M, Kasanga CJ, Kandusi S, et al. Evaluation of Two Lyophilized Molecular Assays to Rapidly Detect Foot-and-Mouth Disease Virus Directly from Clinical Samples in Field Settings. *Transbound Emerg Dis.* 2017;64:861-871.

55. Bhamla MS, Benson B, Chai C, Katsikis G, Johri A, et al. Hand-powered ultralow-cost paper centrifuge. *Nature Biomedical Engineering.* 2017;1: 0009.

56. Chandler J, Camberis M, Bouchery T, Blaxter M, Le Gros G, et al. Annotated mitochondrial genome with Nanopore R9 signal for *Nippostrongylus brasiliensis*. *F1000Res.* 2017;6: 56.

1  
2  
3  
4  
5  
6  
7  
8  
9  
10  
11  
12  
13  
14  
15  
16  
17  
18  
19  
20  
21  
22  
23  
24  
25  
26  
27  
28  
29  
30  
31  
32  
33  
34  
35  
36  
37  
38  
39  
40  
41  
42  
43  
44  
45  
46  
47  
48  
49  
50  
51  
52  
53  
54  
55  
56  
57  
58  
59  
60  
61  
62  
63  
64  
65

932 57. Rees HC, Maddison BC, Middleditch DJ, Patmore JR, Gough KC. The detection of  
933 aquatic animal species using environmental DNA—a review of eDNA as a survey  
934 tool in ecology. *Journal of Applied Ecology*. 2014;51:1450-1459.

935 58. Ayub M, Hardwick SW, Luisi BF, Bayley H. Nanopore-based identification of  
936 individual nucleotides for direct RNA sequencing. *Nano Lett*. 2014;13: 6144-  
937 6150.

938 59. Garalde DR, Snell EA, Jachimowicz D, Sipos B, Lloyd JH, Bruce M, Pantic N,  
939 Admassu T, James P, Warland A, Jordan M, Ciccone J, Serra S, Keenan J,  
940 Martin S, McNeill L, Wallace EJ, Jayasinghe L, Wright C, Blasco J, Young S,  
941 Brocklebank D, Juul S, Clarke J, Heron AJ, Turner DJ. Highly parallel direct RNA  
942 sequencing on an array of nanopores. *Nat Methods*. 2018 Mar;15(3):201-206.  
943 doi: 10.1038/nmeth.4577.

944 60. Hargreaves AD, Mulley JF. Assessing the utility of the Oxford Nanopore MinION for  
945 snake venom gland cDNA sequencing. *PeerJ*. 2015;3:e1441.

946 61. Weldon C, du Preez LH, Hyatt AD, Muller R, Spears R. Origin of the amphibian  
947 chytrid fungus. *Emerg Infect Dis*. 2004;10:2100-2105.

948 62. Pomerantz, A; Peñafiel, N; Arteaga, A; Bustamante, L; Pichardo, F; Coloma, L, A;  
949 Barrio-Amorós, C; Salazar-Valenzuela, D; Prost, S (2018): Supporting data for  
950 “Real-time DNA barcoding in a rainforest using nanopore sequencing:  
951 opportunities for rapid biodiversity assessments and local capacity building”  
952 GigaScience Database. <http://dx.doi.org/10.5524/100426>

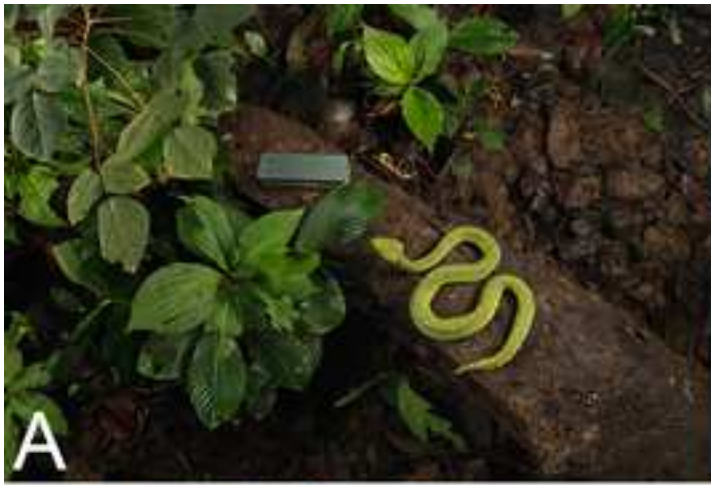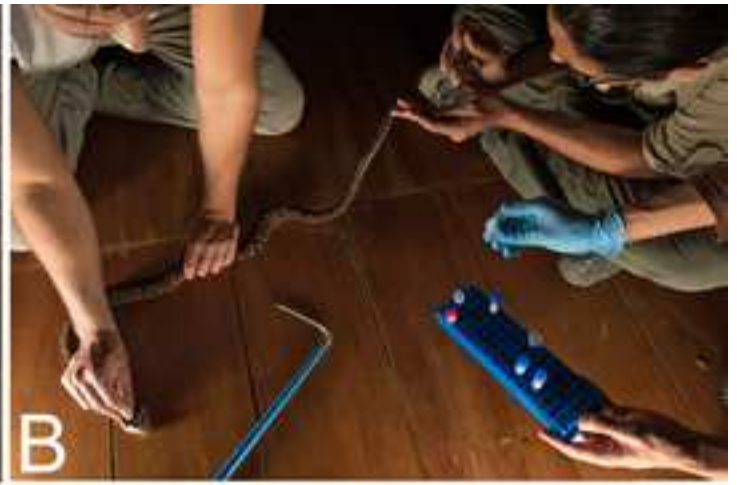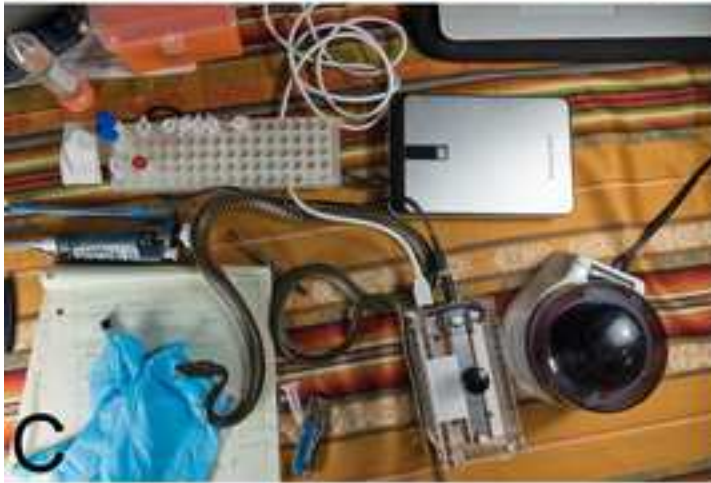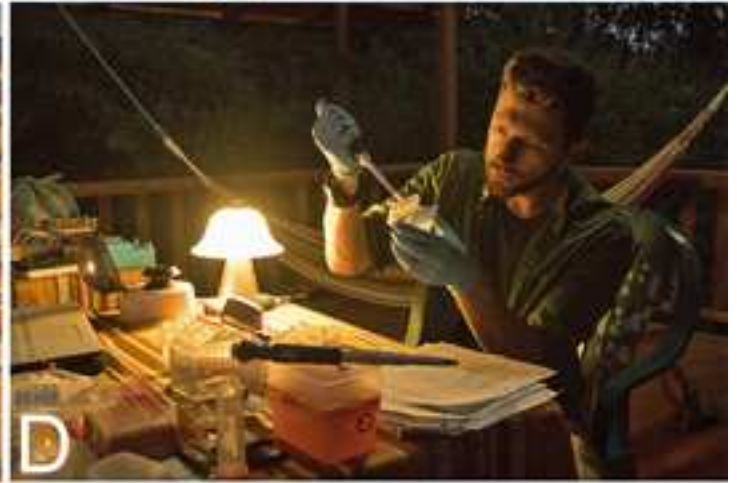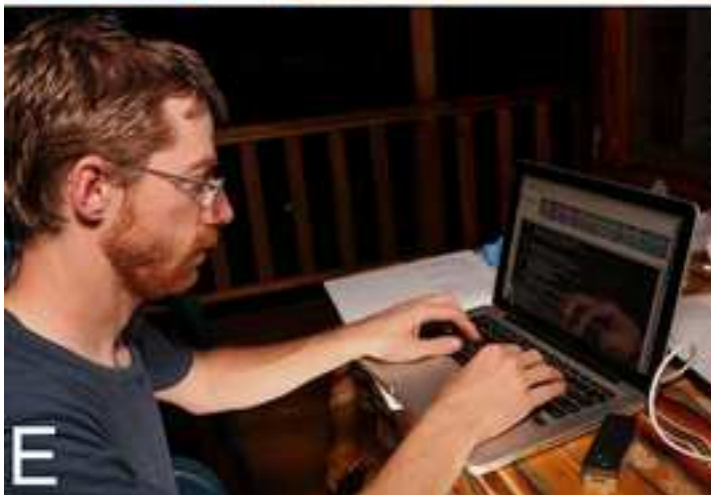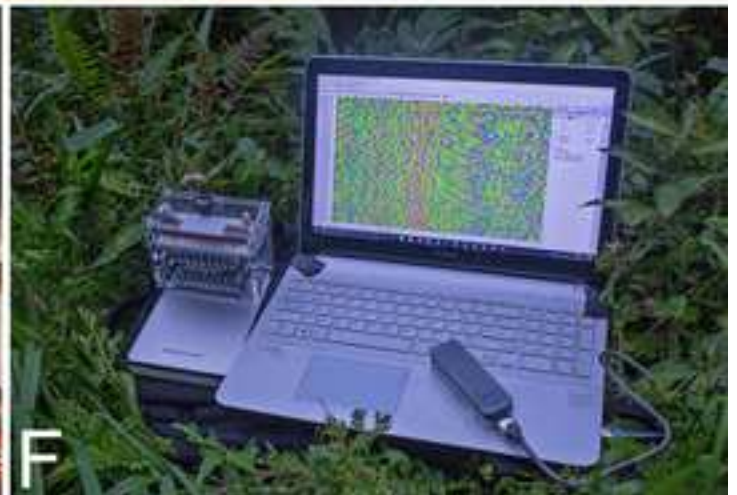

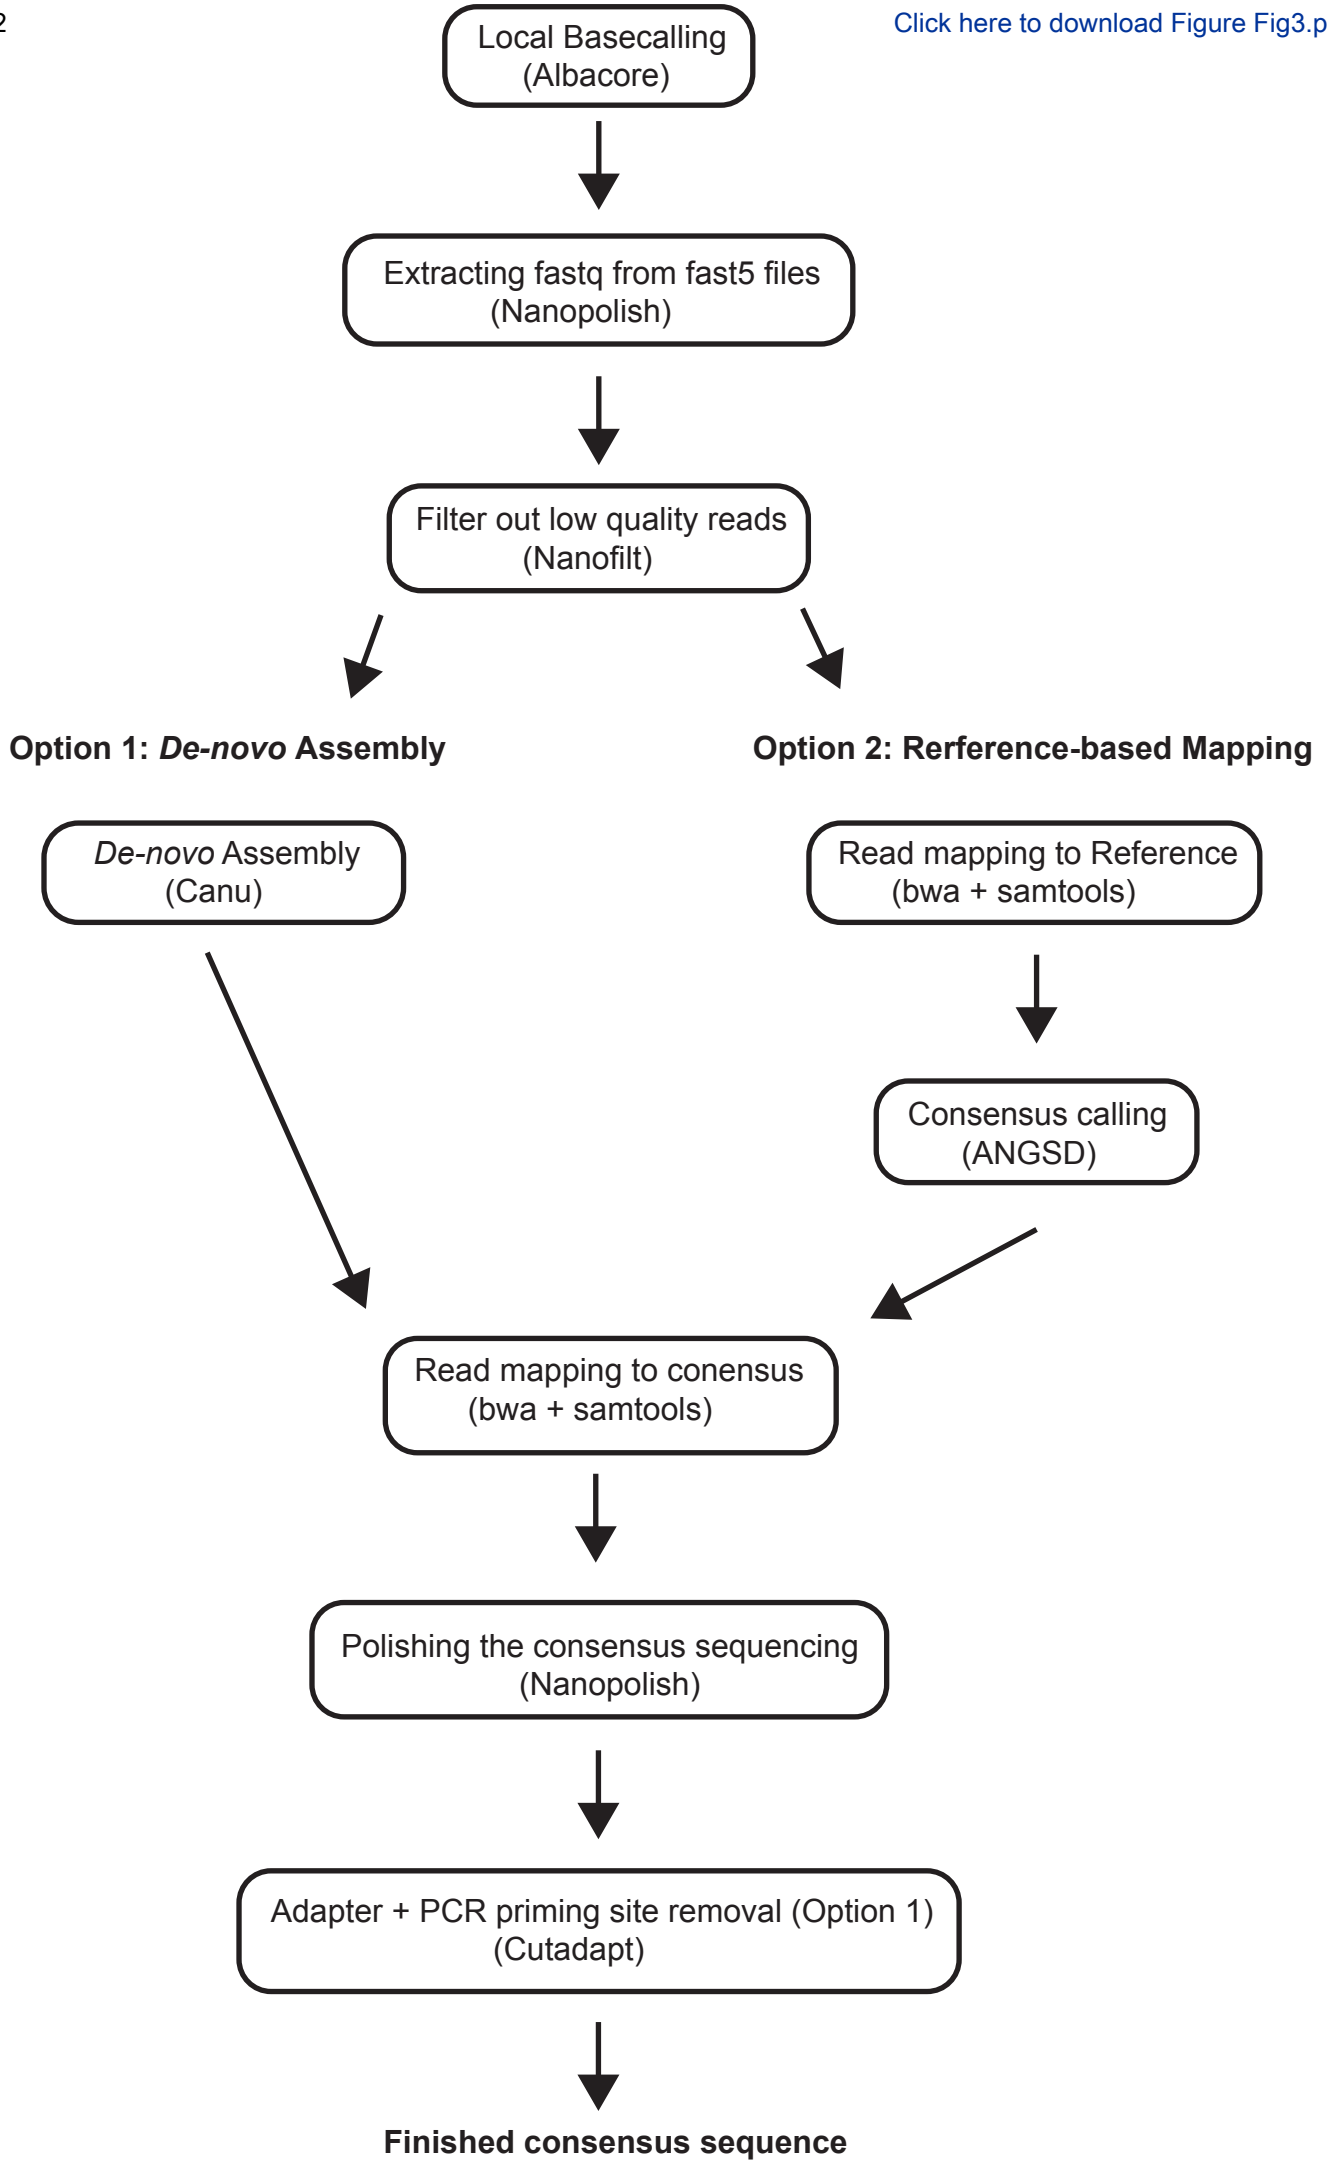

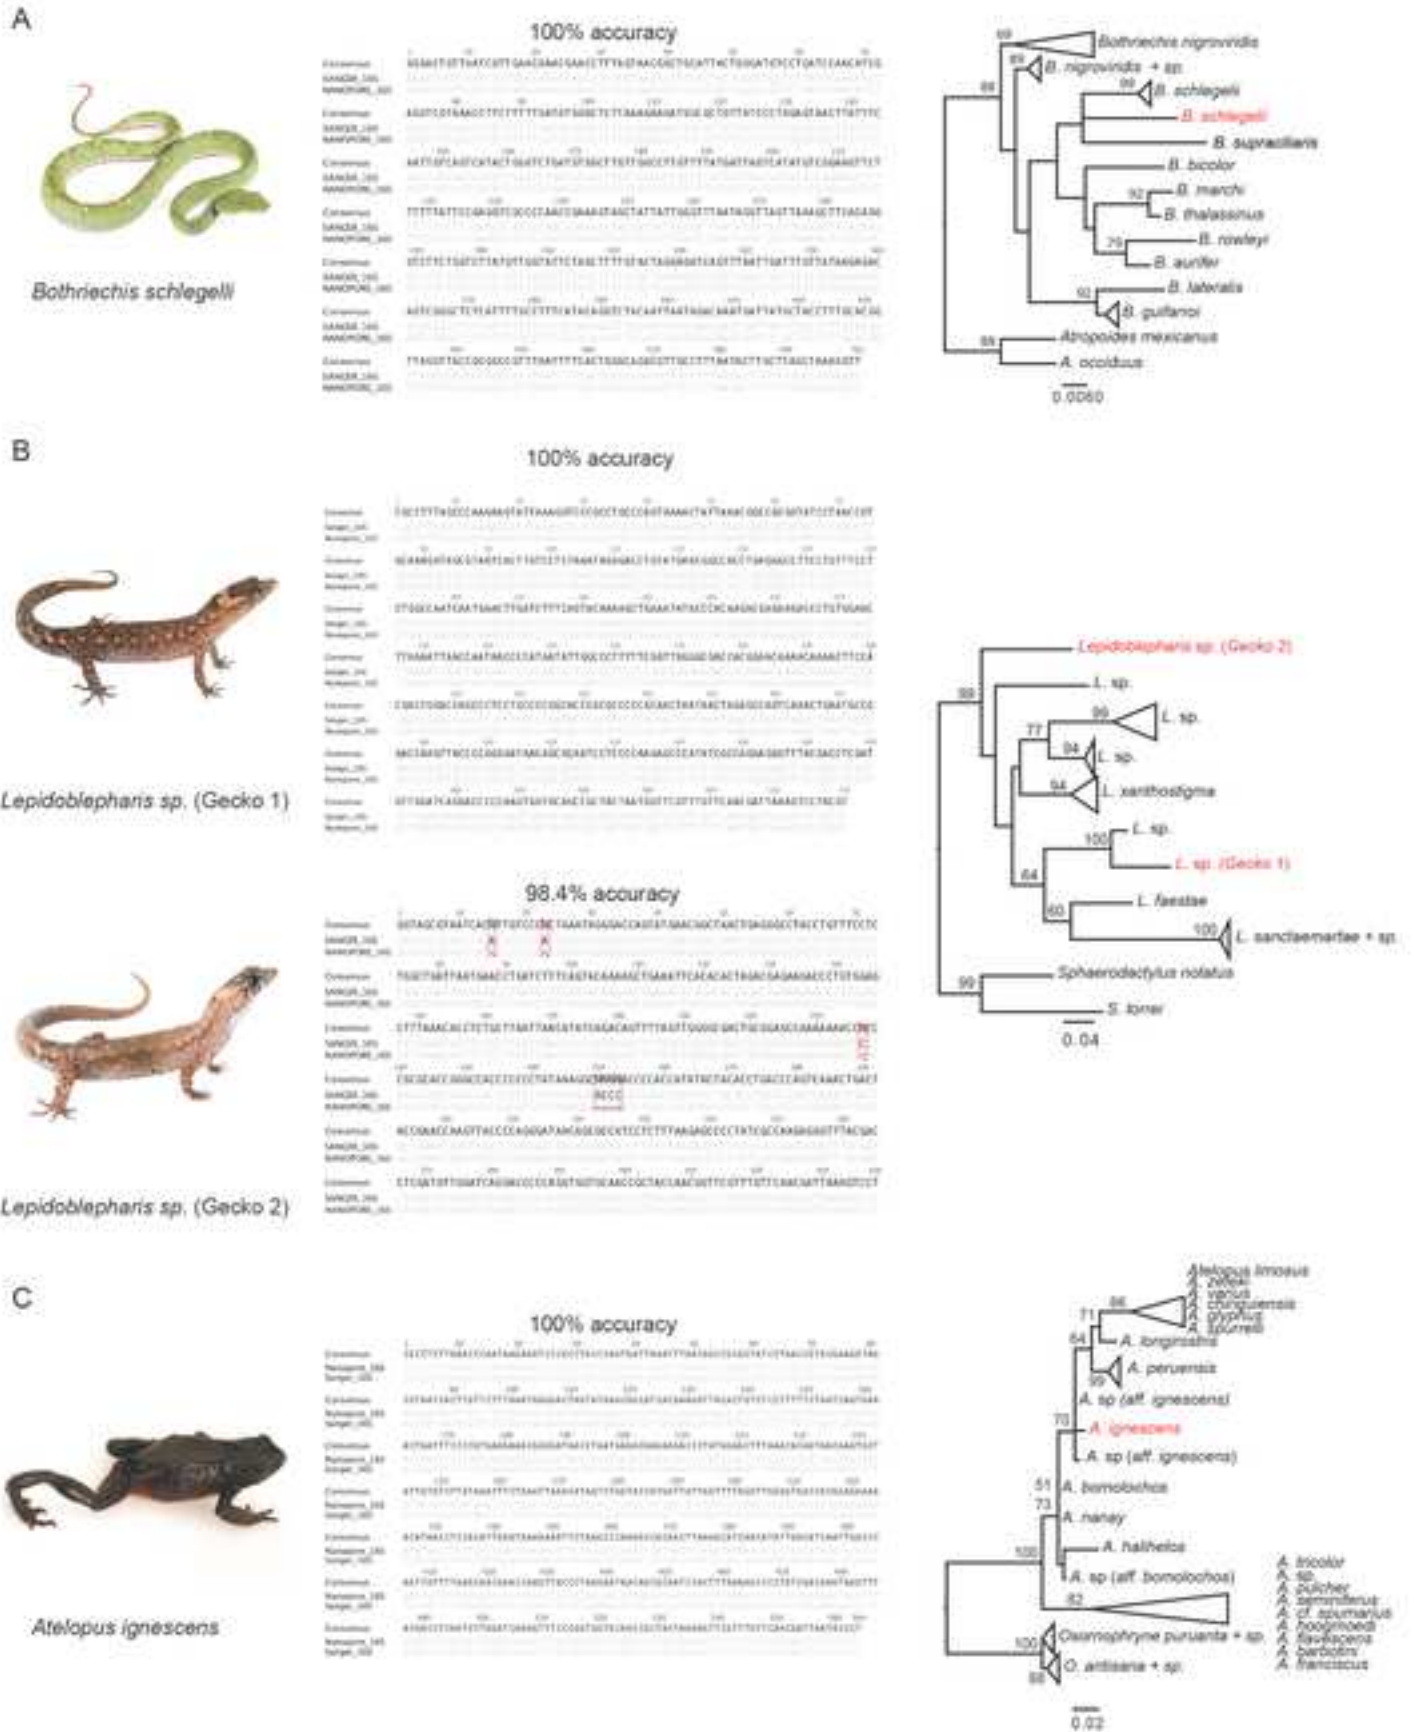



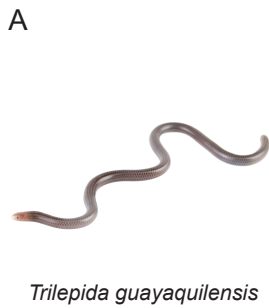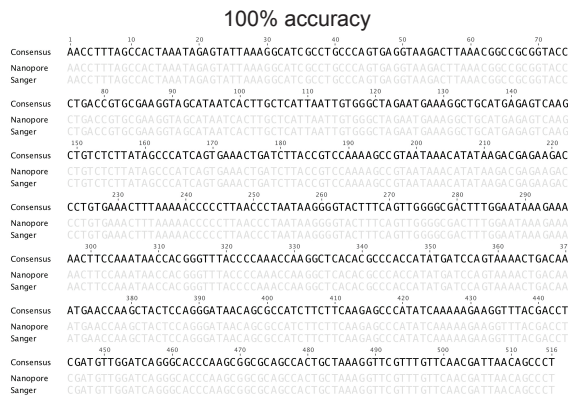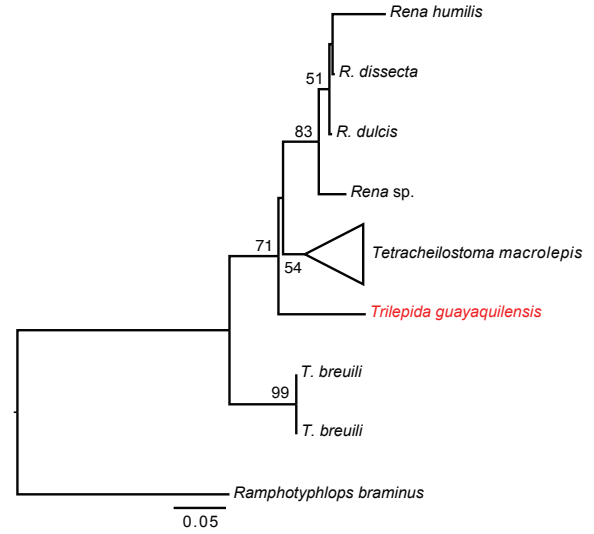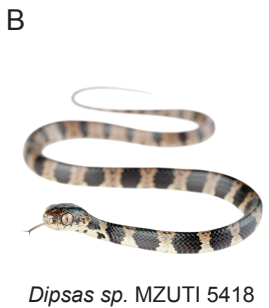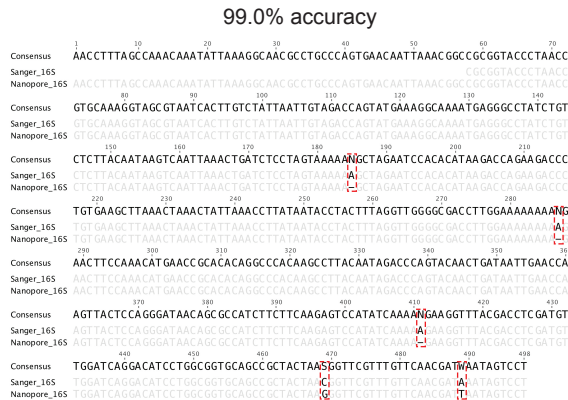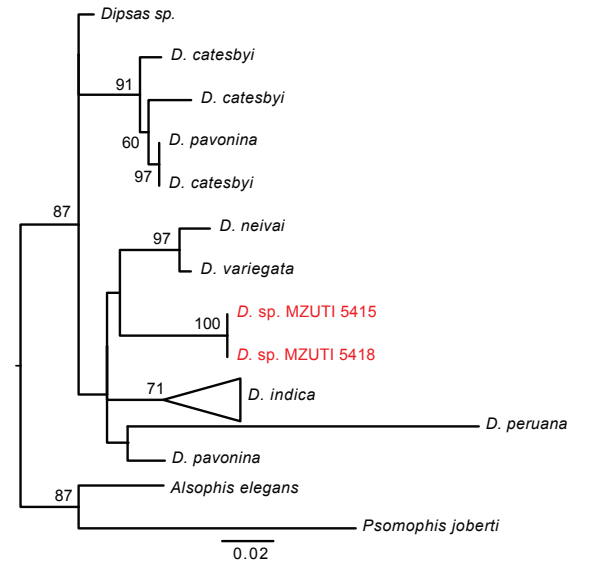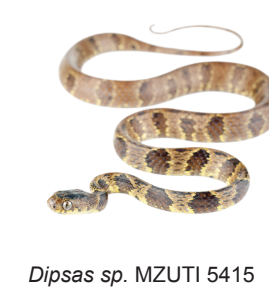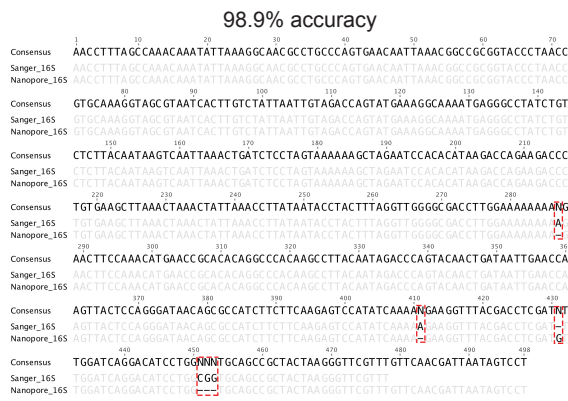

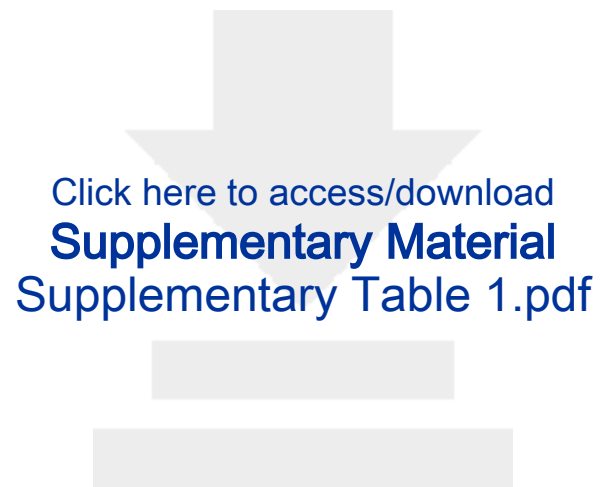

Click here to access/download  
**Supplementary Material**  
Supplementary Table 1.pdf

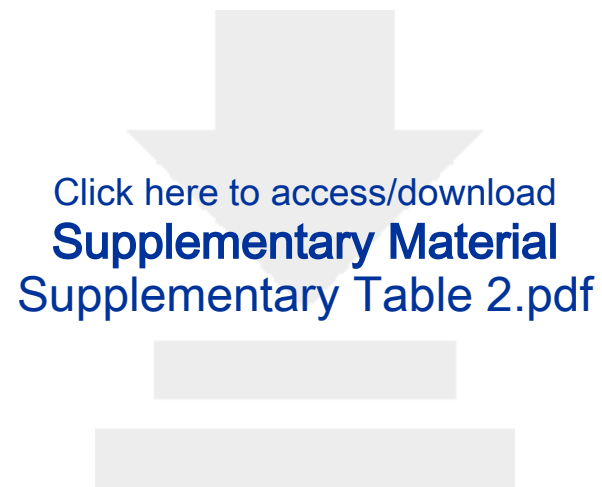

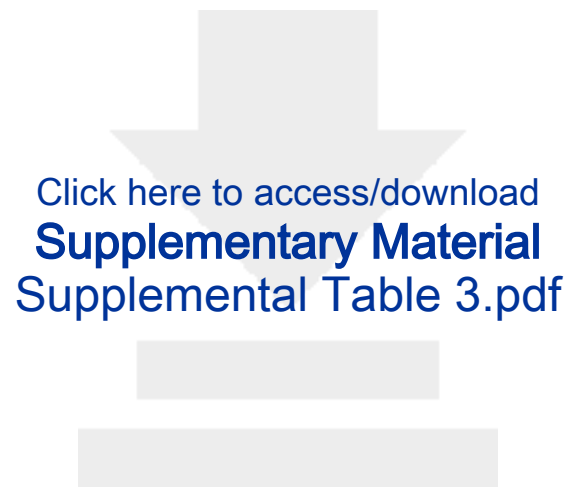

Click here to access/download  
**Supplementary Material**  
Supplemental Table 3.pdf

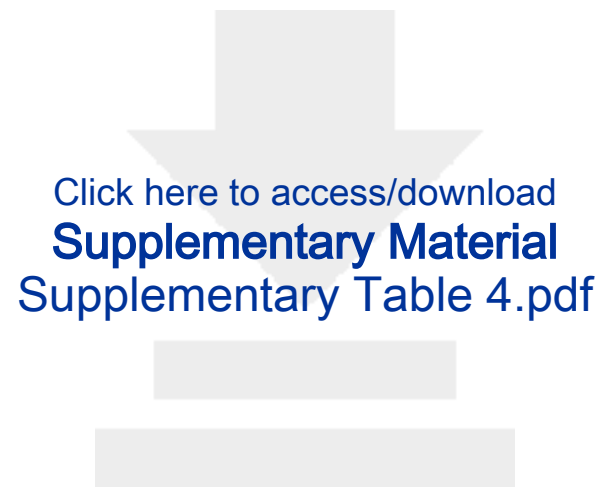

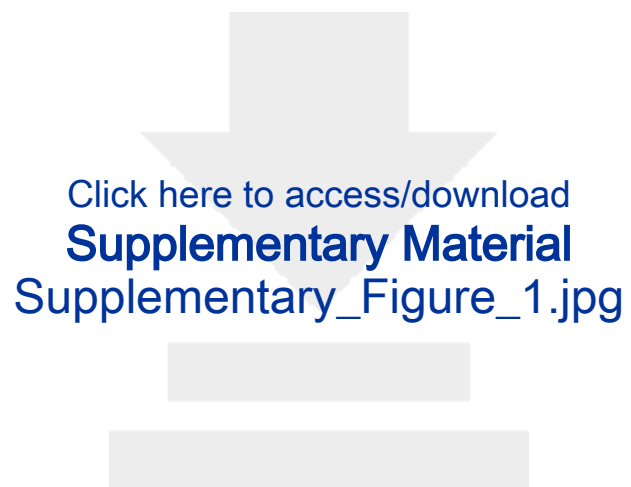

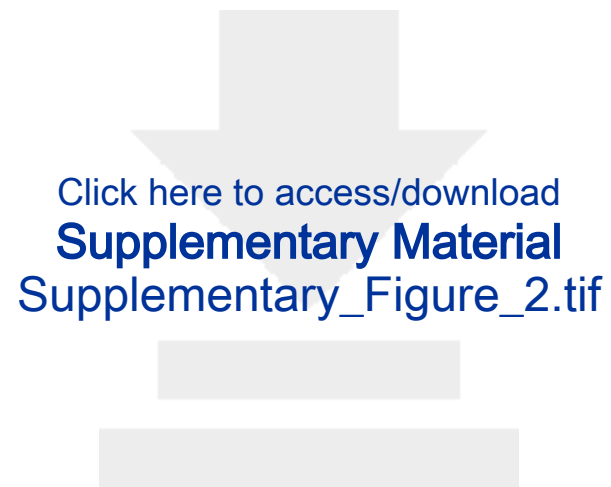

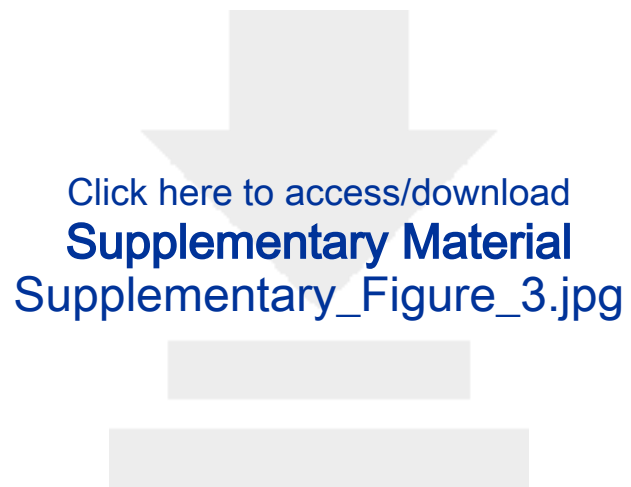



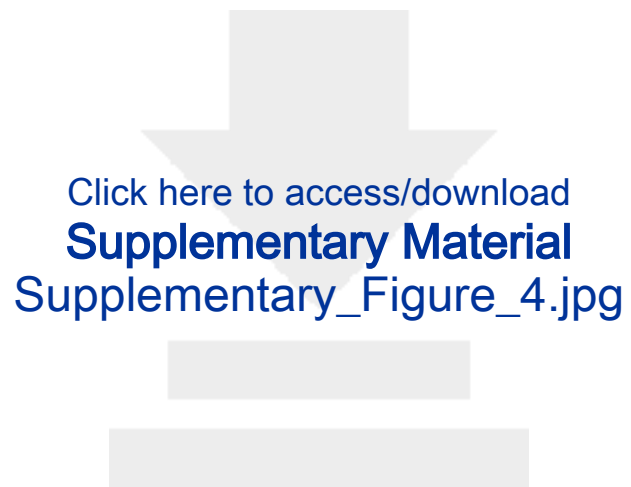

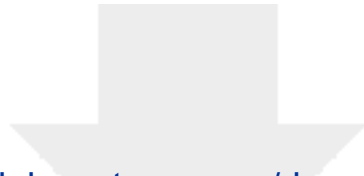

[Click here to access/download](#)

**Supplementary Material**

**SUPPLEMENTARY INFORMATION GigaScience.docx**

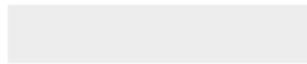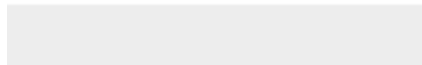

Supplement: giy033_giga-d-17-00345_revision_2.pdf [file giy033_giga-d-17-00345_revision_2.pdf]
