# Supplementary material for: Real-time DNA barcoding in a rainforest using nanopore sequencing: opportunities for rapid biodiversity assessments and local capacity building
Source: PubMed Central journal article supplement (PMC5905381; doi:10.1093/gigascience/giy033), 2018-04-02
Supplement: giy033_response_to_reviewer_comments_revision_1.pdf [file giy033_response_to_reviewer_comments_revision_1.pdf]

## Author's Response To Reviewer Comments

|                                      |                |
|--------------------------------------|----------------|
| 00000000-0000-0000-0000-000000000000 | 609GLRp43HPw t |
|--------------------------------------|----------------|

|          |                |
|----------|----------------|
| E2A9317A | zMm2Olg5M/4/Ae |
|----------|----------------|

Close

As per reviewer #2's suggestion, we have removed Figure 1 and adjusted the text accordingly.

Close
